# Supplementary material
Source: PubMed Central journal article supplement (PMC6614789)
Supplement: jo9b00884_si_001.pdf [file jo9b00884_si_001.pdf]

## Supporting Information

### **Peyssonnosides A–B, Unusual Diterpene Glycosides with a Sterically Encumbered Cyclopropane Motif: Structure Elucidation Using an Integrated Spectroscopic and Computational Workflow**

Bhuwan Khatri Chhetri,<sup>†,‡</sup> Serge Lavoie,<sup>‡,§,||</sup> Anne Marie Sweeney-Jones,<sup>†,‡</sup> Nazia Mojib,<sup>‡,§</sup> Vijay Raghavan,<sup>‡</sup> Kerstin Gagaring,<sup>#</sup> Brandon Dale,<sup>¶</sup> Case W. McNamara,<sup>#</sup> Katy Soapi,<sup>∇</sup> Cassandra L. Quave,<sup>¶</sup> Prasad L. Polavarapu,<sup>‡</sup> and Julia Kubanek<sup>\*,†,‡,§,◊</sup>

<sup>†</sup>School of Chemistry and Biochemistry, <sup>‡</sup>Aquatic Chemical Ecology Center, and <sup>§</sup>School of Biological Sciences, Georgia Institute of Technology, Atlanta, Georgia 30332, United States

<sup>||</sup>Institut des Sciences de la Forêt Tempérée, Université du Québec en Outaouais, 58, rue Principale, Ripon, Québec J0V 1V0, Canada

<sup>‡</sup>Department of Chemistry, Vanderbilt University, Nashville, Tennessee 37235, United States

<sup>#</sup>Calibr at The Scripps Research Institute, La Jolla 92037, California, United States

<sup>¶</sup>Department of Dermatology, Center for the Study of Human Health, and Antibiotic Resistance Center, Emory University, Atlanta, Georgia 30322, United States

<sup>∇</sup>Institute of Applied Sciences, University of South Pacific, Suva, Fiji

<sup>◊</sup>Parker H. Petit Institute for Bioengineering and Bioscience, Georgia Institute of Technology, Atlanta, Georgia 30332, United States

## Table of Contents

|                                                                                                                                       |         |
|---------------------------------------------------------------------------------------------------------------------------------------|---------|
| Figure S1. Morphology of <i>Peyssonnelia</i> sp.....                                                                                  | S1      |
| Figure S2. Evolutionary relationship of <i>Peyssonnelia</i> sp. G-1588 with related red algal species.....                            | S2      |
| Table S1. Bioassay results for <b>1–2</b> .....                                                                                       | S3      |
| Figure S3. Cytotoxicity of <b>1–2</b> against human keratinocytes (HaCaT).....                                                        | S3      |
| Figure S4. Antifungal activity of <b>1</b> against <i>Dendryphiella salina</i> .....                                                  | S4      |
| Figure S5. Response of hermit crabs <i>Clibanarius striolatus</i> towards <b>1</b> .....                                              | S4      |
| Figure S6. Negative ionization mode HRESIMS spectrum of <b>1</b> .....                                                                | S5      |
| Figure S7. Negative ionization mode HRESIMS spectrum of <b>2</b> .....                                                                | S5      |
| Figure S8. Negative ionization mode HRESIMS spectrum of glycone from <b>1</b> .....                                                   | S6      |
| Table S2. Electronic energies ( $\Delta E$ ), free energies ( $\Delta G$ ), and Boltzmann population for conformers of <b>1</b> ..... | S6      |
| Table S3. Electronic energies ( $\Delta E$ ), free energies ( $\Delta G$ ), and Boltzmann population for conformers of <b>1</b> ..... | S6      |
| Figure S9. Lowest energy conformations of 1'S,2'R,3'S,4'S,5'R,1S,3R,6S,7R,10S,11S,14S – <b>1</b> .....                                | S7      |
| Figure S10. Lowest energy conformations of 1'S,2'R,3'S,4'S,5'R,1R,3S,6R,7S,10R,11R,14R – <b>1</b> .....                               | S8      |
| Figure S11. Overlay of lowest energy conformations for <b>1</b> .....                                                                 | S9      |
| Figure S12. Experimental and calculated distances between H-15 and H <sub>3</sub> -18 for <b>1</b> .....                              | S9      |
| Tables S4–S9. Atomic coordinates and NMR shielding tensors for <b>1</b> .....                                                         | S10–S17 |
| Figure S13. Experimental and calculated VCD spectra for <b>1</b> .....                                                                | S18     |
| Table S10. 1D, 2D NMR correlations for <b>2</b> .....                                                                                 | S19     |
| Figures S14–S21. NMR data for <b>1</b> .....                                                                                          | S20–S27 |
| Figures S22–S28. NMR data for <b>2</b> .....                                                                                          | S28–S34 |
| Figures S29–S37. 1D ROESY data extracted from 2D ROESY NMR spectrum.....                                                              | S35–S43 |
| Figure S38. Comparison of <sup>1</sup> H NMR spectra of G-1163 and G-1588.....                                                        | S44     |
| References.....                                                                                                                       | S45     |

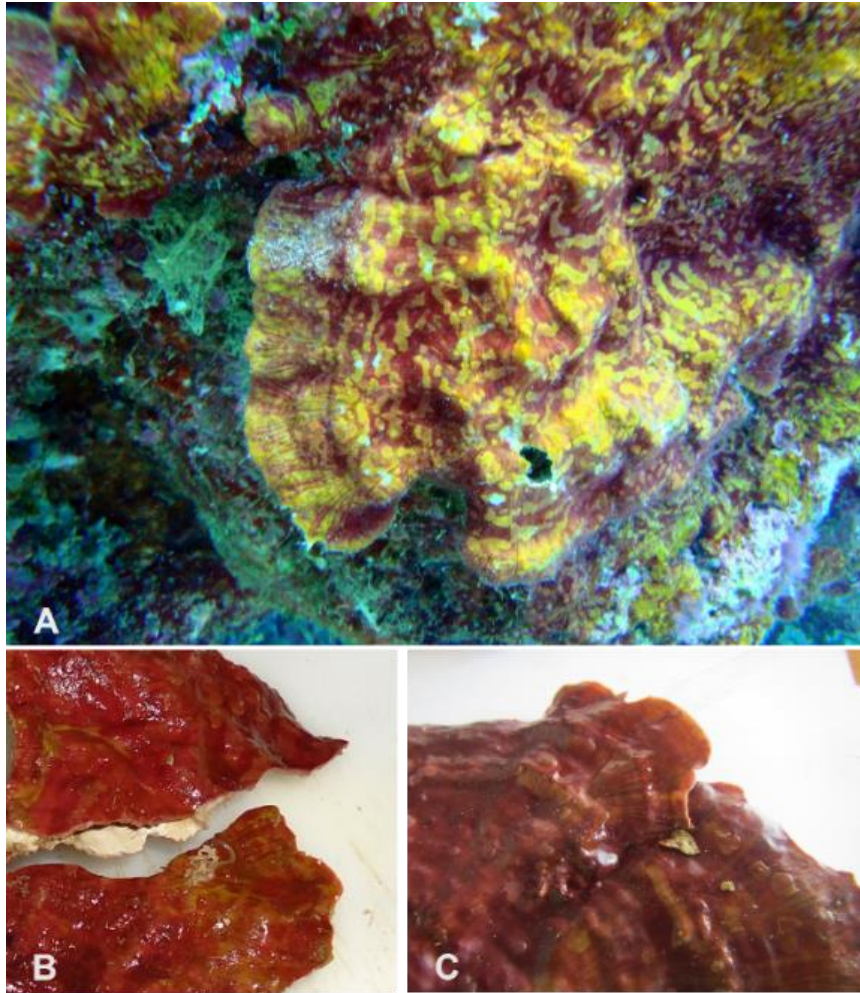

**Figure S1.** **A:** *Peyssonnelia* sp. (G-1163) growing on a reef slope. **B:** Close-up of the surface of G-1163, **C:** Surface of G-1588 showing analogous morphology with calcified texture and intermittent tinges of yellow on a red surface.

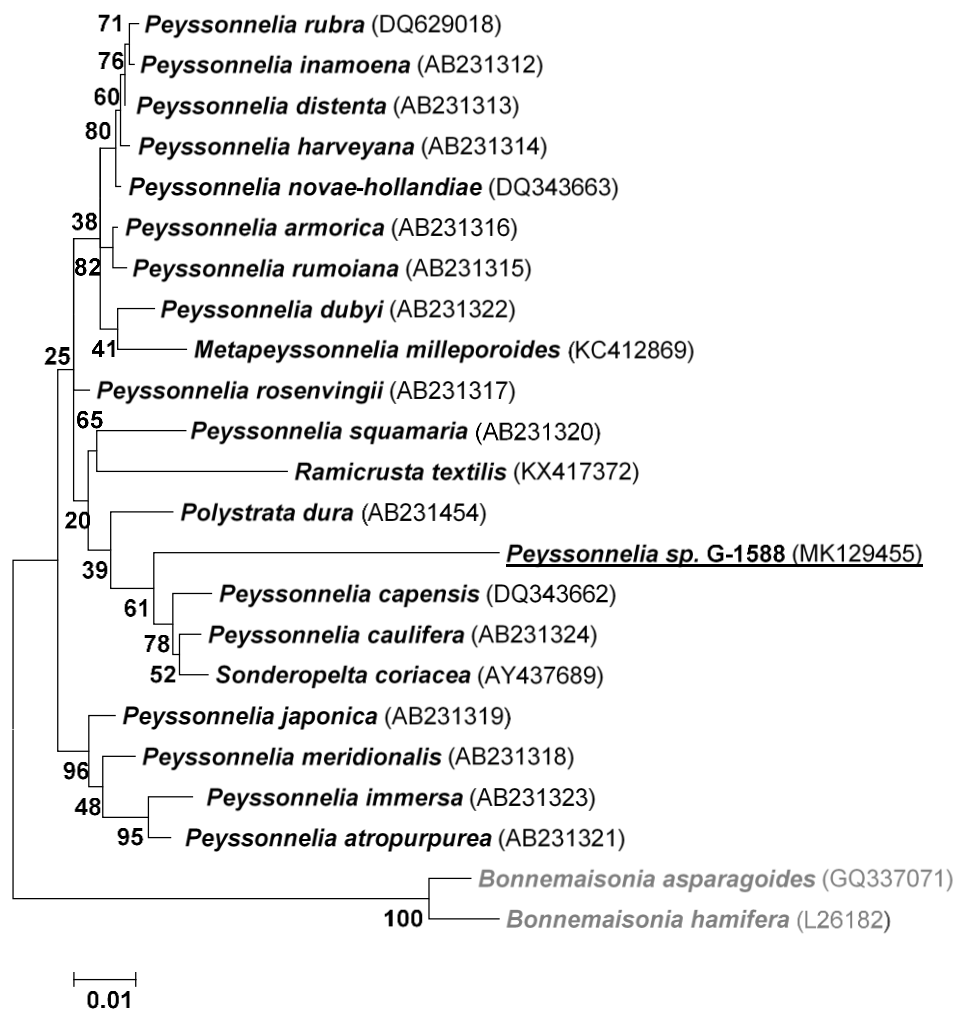

**Figure S2.** Evolutionary relationship of *Peyssonnelia* sp. G-1588 with related red algal species from family Peyssonneliaceae was inferred by the 18S small subunit (SSU) rRNA sequences using the Maximum Likelihood method based on the Kimura 2-parameter model<sup>1</sup> in MEGA X.<sup>2</sup> The percentage of replicate trees in which the associated species clustered together in the bootstrap test (1000 iterations) is shown next to the branches. The accession numbers of the SSU rRNA of respective red algae are mentioned in parentheses. The outgroup taxa are represented in gray. The SSU rRNA sequence from *Peyssonnelia* sp. used in this study is underlined. The tree is drawn to scale, with branch lengths measured in the number of substitutions per site.

**Table S1.** Bioassay results for peyssonosides A-B (1–2).

| Strain/cell line                                                      | 1 <sup>[a]</sup> | 2 <sup>[a]</sup> | Positive Control |
|-----------------------------------------------------------------------|------------------|------------------|------------------|
| Methicillin-resistant <i>Staphylococcus aureus</i> (MRSA, ATCC 33591) | 16.7±0.3         | >50              | <1               |
| Vancomycin-resistant <i>Enterococcus faecium</i> (VREF, ATCC 700221)  | >50              | >50              | <7.8             |
| <i>Escherichia coli</i> (EC, ATCC 25922)                              | >50              | >50              | <7.8             |
| Multidrug-resistant <i>Escherichia coli</i> (MDREC, ATCC BAA-1743)    | >50              | >50              | <15.6            |
| Amphotericin B-resistant <i>Candida albicans</i> (ARCA, ATCC 90873)   | >50              | >50              | >50              |
| <i>Enterobacter cloacae</i> (CDC0008)                                 | >50              | >50              | <0.5             |
| <i>Klebsiella pneumoniae</i> (CDC0016)                                | >50              | >50              | <0.5             |
| <i>Acinetobacter baumannii</i> (CDC0033)                              | >50              | >50              | >50              |
| <i>Enterococcus faecium</i> (HM-959)                                  | >50              | >50              | 32               |
| <i>Pseudomonas aeruginosa</i> (PA01)                                  | >50              | >50              | <0.5             |
| <i>Mycobacterium tuberculosis</i> (H37Rv)                             | >50              | >50              | 0.07             |
| <i>Plasmodium berghei</i> (exoerythrocytic stage)                     | 2.4              | 5.8              | 0.0003           |
| <i>Plasmodium falciparum</i> (Dd2L)                                   | >6.25            | >6.25            | 0.003            |
| <i>Plasmodium falciparum</i> (D10)                                    | >6.25            | >6.25            | 0.007            |
| HEK293T cell line                                                     | >10              | >9               | 1.3              |

<sup>[a]</sup> Antibacterial activity reported as MIC (µg/ml), antiplasmodial activity reported as EC<sub>50</sub> (µM), cytotoxicity against HEK293T cell line reported as CC<sub>50</sub> (µM)

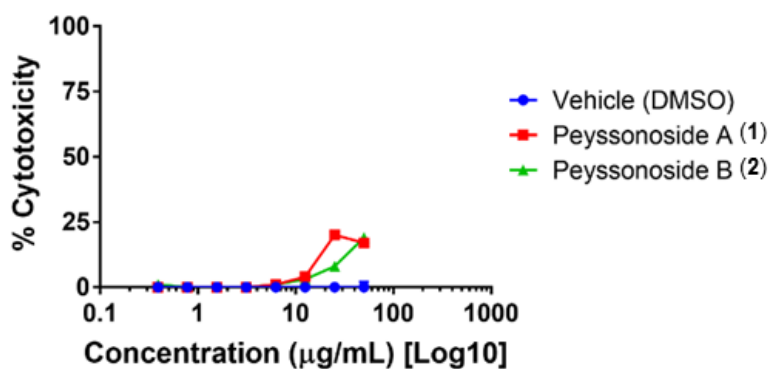

**Figure S3.** Cytotoxicity of 1–2 against human keratinocytes (HaCaT). Relative cytotoxicity (%) were less than 25% for both 1–2 at highest concentration of 50 µg/ml.

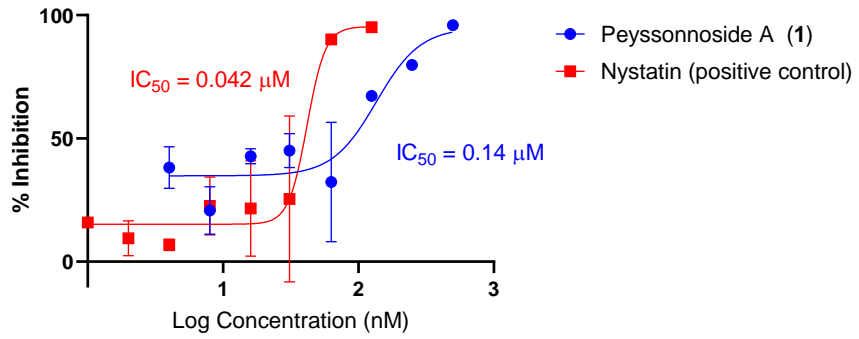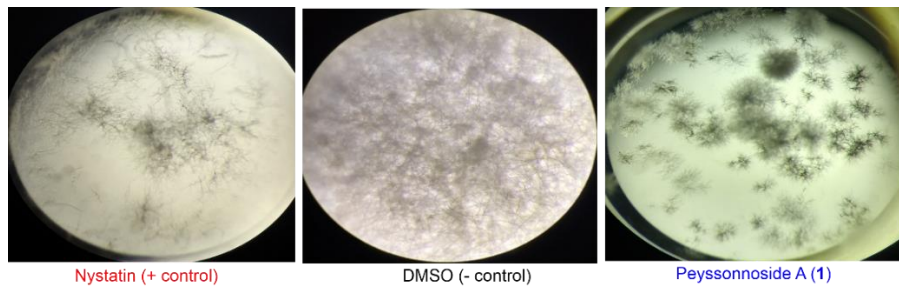

**Figure S4. Top:** Percent growth inhibition after 3 days incubation of the fungus *D. salina* with peyssonnoside A (**1**) and the antifungal drug nystatin (n = 3, mean ± standard error). **Bottom:** Comparison of fungal growth in the presence of nystatin, DMSO, and **1** showing the morphological change in the fungus exposed to **1**.

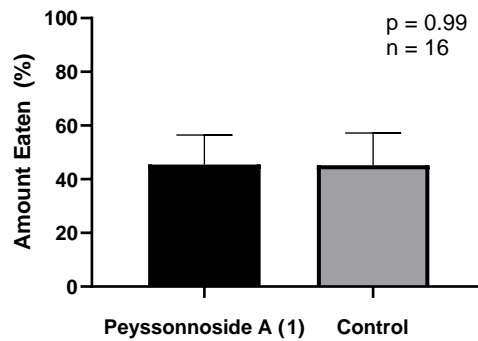

**Figure S5.** Response of hermit crabs *Clibanarius striolatus* to food laced with 1 mg/mL peyssonnoside A (**1**). These data indicate that **1** does not deter hermit crab feeding (mean ± standard error).

HRESIMS spectra of peyssonnosides A–B (1–2)

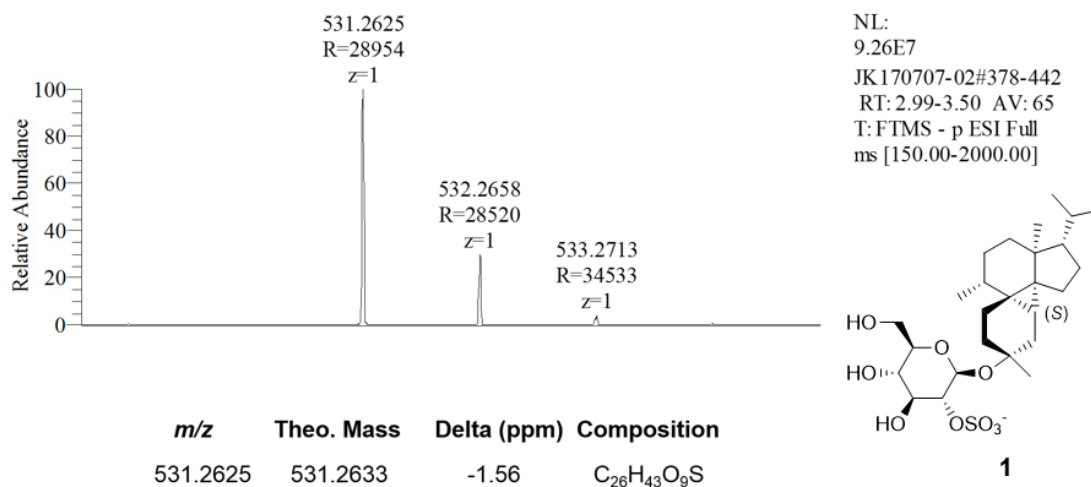

Figure S6. Negative ionization mode HRESIMS spectrum of peyssonnoside A (1)

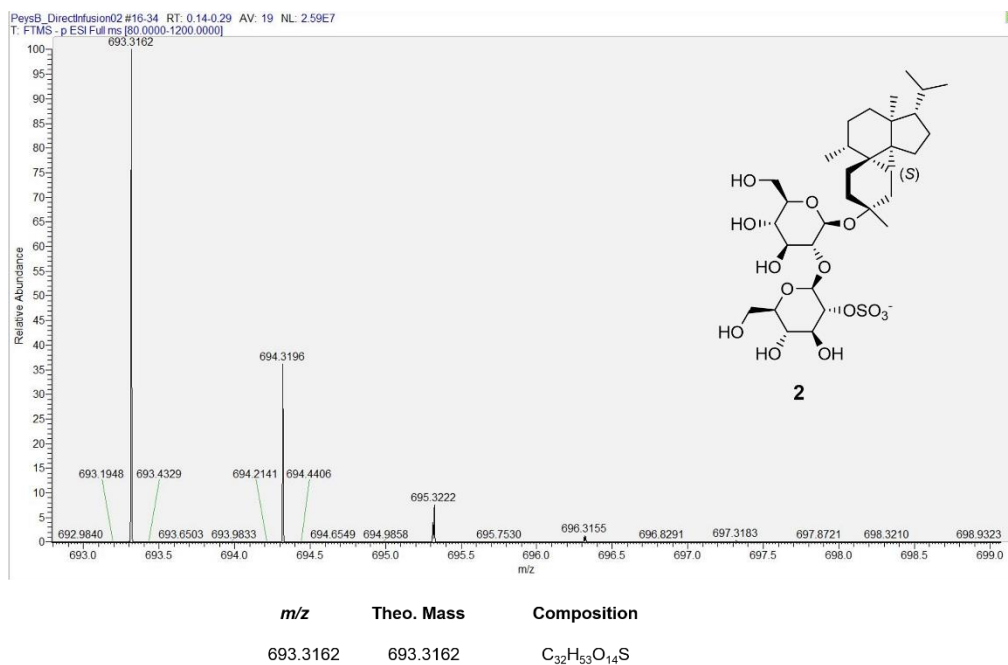

Figure S7. Negative ionization mode HRESIMS spectrum of peyssonnoside B (2)

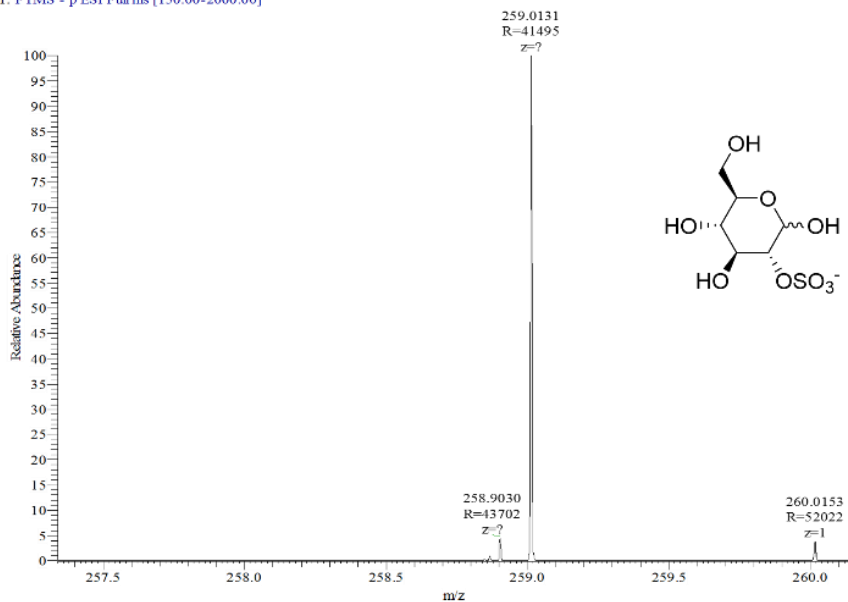

| <i>m/z</i> | Theo. Mass | Composition                                     |
|------------|------------|-------------------------------------------------|
| 259.0131   | 259.0129   | C <sub>8</sub> H <sub>11</sub> O <sub>8</sub> S |

**Figure S8.** Negative ionization mode HRESIMS spectrum of the glycone from peyssonnoside A (**1**)

#### DFT calculation result for peyssonnoside A (**1**)

**Table S2.** Electronic energies ( $\Delta E$ ), free energies ( $\Delta G$ ), and Boltzmann population for conformers of **1** obtained from DFT calculations using B3LYP/6-311++G(2d,2p) level of theory in DMSO.

| Conformers                                     | Energies (Hartree) |              | Abundance (%) |
|------------------------------------------------|--------------------|--------------|---------------|
|                                                | $\Delta E$         | $\Delta G$   |               |
| 1'S,2'R,3'S,4'S,5'R,1S,3R,6S,7R,10S,11S,14S-1a | -2092.56129910     | -2091.949211 | 23.2          |
| 1'S,2'R,3'S,4'S,5'R,1S,3R,6S,7R,10S,11S,14S-1b | -2092.56084250     | -2091.947305 | 3.1           |
| 1'S,2'R,3'S,4'S,5'R,1S,3R,6S,7R,10S,11S,14S-1c | -2092.56069863     | -2091.950226 | 68.1          |
| 1'S,2'R,3'S,4'S,5'R,1S,3R,6S,7R,10S,11S,14S-1d | -2092.56092083     | -2091.947645 | 4.4           |
| 1'S,2'R,3'S,4'S,5'R,1S,3R,6S,7R,10S,11S,14S-1e | -2092.55665119     | -2091.946428 | 1.2           |

**Table S3.** Electronic energies ( $\Delta E$ ), free energies ( $\Delta G$ ), and Boltzmann population for conformers of **1** obtained from DFT calculations using B3LYP/6-311++G(2d,2p) level of theory in DMSO.

| Conformers                                     | Energies (Hartree) |              | Abundance (%) |
|------------------------------------------------|--------------------|--------------|---------------|
|                                                | $\Delta E$         | $\Delta G$   |               |
| 1'S,2'R,3'S,4'S,5'R,1R,3S,6R,7S,10R,11R,14R-1a | -2092.56127660     | -2091.948773 | 34.0          |
| 1'S,2'R,3'S,4'S,5'R,1R,3S,6R,7S,10R,11R,14R-1b | -2092.56063950     | -2091.948144 | 17.5          |
| 1'S,2'R,3'S,4'S,5'R,1R,3S,6R,7S,10R,11R,14R-1c | -2092.55989244     | -2091.948091 | 16.5          |
| 1'S,2'R,3'S,4'S,5'R,1R,3S,6R,7S,10R,11R,14R-1d | -2092.55890251     | -2091.947022 | 5.3           |
| 1'S,2'R,3'S,4'S,5'R,1R,3S,6R,7S,10R,11R,14R-1e | -2092.56055234     | -2091.948548 | 26.8          |



Lowest energy conformations of peyssonnoside A (1)

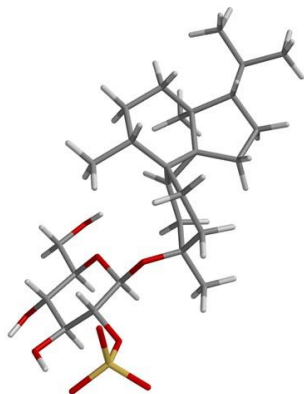

1'S,2'R,3'S,4'S,5'R,1S,3R,6S,7R,10S,11S,14S-1a

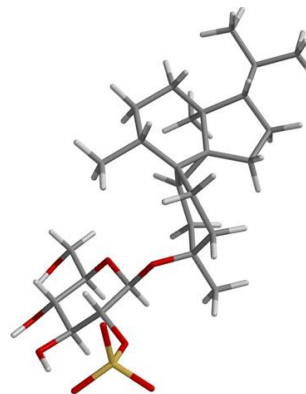

1'S,2'R,3'S,4'S,5'R,1S,3R,6S,7R,10S,11S,14S-1b

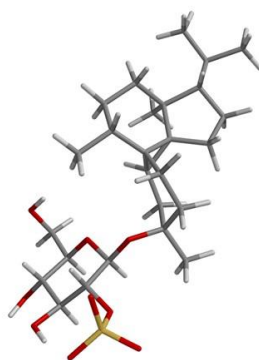

1'S,2'R,3'S,4'S,5'R,1S,3R,6S,7R,10S,11S,14S-1c

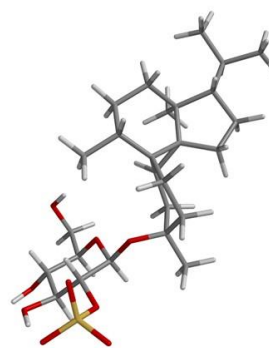

1'S,2'R,3'S,4'S,5'R,1S,3R,6S,7R,10S,11S,14S-1d

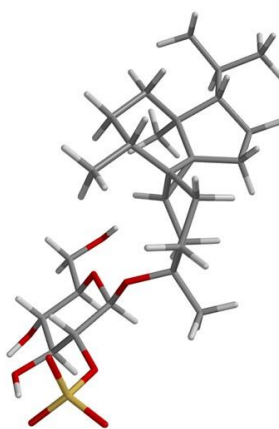

1'S,2'R,3'S,4'S,5'R,1S,3R,6S,7R,10S,11S,14S-1e

Figure S9. Lowest energy conformations of 1'S,2'R,3'S,4'S,5'R,1S,3R,6S,7R,10S,11S,14S – peyssonnoside A (1).

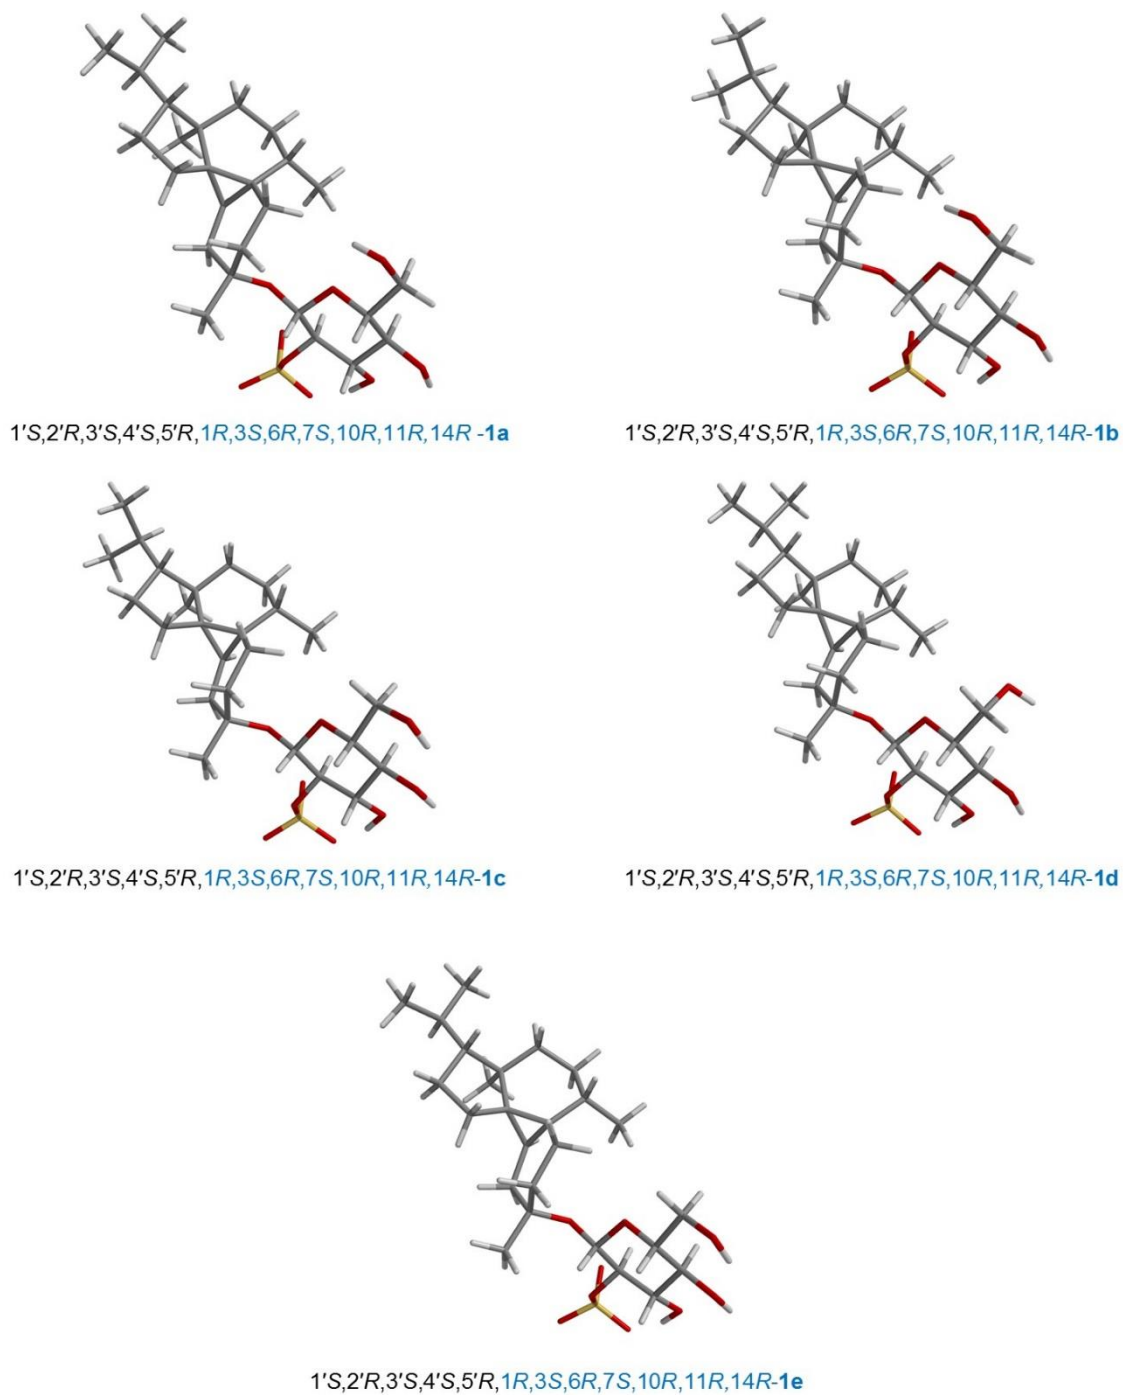

**Figure S10.** Lowest energy conformations of 1'S,2'R,3'S,4'S,5'R,1R,3S,6R,7S,10R,11R,14R – peyssonnoside A (1)

Overlay of lowest energy conformations of peyssonnoside A (**1**)

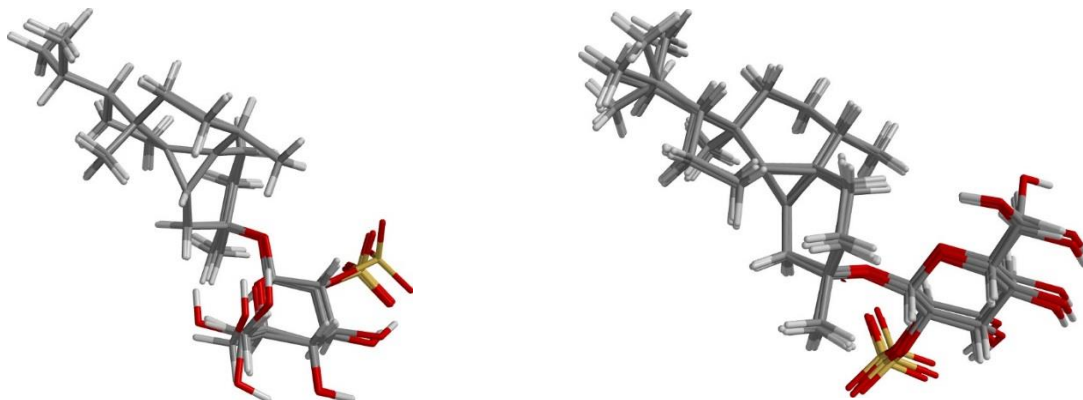

**Figure S11.** Left: Overlay of lowest energy conformations of 1'S,2'R,3'S,4'S,5'R,1S,3R,6S,7R,10S,11S,14S – peyssonnoside A (**1**) and right: 1'S,2'R,3'S,4'S,5'R,1R,3S,6R,7S,10R,11R,14R – peyssonnoside A (**1**)

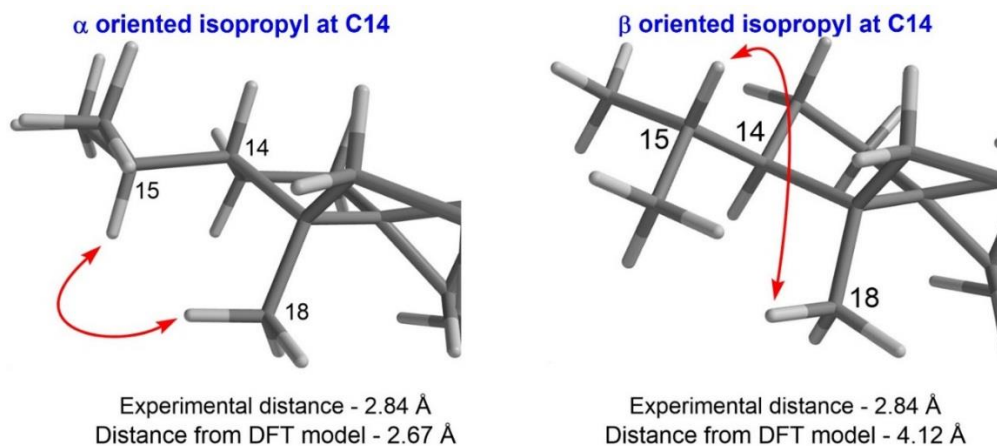

**Figure S12.** Experimental and calculated distances between H-15 and H<sub>3</sub>-18 with isopropyl oriented  $\alpha$  or  $\beta$  at C-14 for **1**.

**Table S4.** Atomic coordinates and NMR shielding tensors for peyssonoside A (1), obtained from DFT calculations at B3LYP/6-311++G(2d,2p) level of theory using DMSO as solvent.

| Atom | <i>1'S,2'R,3'S,4'S,5'R,1S,3R,6S,7R,10S,11S,14S-1a</i> |          |          |           | <i>1'S,2'R,3'S,4'S,5'R,1S,3R,6S,7R,10S,11S,14S-1b</i> |          |          |           |
|------|-------------------------------------------------------|----------|----------|-----------|-------------------------------------------------------|----------|----------|-----------|
|      | <i>x</i>                                              | <i>y</i> | <i>z</i> | Shielding | <i>x</i>                                              | <i>y</i> | <i>z</i> | Shielding |
| C    | 1.6780                                                | -0.4133  | -1.1156  | 140.267   | 3.1060                                                | -0.4057  | -0.1335  | 140.058   |
| C    | 1.7370                                                | -1.6623  | -2.0037  | 154.202   | 3.5650                                                | -1.5426  | -1.0535  | 154.149   |
| H    | 0.7649                                                | -1.9706  | -2.3843  | 30.461    | 2.9421                                                | -1.6621  | -1.9378  | 30.524    |
| H    | 2.1349                                                | -2.5097  | -1.4401  | 30.366    | 3.5384                                                | -2.4965  | -0.5208  | 30.387    |
| C    | 2.6962                                                | -1.3196  | -3.1417  | 149.469   | 5.0083                                                | -1.2153  | -1.4296  | 149.132   |
| H    | 3.1547                                                | -2.2120  | -3.5642  | 29.904    | 5.5673                                                | -2.1097  | -1.6990  | 29.900    |
| H    | 2.1679                                                | -0.8146  | -3.9553  | 30.428    | 5.0407                                                | -0.5440  | -2.2924  | 30.430    |
| C    | 2.8297                                                | 0.5534   | -1.5817  | 134.931   | 4.3834                                                | 0.4213   | 0.2700   | 135.213   |
| C    | 3.7150                                                | -0.3639  | -2.5080  | 115.126   | 5.5723                                                | -0.5036  | -0.1933  | 115.435   |
| H    | 4.3447                                                | -0.9613  | -1.8366  | 30.730    | 5.6932                                                | -1.2634  | 0.5893   | 30.760    |
| C    | 3.6275                                                | 1.0814   | -0.3710  | 140.129   | 4.4134                                                | 0.6740   | 1.7914   | 139.946   |
| H    | 4.3084                                                | 0.2992   | -0.0228  | 30.792    | 4.7298                                                | -0.2417  | 2.2998   | 30.915    |
| H    | 4.2516                                                | 1.9216   | -0.6737  | 30.294    | 5.1587                                                | 1.4325   | 2.0290   | 30.303    |
| C    | 2.7447                                                | 1.5022   | 0.7987   | 153.813   | 3.0631                                                | 1.0962   | 2.3599   | 153.300   |
| H    | 2.0398                                                | 2.2783   | 0.4872   | 30.998    | 2.7062                                                | 2.0046   | 1.8655   | 31.002    |
| H    | 3.3604                                                | 1.9574   | 1.5779   | 30.610    | 3.1747                                                | 1.3583   | 3.4145   | 30.603    |
| C    | 1.9865                                                | 0.3174   | 1.4055   | 142.803   | 2.0121                                                | -0.0118  | 2.2410   | 143.471   |
| H    | 2.7421                                                | -0.3403  | 1.8539   | 30.384    | 2.3377                                                | -0.8243  | 2.9030   | 30.402    |
| C    | 1.2578                                                | -0.5317  | 0.3522   | 153.185   | 1.9360                                                | -0.6191  | 0.8314   | 152.690   |
| C    | 0.3426                                                | 0.1512   | -0.6354  | 164.998   | 1.7692                                                | 0.2982   | -0.3559  | 164.865   |
| H    | 0.3151                                                | 1.2291   | -0.5572  | 31.263    | 1.7709                                                | 1.3524   | -0.1182  | 31.327    |
| C    | 0.8247                                                | -1.8939  | 0.8952   | 158.547   | 1.1843                                                | -1.9507  | 0.8100   | 158.216   |
| H    | 1.6690                                                | -2.5892  | 0.8620   | 30.418    | 1.8575                                                | -2.7586  | 1.1129   | 30.444    |
| H    | 0.5846                                                | -1.7701  | 1.9499   | 29.670    | 0.4107                                                | -1.9070  | 1.5750   | 29.731    |
| C    | -0.3870                                               | -2.5513  | 0.2149   | 145.568   | 0.5096                                                | -2.3388  | -0.5160  | 145.379   |
| H    | -0.0878                                               | -3.0483  | -0.7057  | 30.863    | 1.2339                                                | -2.7729  | -1.2024  | 30.853    |
| H    | -0.7864                                               | -3.3272  | 0.8703   | 30.332    | -0.2377                                               | -3.1107  | -0.3237  | 30.345    |
| C    | -1.5193                                               | -1.5835  | -0.1378  | 101.503   | -0.1689                                               | -1.1765  | -1.2461  | 101.659   |
| C    | -0.9976                                               | -0.4519  | -1.0420  | 150.735   | 0.8423                                                | -0.0472  | -1.5162  | 151.135   |
| H    | -1.7506                                               | 0.3343   | -1.0774  | 29.632    | 0.2923                                                | 0.8454   | -1.8096  | 29.493    |
| H    | -0.9421                                               | -0.8506  | -2.0576  | 30.662    | 1.4246                                                | -0.3402  | -2.3931  | 30.758    |
| C    | 4.6608                                                | 0.2928   | -3.5426  | 147.796   | 6.9682                                                | 0.1210   | -0.4315  | 147.613   |
| H    | 4.0513                                                | 0.8939   | -4.2235  | 30.229    | 6.8675                                                | 0.8873   | -1.2054  | 30.229    |
| C    | 5.3664                                                | -0.7775  | -4.3935  | 158.496   | 7.9553                                                | -0.9319  | -0.9652  | 158.393   |
| H    | 5.9416                                                | -1.4599  | -3.7622  | 31.182    | 8.0496                                                | -1.7673  | -0.2663  | 31.201    |
| H    | 6.0616                                                | -0.3094  | -5.0922  | 30.925    | 8.9466                                                | -0.4933  | -1.0902  | 30.941    |
| H    | 4.6654                                                | -1.3727  | -4.9761  | 30.509    | 7.6505                                                | -1.3357  | -1.9291  | 30.514    |
| C    | 5.7266                                                | 1.2126   | -2.9288  | 160.824   | 7.5825                                                | 0.7837   | 0.8101   | 160.861   |
| H    | 6.3222                                                | 0.6791   | -2.1843  | 31.102    | 7.6451                                                | 0.0764   | 1.6404   | 31.120    |
| H    | 5.2991                                                | 2.0886   | -2.4467  | 30.438    | 7.0151                                                | 1.6467   | 1.1504   | 30.442    |
| H    | 6.4083                                                | 1.5675   | -3.7038  | 30.990    | 8.5957                                                | 1.1258   | 0.5915   | 31.017    |
| C    | -2.6571                                               | -2.3453  | -0.8227  | 156.522   | -0.7873                                               | -1.6772  | -2.5539  | 156.629   |
| H    | -3.4374                                               | -1.6829  | -1.1971  | 30.174    | -1.1813                                               | -0.8669  | -3.1670  | 30.166    |
| H    | -3.1073                                               | -3.0589  | -0.1339  | 30.881    | -1.5921                                               | -2.3829  | -2.3509  | 30.918    |
| H    | -2.2639                                               | -2.8934  | -1.6779  | 31.022    | -0.0258                                               | -2.1850  | -3.1445  | 31.003    |
| O    | -1.9572                                               | -1.0687  | 1.1647   | 201.426   | -1.2179                                               | -0.7448  | -0.3145  | 201.014   |
| C    | -3.0815                                               | -0.2724  | 1.2527   | 82.032    | -2.1473                                               | 0.1970   | -0.7065  | 81.823    |
| H    | -3.7768                                               | -0.4411  | 0.4255   | 26.982    | -2.3150                                               | 0.1918   | -1.7875  | 26.995    |
| O    | -2.6809                                               | 1.1052   | 1.2364   | 223.909   | -1.6799                                               | 1.4997   | -0.3279  | 226.660   |
| C    | -3.7870                                               | -0.5661  | 2.5868   | 98.371    | -3.4716                                               | -0.0937  | 0.0193   | 98.218    |
| H    | -3.0460                                               | -0.5127  | 3.3840   | 27.757    | -3.2594                                               | -0.2163  | 1.0811   | 27.805    |
| C    | -4.9326                                               | 0.4194   | 2.8293   | 100.309   | -4.4866                                               | 1.0298   | -0.2120  | 100.924   |
| H    | -5.7172                                               | 0.2069   | 2.0928   | 27.974    | -4.7972                                               | 0.9920   | -1.2631  | 27.931    |
| C    | -4.4819                                               | 1.8626   | 2.6342   | 105.473   | -3.8633                                               | 2.3938   | 0.0509   | 99.144    |
| H    | -3.7730                                               | 2.1158   | 3.4299   | 28.337    | -3.6379                                               | 2.4765   | 1.1188   | 28.021    |
| C    | -3.7804                                               | 2.0201   | 1.2884   | 102.635   | -2.5577                                               | 2.5509   | -0.7270  | 106.702   |

|   |         |         |         |         |         |         |         |         |
|---|---------|---------|---------|---------|---------|---------|---------|---------|
| H | -4.4848 | 1.8008  | 0.4770  | 28.197  | -2.7602 | 2.4911  | -1.8034 | 28.228  |
| C | -3.2030 | 3.4096  | 1.0833  | 114.356 | -1.8407 | 3.8681  | -0.4379 | 111.388 |
| H | -4.0021 | 4.1451  | 1.1228  | 27.740  | -1.7138 | 3.9847  | 0.6431  | 27.757  |
| H | -2.4903 | 3.6268  | 1.8848  | 28.019  | -0.8530 | 3.8379  | -0.8940 | 27.880  |
| O | -2.5807 | 3.5465  | -0.1930 | 303.181 | -2.5215 | 4.9895  | -0.9963 | 301.252 |
| H | -1.9115 | 2.8568  | -0.2608 | 29.951  | -3.4500 | 4.9189  | -0.7349 | 28.704  |
| O | -4.3081 | -1.9072 | 2.4891  | 100.624 | -3.9743 | -1.3300 | -0.5265 | 100.936 |
| O | -5.4722 | 0.3382  | 4.1431  | 274.055 | -5.6275 | 0.9341  | 0.6320  | 274.684 |
| H | -5.5843 | -0.6019 | 4.3847  | 25.521  | -5.9399 | 0.0084  | 0.6390  | 25.518  |
| O | -5.5985 | 2.7496  | 2.6782  | 290.675 | -4.7576 | 3.4445  | -0.3332 | 290.537 |
| H | -6.1006 | 2.5368  | 3.4735  | 29.492  | -5.5829 | 3.3214  | 0.1496  | 29.159  |
| C | 2.2512  | 1.7347  | -2.3846 | 165.254 | 4.4186  | 1.7649  | -0.4845 | 165.247 |
| H | 1.6527  | 1.3915  | -3.2291 | 31.119  | 4.3645  | 1.6221  | -1.5644 | 31.131  |
| H | 3.0428  | 2.3758  | -2.7719 | 31.231  | 5.3308  | 2.3189  | -0.2638 | 31.184  |
| H | 1.6083  | 2.3594  | -1.7668 | 30.959  | 3.5820  | 2.4017  | -0.2025 | 30.953  |
| C | 1.0700  | 0.8114  | 2.5330  | 163.972 | 0.6604  | 0.4985  | 2.7586  | 164.118 |
| H | 1.6522  | 1.3537  | 3.2805  | 31.031  | 0.7611  | 0.8582  | 3.7844  | 31.016  |
| H | 0.5547  | -0.0014 | 3.0422  | 30.344  | -0.1091 | -0.2720 | 2.7535  | 30.415  |
| H | 0.3118  | 1.4914  | 2.1429  | 31.190  | 0.3034  | 1.3285  | 2.1475  | 31.309  |
| S | -4.2963 | -2.8840 | 3.8269  | 121.367 | -4.7638 | -2.3956 | 0.4660  | 121.340 |
| O | -5.3723 | -2.3588 | 4.6943  | 93.450  | -4.8213 | -3.5816 | -0.3799 | 115.525 |
| O | -2.9660 | -2.7586 | 4.4203  | 111.323 | -6.0853 | -1.7811 | 0.7152  | 93.298  |
| O | -4.6037 | -4.1802 | 3.2346  | 115.575 | -3.9490 | -2.5179 | 1.6737  | 111.380 |

**Table S5.** Atomic coordinates and NMR shielding tensors for peyssonoside A (**1**), obtained from DFT calculations at B3LYP/6-311++G(2d,2p) level of theory using DMSO as solvent.

| Atom | <i>1'S,2'R,3'S,4'S,5'R,1S,3R,6S,7R,10S,11S,14S-1c</i> |          |          |           | <i>1'S,2'R,3'S,4'S,5'R,1S,3R,6S,7R,10S,11S,14S-1d</i> |          |          |           |
|------|-------------------------------------------------------|----------|----------|-----------|-------------------------------------------------------|----------|----------|-----------|
|      | <i>x</i>                                              | <i>y</i> | <i>z</i> | Shielding | <i>x</i>                                              | <i>y</i> | <i>z</i> | Shielding |
| C    | 3.0675                                                | -0.4531  | -0.1125  | 140.810   | 3.0478                                                | -0.4071  | -0.1884  | 140.509   |
| C    | 3.5127                                                | -1.7279  | -0.8371  | 154.457   | 3.5597                                                | -1.4960  | -1.1371  | 154.219   |
| H    | 2.8841                                                | -1.9839  | -1.6881  | 30.515    | 2.9815                                                | -1.5772  | -2.0556  | 30.566    |
| H    | 3.4803                                                | -2.5827  | -0.1566  | 30.336    | 3.5139                                                | -2.4743  | -0.6516  | 30.359    |
| C    | 4.9578                                                | -1.4784  | -1.2608  | 149.359   | 5.0179                                                | -1.1442  | -1.4208  | 149.031   |
| H    | 5.5068                                                | -2.4093  | -1.3917  | 29.905    | 5.5950                                                | -2.0199  | -1.7122  | 29.880    |
| H    | 4.9960                                                | -0.9455  | -2.2151  | 30.422    | 5.0901                                                | -0.4236  | -2.2404  | 30.419    |
| C    | 4.3552                                                | 0.4108   | 0.1616   | 134.015   | 4.2986                                                | 0.3952   | 0.3318   | 134.897   |
| C    | 5.5297                                                | -0.5953  | -0.1449  | 115.460   | 5.5125                                                | -0.5048  | -0.1171  | 115.101   |
| H    | 5.6313                                                | -1.2281  | 0.7459   | 30.738    | 5.5896                                                | -1.3084  | 0.6262   | 30.719    |
| C    | 4.3845                                                | 0.8991   | 1.6247   | 140.578   | 4.2417                                                | 0.5605   | 1.8647   | 139.458   |
| H    | 4.6838                                                | 0.0694   | 2.2718   | 30.857    | 4.5253                                                | -0.3848  | 2.3367   | 30.923    |
| H    | 5.1418                                                | 1.6732   | 1.7443   | 30.238    | 4.9745                                                | 1.2994   | 2.1876   | 30.319    |
| C    | 3.0392                                                | 1.4259   | 2.1124   | 153.131   | 2.8614                                                | 0.9579   | 2.3776   | 152.811   |
| H    | 2.6978                                                | 2.2499   | 1.4790   | 30.920    | 2.5354                                                | 1.8930   | 1.9126   | 30.984    |
| H    | 3.1511                                                | 1.8488   | 3.1134   | 30.548    | 2.9123                                                | 1.1622   | 3.4495   | 30.614    |
| C    | 1.9736                                                | 0.3267   | 2.1628   | 142.179   | 1.8183                                                | -0.1377  | 2.1373   | 143.108   |
| H    | 2.2833                                                | -0.3727  | 2.9497   | 30.464    | 2.0996                                                | -0.9840  | 2.7768   | 30.384    |
| C    | 1.8955                                                | -0.4985  | 0.8696   | 154.239   | 1.8291                                                | -0.6732  | 0.6976   | 152.558   |
| C    | 1.7370                                                | 0.2183   | -0.4494  | 164.553   | 1.7214                                                | 0.3047   | -0.4480  | 164.478   |
| H    | 1.7459                                                | 1.2972   | -0.3816  | 31.309    | 1.7051                                                | 1.3450   | -0.1555  | 31.346    |
| C    | 1.1342                                                | -1.8092  | 1.0642   | 158.479   | 1.0914                                                | -2.0063  | 0.5680   | 158.134   |
| H    | 1.8040                                                | -2.5677  | 1.4806   | 30.339    | 1.7631                                                | -2.8274  | 0.8364   | 30.451    |
| H    | 0.3728                                                | -1.6402  | 1.8240   | 29.708    | 0.2974                                                | -2.0179  | 1.3125   | 29.744    |
| C    | 0.4352                                                | -2.3904  | -0.1753  | 145.214   | 0.4551                                                | -2.3111  | -0.7985  | 144.988   |
| H    | 1.1406                                                | -2.9493  | -0.7876  | 30.858    | 1.1974                                                | -2.7080  | -1.4892  | 30.877    |
| H    | -0.3260                                               | -3.1035  | 0.1457   | 30.377    | -0.3009                                               | -3.0886  | -0.6748  | 30.310    |
| C    | -0.2267                                               | -1.3479  | -1.0811  | 101.061   | -0.1917                                               | -1.0986  | -1.4742  | 101.710   |
| C    | 0.8050                                                | -0.3010  | -1.5389  | 151.838   | 0.8519                                                | 0.0163   | -1.6664  | 150.769   |

|   |         |         |         |         |         |         |         |         |
|---|---------|---------|---------|---------|---------|---------|---------|---------|
| H | 0.2727  | 0.5398  | -1.9811 | 29.656  | 0.3335  | 0.9273  | -1.9583 | 29.321  |
| H | 1.3792  | -0.7501 | -2.3528 | 30.772  | 1.4704  | -0.2663 | -2.5216 | 30.809  |
| C | 6.9398  | -0.0411 | -0.4616 | 147.507 | 6.9195  | 0.1275  | -0.2408 | 147.706 |
| H | 6.8625  | 0.5995  | -1.3447 | 30.215  | 6.8626  | 0.9386  | -0.9723 | 30.227  |
| C | 7.9085  | -1.1836 | -0.8145 | 158.580 | 7.9341  | -0.8960 | -0.7802 | 158.289 |
| H | 7.9795  | -1.9004 | 0.0078  | 31.159  | 7.6819  | -1.2424 | -1.7810 | 30.534  |
| H | 8.9097  | -0.7897 | -0.9959 | 30.929  | 7.9899  | -1.7707 | -0.1268 | 31.211  |
| H | 7.6026  | -1.7278 | -1.7064 | 30.490  | 8.9308  | -0.4543 | -0.8255 | 30.918  |
| C | 7.5583  | 0.7900  | 0.6720  | 160.702 | 7.4636  | 0.7123  | 1.0709  | 160.780 |
| H | 7.5909  | 0.2186  | 1.6027  | 31.087  | 7.4736  | -0.0427 | 1.8606  | 31.110  |
| H | 7.0130  | 1.7105  | 0.8669  | 30.420  | 6.8815  | 1.5587  | 1.4274  | 30.421  |
| H | 8.5834  | 1.0665  | 0.4194  | 30.908  | 8.4895  | 1.0578  | 0.9320  | 31.001  |
| C | -0.8682 | -2.0445 | -2.2843 | 156.671 | -0.7987 | -1.5119 | -2.8163 | 157.288 |
| H | -1.2515 | -1.3389 | -3.0211 | 30.268  | -0.0384 | -2.0092 | -3.4174 | 30.912  |
| H | -1.6859 | -2.6874 | -1.9606 | 30.943  | -1.1572 | -0.6596 | -3.3933 | 30.222  |
| H | -0.1242 | -2.6611 | -2.7871 | 31.066  | -1.6251 | -2.2070 | -2.6691 | 30.914  |
| O | -1.2583 | -0.7451 | -0.2289 | 202.827 | -1.2356 | -0.6877 | -0.5281 | 201.850 |
| C | -2.1527 | 0.1590  | -0.7669 | 81.966  | -2.2007 | 0.2245  | -0.9005 | 81.442  |
| H | -2.2886 | 0.0165  | -1.8430 | 26.969  | -2.4637 | 0.1424  | -1.9593 | 26.945  |
| O | -1.6610 | 1.4873  | -0.5458 | 226.107 | -1.7162 | 1.5530  | -0.6581 | 226.067 |
| C | -3.5044 | -0.0029 | -0.0546 | 97.961  | -3.4516 | -0.0177 | -0.0413 | 97.875  |
| H | -3.3304 | 0.0110  | 1.0209  | 27.780  | -3.1478 | -0.0632 | 1.0040  | 27.727  |
| C | -4.4773 | 1.1020  | -0.4726 | 100.266 | -4.4913 | 1.0829  | -0.2674 | 100.103 |
| H | -4.7411 | 0.9340  | -1.5240 | 28.059  | -4.8842 | 0.9681  | -1.2851 | 28.002  |
| C | -3.8399 | 2.4813  | -0.3586 | 109.531 | -3.8751 | 2.4722  | -0.1511 | 109.314 |
| H | -3.6653 | 2.7011  | 0.6982  | 27.797  | -3.5777 | 2.6380  | 0.8879  | 27.770  |
| C | -2.4996 | 2.5119  | -1.0883 | 103.364 | -2.6358 | 2.5818  | -1.0351 | 103.535 |
| H | -2.6642 | 2.3396  | -2.1596 | 28.429  | -2.9279 | 2.4635  | -2.0862 | 28.417  |
| C | -1.7439 | 3.8236  | -0.9388 | 117.613 | -1.8933 | 3.9027  | -0.9019 | 117.749 |
| H | -0.8268 | 3.7681  | -1.5309 | 27.679  | -1.0622 | 3.9093  | -1.6119 | 27.664  |
| H | -2.3543 | 4.6372  | -1.3232 | 27.802  | -2.5649 | 4.7215  | -1.1480 | 27.802  |
| O | -1.4442 | 4.1439  | 0.4191  | 314.056 | -1.4213 | 4.1439  | 0.4228  | 315.769 |
| H | -0.9481 | 3.4061  | 0.7900  | 30.350  | -0.8695 | 3.3954  | 0.6745  | 30.288  |
| O | -4.0202 | -1.2905 | -0.4517 | 100.114 | -3.9877 | -1.2931 | -0.4516 | 101.268 |
| O | -5.6597 | 1.1346  | 0.3190  | 273.577 | -5.5634 | 1.0366  | 0.6679  | 273.150 |
| H | -5.9987 | 0.2243  | 0.4217  | 25.551  | -5.8730 | 0.1138  | 0.7511  | 25.521  |
| O | -4.6906 | 3.4762  | -0.9278 | 292.064 | -4.8110 | 3.4719  | -0.5542 | 291.757 |
| H | -5.5661 | 3.3558  | -0.5426 | 29.488  | -5.6284 | 3.3086  | -0.0701 | 29.420  |
| C | 4.4146  | 1.6174  | -0.7953 | 164.992 | 4.3738  | 1.7795  | -0.3421 | 165.384 |
| H | 4.3670  | 1.3062  | -1.8393 | 31.140  | 4.3819  | 1.6980  | -1.4296 | 31.107  |
| H | 5.3339  | 2.1859  | -0.6554 | 31.191  | 5.2704  | 2.3196  | -0.0386 | 31.155  |
| H | 3.5856  | 2.3024  | -0.6256 | 30.895  | 3.5208  | 2.3999  | -0.0729 | 30.931  |
| C | 0.6250  | 0.9272  | 2.5808  | 162.786 | 0.4355  | 0.3486  | 2.5914  | 163.512 |
| H | 0.7205  | 1.4436  | 3.5378  | 30.969  | -0.3336 | -0.4147 | 2.4851  | 30.257  |
| H | -0.1561 | 0.1761  | 2.6847  | 30.227  | 0.1227  | 1.2159  | 2.0082  | 31.271  |
| H | 0.2852  | 1.6540  | 1.8415  | 31.336  | 0.4655  | 0.6468  | 3.6413  | 30.969  |
| S | -4.8777 | -2.1973 | 0.6363  | 121.494 | -4.6901 | -2.2838 | 0.6741  | 121.464 |
| O | -4.9194 | -3.4880 | -0.0406 | 115.638 | -3.7954 | -2.2973 | 1.8305  | 110.882 |
| O | -6.1968 | -1.5364 | 0.7314  | 93.256  | -4.7822 | -3.5356 | -0.0677 | 115.396 |
| O | -4.1245 | -2.1641 | 1.8892  | 111.213 | -6.0033 | -1.6681 | 0.9608  | 93.238  |

**Table S6.** Atomic coordinates and NMR shielding tensors for peyssonoside A (1), obtained from DFT calculations at B3LYP/6-311++G(2d,2p) level of theory using DMSO as solvent.

| <i>1'S,2'R,3'S,4'S,5'R,1S,3R,6S,7R,10S,11S,14S-1e</i> |          |          |          |           |   |          |          |          |           |
|-------------------------------------------------------|----------|----------|----------|-----------|---|----------|----------|----------|-----------|
| Atom                                                  | <i>x</i> | <i>y</i> | <i>z</i> | Shielding |   | <i>x</i> | <i>y</i> | <i>z</i> | Shielding |
| C                                                     | 3.0717   | -0.7250  | -0.2851  | 138.344   | H | 8.1295   | 1.6950   | 0.9771   | 30.958    |
| C                                                     | 3.7199   | -1.3754  | -1.5123  | 153.596   | C | -1.2393  | -1.8938  | -2.3810  | 155.583   |
| H                                                     | 3.0822   | -1.3898  | -2.3945  | 30.368    | H | -0.5801  | -2.5155  | -2.9865  | 30.965    |
| H                                                     | 3.9702   | -2.4168  | -1.2950  | 30.353    | H | -1.5367  | -1.0429  | -2.9939  | 30.332    |
| C                                                     | 5.0102   | -0.5976  | -1.7546  | 150.236   | H | -2.1282  | -2.4736  | -2.1357  | 30.649    |
| H                                                     | 5.7386   | -1.1879  | -2.3075  | 29.967    | O | -1.4460  | -0.8130  | -0.1816  | 189.964   |
| H                                                     | 4.8170   | 0.3064   | -2.3388  | 30.516    | C | -2.1041  | 0.3359   | -0.5745  | 82.262    |
| C                                                     | 4.1561   | 0.1996   | 0.3878   | 134.073   | H | -2.1769  | 0.4242   | -1.6627  | 27.083    |
| C                                                     | 5.4871   | -0.2212  | -0.3454  | 115.231   | O | -1.3857  | 1.4713   | -0.0714  | 224.369   |
| H                                                     | 5.8237   | -1.1471  | 0.1378   | 30.601    | C | -3.5145  | 0.3249   | 0.0383   | 97.929    |
| C                                                     | 4.2277   | -0.0491  | 1.9089   | 139.268   | H | -3.4237  | 0.0864   | 1.0976   | 27.778    |
| H                                                     | 4.7876   | -0.9703  | 2.0953   | 30.728    | C | -4.2215  | 1.6675   | -0.1644  | 100.084   |
| H                                                     | 4.7849   | 0.7539   | 2.3907   | 30.112    | H | -4.4453  | 1.7699   | -1.2333  | 27.975    |
| C                                                     | 2.8583   | -0.1833  | 2.5693   | 151.958   | C | -3.3343  | 2.8381   | 0.2436   | 106.042   |
| H                                                     | 2.2570   | 0.7154   | 2.4034   | 30.883    | H | -3.1876  | 2.8041   | 1.3285   | 28.358    |
| H                                                     | 2.9825   | -0.2617  | 3.6518   | 30.648    | C | -1.9732  | 2.7251   | -0.4362  | 102.241   |
| C                                                     | 2.1063   | -1.4213  | 2.0742   | 140.287   | H | -2.0995  | 2.7735   | -1.5245  | 28.205    |
| H                                                     | 2.7017   | -2.2895  | 2.3851   | 30.212    | C | -1.0023  | 3.8091   | -0.0049  | 114.425   |
| C                                                     | 2.0334   | -1.4914  | 0.5447   | 151.002   | H | -1.4272  | 4.7851   | -0.2243  | 27.785    |
| C                                                     | 1.6086   | -0.2933  | -0.2719  | 162.267   | H | -0.8345  | 3.7369   | 1.0740   | 27.990    |
| H                                                     | 1.3902   | 0.6073   | 0.2830   | 31.062    | O | 0.2340   | 3.7321   | -0.7130  | 301.511   |
| C                                                     | 1.4720   | -2.7978  | -0.0159  | 155.376   | H | 0.5896   | 2.8471   | -0.5785  | 29.928    |
| H                                                     | 1.9938   | -3.0796  | -0.9297  | 30.739    | O | -4.2420  | -0.7191  | -0.6403  | 100.833   |
| H                                                     | 1.6502   | -3.6144  | 0.6870   | 30.463    | O | -5.4215  | 1.7854   | 0.5908   | 273.724   |
| C                                                     | -0.0407  | -2.7272  | -0.3139  | 141.375   | H | -5.9384  | 0.9618   | 0.4953   | 25.556    |
| H                                                     | -0.3314  | -3.6251  | -0.8603  | 30.124    | O | -3.9350  | 4.0779   | -0.1270  | 290.597   |
| H                                                     | -0.6019  | -2.7404  | 0.6166   | 29.975    | H | -4.8449  | 4.0600   | 0.1915   | 29.437    |
| C                                                     | -0.5064  | -1.4740  | -1.1049  | 97.799    | C | 3.8449   | 1.6858   | 0.1222   | 164.402   |
| C                                                     | 0.6723   | -0.5434  | -1.4396  | 150.190   | H | 3.7250   | 1.8907   | -0.9419  | 31.199    |
| H                                                     | 0.2859   | 0.3994   | -1.8268  | 29.811    | H | 4.6401   | 2.3270   | 0.5012   | 31.224    |
| H                                                     | 1.2051   | -1.0049  | -2.2708  | 30.994    | H | 2.9266   | 1.9955   | 0.6185   | 30.889    |
| C                                                     | 6.6932   | 0.7484   | -0.3440  | 147.611   | C | 0.7422   | -1.5337  | 2.7691   | 162.526   |
| H                                                     | 6.3771   | 1.6837   | -0.8144  | 30.227    | H | 0.2645   | -2.4949  | 2.5848   | 30.393    |
| C                                                     | 7.8483   | 0.1858   | -1.1910  | 158.712   | H | 0.0616   | -0.7517  | 2.4304   | 30.961    |
| H                                                     | 7.5752   | 0.0647   | -2.2378  | 30.481    | H | 0.8632   | -1.4325  | 3.8495   | 30.972    |
| H                                                     | 8.1698   | -0.7885  | -0.8134  | 31.141    | S | -5.3350  | -1.6347  | 0.2020   | 121.590   |
| H                                                     | 8.7089   | 0.8553   | -1.1505  | 30.940    | O | -5.5934  | -2.7113  | -0.7466  | 115.285   |
| C                                                     | 7.2300   | 1.0820   | 1.0556   | 160.024   | O | -6.4957  | -0.7446  | 0.4180   | 93.760    |
| H                                                     | 7.4970   | 0.1723   | 1.5986   | 31.255    | O | -4.6737  | -2.0306  | 1.4442   | 111.383   |
| H                                                     | 6.5141   | 1.6325   | 1.6615   | 30.370    |   |          |          |          |           |

**Table S7.** Atomic coordinates for peyssonoside A (**1**), obtained from DFT calculations at B3LYP/6-311++G(2d,2p) level of theory using DMSO as solvent.

| <i>1'S,2'R,3'S,4'S,5'R,1R,3S,6R,7S,10R,11R,14R -1a</i> |         |         |         |           | <i>1'S,2'R,3'S,4'S,5'R,1R,3S,6R,7S,10R,11R,14R -1b</i> |         |         |           |
|--------------------------------------------------------|---------|---------|---------|-----------|--------------------------------------------------------|---------|---------|-----------|
| Atom                                                   | x       | y       | z       | Shielding | x                                                      | y       | z       | Shielding |
| C                                                      | 0.2323  | -2.0075 | 0.6727  | 141.536   | -1.8638                                                | 1.0132  | -0.1255 | 142.806   |
| C                                                      | 1.0061  | -2.8747 | 1.7344  | 133.514   | -2.7374                                                | 2.1118  | 0.5742  | 132.779   |
| C                                                      | 2.4625  | -2.3869 | 1.8749  | 139.858   | -2.6734                                                | 1.9946  | 2.1088  | 141.675   |
| H                                                      | 2.9245  | -2.8389 | 2.7522  | 30.180    | -3.1155                                                | 2.8843  | 2.5641  | 30.219    |
| H                                                      | 3.0386  | -2.7287 | 1.0099  | 30.873    | -3.2837                                                | 1.1450  | 2.4291  | 30.980    |
| C                                                      | 2.5833  | -0.8693 | 1.9634  | 152.842   | -1.2555                                                | 1.7857  | 2.6285  | 152.815   |
| H                                                      | 2.0017  | -0.4886 | 2.8078  | 30.927    | -0.6066                                                | 2.6073  | 2.3121  | 30.930    |
| H                                                      | 3.6199  | -0.5933 | 2.1699  | 30.510    | -1.2508                                                | 1.8074  | 3.7205  | 30.480    |
| C                                                      | 2.1429  | -0.1771 | 0.6696  | 143.727   | -0.6678                                                | 0.4459  | 2.1659  | 143.077   |
| H                                                      | 2.8867  | -0.4392 | -0.0936 | 30.420    | -1.2358                                                | -0.3383 | 2.6822  | 30.392    |
| C                                                      | 0.7934  | -0.6871 | 0.1419  | 153.885   | -0.8496                                                | 0.1826  | 0.6613  | 153.534   |
| C                                                      | -0.3984 | -0.6732 | 1.0663  | 164.611   | -0.3637                                                | 1.2212  | -0.3193 | 165.036   |
| H                                                      | -0.1856 | -0.3546 | 2.0771  | 31.320    | 0.0275                                                 | 2.1238  | 0.1294  | 31.378    |
| C                                                      | 0.5628  | -0.3166 | -1.3239 | 157.613   | -0.6493                                                | -1.2889 | 0.2973  | 157.692   |
| H                                                      | 1.0560  | -1.0491 | -1.9701 | 30.390    | -1.5747                                                | -1.8422 | 0.4837  | 30.411    |
| H                                                      | 1.0680  | 0.6311  | -1.4990 | 29.575    | 0.0909                                                 | -1.6940 | 0.9843  | 29.516    |
| C                                                      | -0.8969 | -0.1522 | -1.7814 | 148.613   | -0.1669                                                | -1.5926 | -1.1313 | 148.624   |
| H                                                      | -1.3380 | -1.1193 | -2.0206 | 30.926    | -1.0021                                                | -1.5816 | -1.8309 | 30.870    |
| H                                                      | -0.9157 | 0.4212  | -2.7100 | 30.279    | 0.2355                                                 | -2.6067 | -1.1628 | 30.275    |
| C                                                      | -1.8160 | 0.5158  | -0.7528 | 100.494   | 0.8802                                                 | -0.6123 | -1.6715 | 100.321   |
| C                                                      | -1.7784 | -0.2449 | 0.5833  | 147.077   | 0.3567                                                 | 0.8323  | -1.6040 | 146.910   |
| H                                                      | -2.2387 | 0.3968  | 1.3345  | 29.770    | 1.2111                                                 | 1.4931  | -1.7508 | 29.762    |
| H                                                      | -2.4324 | -1.1134 | 0.4866  | 30.545    | -0.2961                                                | 0.9876  | -2.4649 | 30.496    |
| C                                                      | 0.2992  | -2.8208 | 3.1027  | 165.597   | -2.2969                                                | 3.5248  | 0.1497  | 163.739   |
| H                                                      | -0.7431 | -3.1330 | 3.0294  | 31.119    | -2.2856                                                | 3.6395  | -0.9341 | 31.079    |
| H                                                      | 0.3048  | -1.8138 | 3.5164  | 30.866    | -1.2930                                                | 3.7516  | 0.5064  | 30.828    |
| H                                                      | 0.7938  | -3.4671 | 3.8274  | 31.286    | -2.9622                                                | 4.2811  | 0.5667  | 31.351    |
| C                                                      | 2.1777  | 1.3464  | 0.8536  | 163.705   | 0.7957                                                 | 0.3376  | 2.6165  | 163.676   |
| H                                                      | 1.9285  | 1.8843  | -0.0592 | 30.084    | 1.4011                                                 | 1.1121  | 2.1415  | 31.269    |
| H                                                      | 3.1723  | 1.6670  | 1.1705  | 30.975    | 0.8705                                                 | 0.4733  | 3.6974  | 30.943    |
| H                                                      | 1.4680  | 1.6557  | 1.6233  | 31.312    | 1.2398                                                 | -0.6249 | 2.3697  | 30.099    |
| C                                                      | -3.2594 | 0.5797  | -1.2588 | 156.472   | 1.2587                                                 | -0.9464 | -3.1165 | 156.393   |
| H                                                      | -3.3431 | 1.0903  | -2.2174 | 30.269    | 0.3836                                                 | -0.8435 | -3.7568 | 30.953    |
| H                                                      | -3.8939 | 1.0930  | -0.5370 | 30.757    | 1.6200                                                 | -1.9680 | -3.2278 | 30.244    |
| H                                                      | -3.6428 | -0.4303 | -1.3982 | 30.975    | 2.0303                                                 | -0.2658 | -3.4751 | 30.747    |
| O                                                      | -1.3401 | 1.8613  | -0.4059 | 203.356   | 2.0800                                                 | -0.5920 | -0.8246 | 203.594   |
| C                                                      | -1.3273 | 2.8537  | -1.3672 | 81.873    | 2.8688                                                 | -1.7218 | -0.7229 | 81.894    |
| H                                                      | -2.0448 | 2.6631  | -2.1704 | 27.027    | 2.7580                                                 | -2.3850 | -1.5855 | 27.020    |
| O                                                      | -0.0151 | 2.9290  | -1.9388 | 223.962   | 2.4937                                                 | -2.4437 | 0.4569  | 224.106   |
| C                                                      | 0.1009  | 3.9079  | -2.9762 | 101.996   | 3.2313                                                 | -3.6555 | 0.6444  | 102.098   |
| H                                                      | -0.6630 | 3.7300  | -3.7427 | 28.256    | 3.1525                                                 | -4.2815 | -0.2528 | 28.261    |
| C                                                      | -0.1000 | 5.2901  | -2.3622 | 105.546   | 4.6934                                                 | -3.2987 | 0.8949  | 105.478   |
| H                                                      | 0.6845  | 5.4589  | -1.6167 | 28.334    | 4.7544                                                 | -2.6939 | 1.8061  | 28.333    |
| C                                                      | -1.4545 | 5.3637  | -1.6660 | 99.914    | 5.2412                                                 | -2.4795 | -0.2685 | 99.973    |
| H                                                      | -2.2340 | 5.2970  | -2.4349 | 28.002    | 5.2725                                                 | -3.1277 | -1.1529 | 27.998    |
| C                                                      | -1.6556 | 4.1970  | -0.6950 | 97.924    | 4.3383                                                 | -1.2871 | -0.5958 | 97.901    |
| H                                                      | -1.0217 | 4.3049  | 0.1849  | 27.729    | 4.4035                                                 | -0.5214 | 0.1768  | 27.731    |
| C                                                      | 1.4752  | 3.7274  | -3.5959 | 114.396   | 2.5893                                                 | -4.3820 | 1.8127  | 114.395   |
| H                                                      | 1.6218  | 4.4673  | -4.3783 | 27.789    | 2.6407                                                 | -3.7495 | 2.7041  | 28.005    |
| H                                                      | 2.2405  | 3.8761  | -2.8281 | 28.002    | 3.1309                                                 | -5.3033 | 2.0105  | 27.780    |
| O                                                      | 1.6203  | 2.4472  | -4.2089 | 302.456   | 1.2391                                                 | -4.7508 | 1.5355  | 302.452   |
| H                                                      | 1.4346  | 1.7824  | -3.5367 | 29.996    | 0.7621                                                 | -3.9468 | 1.3023  | 29.985    |
| O                                                      | -0.0095 | 6.2719  | -3.3933 | 291.138   | 5.4414                                                 | -4.5023 | 1.0598  | 291.017   |
| H                                                      | -0.2783 | 7.1143  | -3.0087 | 29.523    | 6.3741                                                 | -4.2580 | 1.0769  | 29.541    |
| O                                                      | -1.5143 | 6.6355  | -1.0311 | 274.103   | 6.5630                                                 | -2.0964 | 0.0926  | 274.166   |



|   |         |         |         |         |         |         |         |         |
|---|---------|---------|---------|---------|---------|---------|---------|---------|
| H | -2.2814 | 6.6527  | -0.4261 | 25.523  | 6.8786  | -1.4158 | -0.5333 | 25.517  |
| O | -3.0403 | 4.1246  | -0.2975 | 99.796  | 4.7095  | -0.7300 | -1.8735 | 99.842  |
| S | -3.5226 | 4.8435  | 1.1140  | 121.687 | 5.7345  | 0.5694  | -1.9296 | 121.687 |
| O | -3.5162 | 6.2942  | 0.8288  | 93.386  | 7.0660  | 0.0240  | -1.5900 | 93.575  |
| O | -2.5483 | 4.4525  | 2.1314  | 112.217 | 5.2383  | 1.5307  | -0.9463 | 112.279 |
| O | -4.8603 | 4.2858  | 1.2733  | 115.670 | 5.6063  | 0.9709  | -3.3253 | 115.639 |
| C | 0.9312  | -4.3290 | 1.1299  | 115.452 | -4.1784 | 1.7721  | 0.0619  | 116.858 |
| H | 1.7152  | -4.3840 | 0.3642  | 30.773  | -4.4705 | 0.8887  | 0.6398  | 30.464  |
| C | -0.4151 | -4.3404 | 0.3945  | 149.821 | -3.9531 | 1.2747  | -1.3676 | 156.781 |
| H | -1.2308 | -4.4663 | 1.1122  | 30.412  | -3.7333 | 2.1052  | -2.0403 | 30.282  |
| H | -0.4976 | -5.1486 | -0.3297 | 29.967  | -4.8141 | 0.7454  | -1.7776 | 30.254  |
| C | -0.4906 | -2.9704 | -0.2748 | 154.579 | -2.7261 | 0.3686  | -1.2234 | 154.584 |
| H | -1.5201 | -2.6834 | -0.4814 | 30.455  | -2.2013 | 0.2505  | -2.1699 | 30.354  |
| H | 0.0223  | -3.0099 | -1.2391 | 30.380  | -3.0477 | -0.6294 | -0.9158 | 30.393  |
| C | 1.1303  | -5.5474 | 2.0634  | 147.018 | -5.3049 | 2.8152  | 0.2851  | 151.303 |
| H | 0.3695  | -5.5004 | 2.8477  | 30.205  | -5.0580 | 3.3751  | 1.1920  | 30.027  |
| C | 2.5061  | -5.5985 | 2.7437  | 160.532 | -6.6437 | 2.1077  | 0.5513  | 157.251 |
| H | 2.6095  | -6.5222 | 3.3157  | 30.924  | -7.4402 | 2.8315  | 0.7341  | 30.836  |
| H | 2.6670  | -4.7713 | 3.4312  | 30.357  | -6.5802 | 1.4517  | 1.4206  | 30.853  |
| H | 3.3086  | -5.5776 | 2.0025  | 31.111  | -6.9423 | 1.4987  | -0.3053 | 30.767  |
| C | 0.9113  | -6.8650 | 1.2994  | 158.573 | -5.4886 | 3.8334  | -0.8511 | 162.601 |
| H | 1.0917  | -7.7182 | 1.9553  | 30.931  | -6.2400 | 4.5734  | -0.5695 | 30.949  |
| H | 1.6018  | -6.9453 | 0.4555  | 31.189  | -5.8378 | 3.3463  | -1.7634 | 31.248  |
| H | -0.1018 | -6.9560 | 0.9114  | 30.493  | -4.5723 | 4.3686  | -1.0911 | 30.652  |

**Table S8.** Atomic coordinates for peyssonoside A (**1**), obtained from DFT calculations at B3LYP/6-311++G(2d,2p) level of theory using DMSO as solvent.

| <i>1'S,2'R,3'S,4'S,5'R,1R,3S,6R,7S,10R,11R,14R-1c</i> |         |         |         |           | <i>1'S,2'R,3'S,4'S,5'R,1R,3S,6R,7S,10R,11R,14R-1d</i> |         |         |           |  |
|-------------------------------------------------------|---------|---------|---------|-----------|-------------------------------------------------------|---------|---------|-----------|--|
| Atom                                                  | x       | y       | z       | Shielding | x                                                     | y       | z       | Shielding |  |
| C                                                     | 3.1835  | -0.0550 | -0.1654 | 143.411   | -3.1349                                               | -0.1188 | 0.2522  | 141.836   |  |
| C                                                     | 4.4723  | -0.1910 | 0.7167  | 132.670   | -4.4111                                               | -0.2826 | -0.6526 | 133.079   |  |
| C                                                     | 4.4670  | 0.8106  | 1.8874  | 141.463   | -4.3858                                               | 0.7293  | -1.8170 | 139.505   |  |
| H                                                     | 5.2593  | 0.5538  | 2.5948  | 30.211    | -5.1394                                               | 0.4652  | -2.5582 | 30.132    |  |
| H                                                     | 4.7015  | 1.8089  | 1.5061  | 30.971    | -4.6579                                               | 1.7183  | -1.4364 | 30.835    |  |
| C                                                     | 3.1224  | 0.8774  | 2.6037  | 152.918   | -3.0239                                               | 0.8331  | -2.4960 | 152.851   |  |
| H                                                     | 2.8432  | -0.1084 | 2.9862  | 30.950    | -2.7126                                               | -0.1438 | -2.8772 | 30.930    |  |
| H                                                     | 3.1985  | 1.5251  | 3.4801  | 30.506    | -3.0982                                               | 1.4819  | -3.3717 | 30.531    |  |
| C                                                     | 2.0128  | 1.4194  | 1.6925  | 143.555   | -1.9490                                               | 1.3963  | -1.5607 | 143.801   |  |
| H                                                     | 2.2463  | 2.4761  | 1.5110  | 30.426    | -2.2140                                               | 2.4448  | -1.3738 | 30.398    |  |
| C                                                     | 1.9725  | 0.7482  | 0.3093  | 153.576   | -1.9269                                               | 0.7105  | -0.1866 | 154.192   |  |
| C                                                     | 1.8895  | -0.7564 | 0.2396  | 165.154   | -1.8193                                               | -0.7929 | -0.1317 | 164.576   |  |
| H                                                     | 1.9311  | -1.2603 | 1.1954  | 31.403    | -1.8299                                               | -1.2846 | -1.0944 | 31.323    |  |
| C                                                     | 1.1672  | 1.5541  | -0.7102 | 158.382   | -1.1591                                               | 1.5189  | 0.8606  | 158.660   |  |
| H                                                     | 1.8011  | 2.3346  | -1.1424 | 30.502    | -1.8202                                               | 2.2739  | 1.2974  | 30.515    |  |
| H                                                     | 0.3751  | 2.0705  | -0.1739 | 29.504    | -0.3736                                               | 2.0664  | 0.3451  | 29.397    |  |
| C                                                     | 0.5056  | 0.7647  | -1.8531 | 148.781   | -0.4912                                               | 0.7273  | 1.9983  | 148.326   |  |
| H                                                     | 1.2214  | 0.5670  | -2.6506 | 30.934    | -1.2100                                               | 0.5014  | 2.7857  | 31.000    |  |
| H                                                     | -0.2783 | 1.3795  | -2.2988 | 30.277    | 0.2762                                                | 1.3512  | 2.4590  | 30.267    |  |
| C                                                     | -0.0811 | -0.5898 | -1.4393 | 99.856    | 0.1276                                                | -0.6078 | 1.5678  | 100.569   |  |
| C                                                     | 0.9922  | -1.4628 | -0.7673 | 146.947   | -0.9284                                               | -1.4936 | 0.8852  | 146.844   |  |
| H                                                     | 0.4778  | -2.2873 | -0.2735 | 29.797    | -0.4005                                               | -2.3125 | 0.3965  | 29.793    |  |
| H                                                     | 1.5937  | -1.9139 | -1.5587 | 30.538    | -1.5342                                               | -1.9503 | 1.6701  | 30.624    |  |
| C                                                     | 4.6189  | -1.6213 | 1.2680  | 163.623   | -4.5052                                               | -1.7181 | -1.2060 | 165.447   |  |
| H                                                     | 4.5824  | -2.3690 | 0.4758  | 31.077    | -4.4907                                               | -2.4591 | -0.4061 | 31.116    |  |
| H                                                     | 3.8213  | -1.8594 | 1.9705  | 30.840    | -3.6731                                               | -1.9454 | -1.8703 | 30.894    |  |
| H                                                     | 5.5612  | -1.7369 | 1.8039  | 31.320    | -5.4207                                               | -1.8608 | -1.7796 | 31.247    |  |
| C                                                     | 0.6635  | 1.3567  | 2.4221  | 163.701   | -0.5834                                               | 1.3766  | -2.2613 | 163.603   |  |
| H                                                     | 0.7209  | 1.8921  | 3.3722  | 31.004    | -0.2848                                               | 0.3516  | -2.4890 | 31.315    |  |

|   |         |         |         |         |         |         |         |         |
|---|---------|---------|---------|---------|---------|---------|---------|---------|
| H | -0.1467 | 1.7930  | 1.8409  | 30.177  | -0.6339 | 1.9251  | -3.2043 | 30.998  |
| H | 0.3941  | 0.3214  | 2.6400  | 31.325  | 0.2031  | 1.8232  | -1.6561 | 30.028  |
| C | -0.6586 | -1.3355 | -2.6449 | 156.176 | 0.7202  | -1.3550 | 2.7650  | 156.650 |
| H | 0.1367  | -1.5518 | -3.3571 | 30.933  | -0.0734 | -1.6078 | 3.4670  | 30.967  |
| H | -1.4135 | -0.7541 | -3.1729 | 30.250  | 1.4517  | -0.7587 | 3.3092  | 30.250  |
| H | -1.1061 | -2.2780 | -2.3309 | 30.772  | 1.1990  | -2.2782 | 2.4396  | 30.818  |
| O | -1.1096 | -0.4355 | -0.4016 | 203.473 | 1.1475  | -0.4171 | 0.5294  | 203.131 |
| C | -2.2742 | 0.2491  | -0.6892 | 81.855  | 2.3182  | 0.2549  | 0.8257  | 81.834  |
| H | -2.5008 | 0.2516  | -1.7595 | 27.035  | 2.5845  | 0.1750  | 1.8843  | 27.026  |
| O | -2.1288 | 1.6069  | -0.2545 | 227.629 | 2.1563  | 1.6392  | 0.5014  | 222.380 |
| C | -3.2675 | 2.4163  | -0.5407 | 106.464 | 3.3093  | 2.4266  | 0.8029  | 103.461 |
| H | -3.5195 | 2.3578  | -1.6068 | 28.306  | 3.6054  | 2.2684  | 1.8485  | 28.574  |
| C | -4.4366 | 1.8946  | 0.2933  | 98.914  | 4.4434  | 1.9764  | -0.1134 | 108.587 |
| H | -4.1682 | 1.9822  | 1.3508  | 28.032  | 4.1309  | 2.1260  | -1.1514 | 27.894  |
| C | -4.7129 | 0.4309  | -0.0224 | 100.679 | 4.7286  | 0.4938  | 0.0901  | 100.045 |
| H | -5.0774 | 0.3671  | -1.0548 | 27.995  | 5.1248  | 0.3568  | 1.1037  | 27.999  |
| C | -3.4346 | -0.4077 | 0.0776  | 97.881  | 3.4492  | -0.3386 | -0.0311 | 97.582  |
| H | -3.1306 | -0.5330 | 1.1166  | 27.791  | 3.1081  | -0.3818 | -1.0650 | 27.748  |
| C | -2.8879 | 3.8578  | -0.2083 | 111.396 | 2.9485  | 3.9001  | 0.6656  | 116.401 |
| H | -1.9574 | 4.1023  | -0.7171 | 27.947  | 3.7558  | 4.4990  | 1.0888  | 27.465  |
| H | -2.7220 | 3.9525  | 0.8696  | 27.763  | 2.0458  | 4.0856  | 1.2452  | 28.012  |
| O | -3.8653 | 4.7931  | -0.6586 | 301.623 | 2.6604  | 4.3142  | -0.6704 | 313.661 |
| H | -4.7266 | 4.4738  | -0.3556 | 28.721  | 3.4910  | 4.4538  | -1.1350 | 30.650  |
| O | -5.5902 | 2.6996  | 0.0237  | 290.017 | 5.6014  | 2.7633  | 0.1636  | 293.431 |
| H | -6.3216 | 2.3532  | 0.5473  | 29.185  | 6.3330  | 2.3794  | -0.3336 | 29.504  |
| O | -5.7306 | 0.0049  | 0.8753  | 274.736 | 5.7207  | 0.1350  | -0.8652 | 273.982 |
| H | -5.7995 | -0.9689 | 0.8350  | 25.538  | 5.7906  | -0.8389 | -0.8995 | 25.488  |
| O | -3.6460 | -1.6976 | -0.5321 | 100.187 | 3.6818  | -1.6737 | 0.4648  | 99.753  |
| S | -4.0774 | -2.9860 | 0.4145  | 121.742 | 4.0765  | -2.8792 | -0.5992 | 121.393 |
| O | -3.1675 | -2.9815 | 1.5587  | 112.231 | 3.1369  | -2.7721 | -1.7144 | 112.044 |
| O | -3.9107 | -4.0921 | -0.5205 | 115.749 | 3.9257  | -4.0610 | 0.2414  | 115.849 |
| O | -5.4852 | -2.7348 | 0.7898  | 93.448  | 5.4763  | -2.6052 | -0.9891 | 93.683  |
| C | 5.6129  | 0.1621  | -0.2979 | 116.731 | -5.5957 | 0.0031  | 0.3475  | 115.037 |
| H | 5.5570  | 1.2510  | -0.4014 | 30.507  | -5.6650 | 1.0947  | 0.4362  | 30.783  |
| C | 5.1112  | -0.4070 | -1.6269 | 156.779 | -5.0639 | -0.5219 | 1.6875  | 150.136 |
| H | 5.2069  | -1.4938 | -1.6461 | 30.294  | -5.1376 | -1.6126 | 1.7168  | 30.426  |
| H | 5.6528  | -0.0194 | -2.4906 | 30.268  | -5.6166 | -0.1400 | 2.5439  | 29.957  |
| C | 3.6337  | -0.0020 | -1.6347 | 154.877 | -3.6033 | -0.0768 | 1.7104  | 154.672 |
| H | 3.0451  | -0.6424 | -2.2896 | 30.388  | -3.0051 | -0.6965 | 2.3762  | 30.495  |
| H | 3.5398  | 1.0150  | -2.0230 | 30.417  | -3.5448 | 0.9435  | 2.0984  | 30.315  |
| C | 7.0791  | -0.1508 | 0.1016  | 151.115 | -7.0157 | -0.5095 | 0.0046  | 147.300 |
| H | 7.1438  | -0.0835 | 1.1916  | 30.039  | -6.9665 | -1.5972 | -0.0989 | 30.194  |
| C | 8.0274  | 0.9180  | -0.4660 | 157.274 | -7.5926 | 0.0630  | -1.2981 | 160.346 |
| H | 9.0604  | 0.7212  | -0.1732 | 30.820  | -8.6244 | -0.2675 | -1.4301 | 30.968  |
| H | 7.7615  | 1.9143  | -0.1098 | 30.875  | -7.0366 | -0.2503 | -2.1787 | 30.367  |
| H | 7.9918  | 0.9337  | -1.5580 | 30.775  | -7.5961 | 1.1554  | -1.2765 | 31.169  |
| C | 7.5838  | -1.5433 | -0.3073 | 162.699 | -7.9976 | -0.2086 | 1.1504  | 158.583 |
| H | 8.5900  | -1.7049 | 0.0837  | 30.943  | -9.0025 | -0.5424 | 0.8868  | 30.922  |
| H | 7.6373  | -1.6385 | -1.3934 | 31.234  | -8.0477 | 0.8655  | 1.3482  | 31.204  |
| H | 6.9520  | -2.3469 | 0.0649  | 30.650  | -7.7180 | -0.7061 | 2.0775  | 30.499  |

**Table S9.** Atomic coordinates for peyssonnoside A (**1**), obtained from DFT calculations at B3LYP/6-311++G(2d,2p) level of theory using DMSO as solvent.

| 1'S,2'R,3'S,4'S,5'R,1R,3S,6R,7S,10R,11R,14R -1e |         |         |         |           |   |         |         |         |           |
|-------------------------------------------------|---------|---------|---------|-----------|---|---------|---------|---------|-----------|
| Atom                                            | x       | y       | z       | Shielding |   | x       | y       | z       | Shielding |
| C                                               | -3.1796 | -0.0887 | 0.2323  | 141.734   | H | 3.5301  | 2.3814  | 1.5761  | 28.295    |
| C                                               | -4.4797 | -0.2647 | -0.6366 | 133.124   | C | 4.4179  | 1.9068  | -0.3348 | 98.957    |
| C                                               | -4.4718 | 0.7141  | -1.8288 | 139.654   | H | 4.1324  | 1.9858  | -1.3886 | 28.031    |
| H                                               | -5.2515 | 0.4428  | -2.5401 | 30.180    | C | 4.7061  | 0.4463  | -0.0146 | 100.648   |
| H                                               | -4.7159 | 1.7178  | -1.4683 | 30.866    | H | 5.0870  | 0.3898  | 1.0123  | 27.993    |
| C                                               | -3.1287 | 0.7750  | -2.5489 | 152.894   | C | 3.4299  | -0.3983 | -0.0904 | 97.924    |
| H                                               | -2.8435 | -0.2177 | -2.9090 | 30.941    | H | 3.1076  | -0.5262 | -1.1235 | 27.778    |
| H                                               | -3.2171 | 1.3988  | -3.4413 | 30.540    | C | 2.8666  | 3.8655  | 0.1751  | 111.383   |
| C                                               | -2.0195 | 1.3484  | -1.6610 | 143.863   | H | 2.6823  | 3.9494  | -0.9007 | 27.762    |
| H                                               | -2.2609 | 2.4073  | -1.5034 | 30.436    | H | 1.9432  | 4.1094  | 0.6971  | 27.948    |
| C                                               | -1.9734 | 0.7101  | -0.2645 | 153.821   | O | 3.8461  | 4.8101  | 0.6007  | 301.579   |
| C                                               | -1.8812 | -0.7917 | -0.1587 | 164.985   | H | 4.7040  | 4.4926  | 0.2868  | 28.726    |
| H                                               | -1.9201 | -1.3171 | -1.1027 | 31.367    | O | 5.5719  | 2.7188  | -0.0891 | 290.022   |
| C                                               | -1.1716 | 1.5462  | 0.7338  | 158.176   | H | 6.2971  | 2.3702  | -0.6199 | 29.168    |
| H                                               | -1.8122 | 2.3263  | 1.1566  | 30.492    | O | 5.7118  | 0.0209  | -0.9260 | 274.747   |
| H                                               | -0.3927 | 2.0638  | 0.1794  | 29.570    | H | 5.7943  | -0.9513 | -0.8741 | 25.526    |
| C                                               | -0.4862 | 0.7902  | 1.8855  | 148.593   | O | 3.6564  | -1.6869 | 0.5162  | 99.986    |
| H                                               | -1.1867 | 0.6096  | 2.7006  | 30.997    | S | 4.0897  | -2.9715 | -0.4352 | 121.746   |
| H                                               | 0.3011  | 1.4212  | 2.3016  | 30.273    | O | 3.9191  | -4.0822 | 0.4936  | 115.834   |
| C                                               | 0.1027  | -0.5708 | 1.4973  | 100.235   | O | 5.4992  | -2.7198 | -0.8041 | 93.071    |
| C                                               | -0.9748 | -1.4660 | 0.8627  | 146.984   | O | 3.1840  | -2.9601 | -1.5827 | 112.035   |
| H                                               | -0.4638 | -2.3054 | 0.3910  | 29.821    | C | -5.6370 | 0.0622  | 0.3833  | 115.215   |
| H                                               | -1.5685 | -1.8921 | 1.6736  | 30.579    | H | -5.6976 | 1.1565  | 0.4384  | 30.794    |
| C                                               | -4.6028 | -1.7137 | -1.1469 | 165.503   | C | -5.0757 | -0.4233 | 1.7260  | 149.948   |
| H                                               | -4.5785 | -2.4321 | -0.3269 | 31.119    | H | -5.1581 | -1.5119 | 1.7929  | 30.414    |
| H                                               | -3.7887 | -1.9699 | -1.8230 | 30.883    | H | -5.6034 | -0.0085 | 2.5828  | 29.990    |
| H                                               | -5.5326 | -1.8609 | -1.6956 | 31.268    | C | -3.6115 | 0.0078  | 1.6991  | 154.675   |
| C                                               | -0.6732 | 1.2794  | -2.3950 | 163.696   | H | -3.0040 | -0.5969 | 2.3703  | 30.489    |
| H                                               | 0.1374  | 1.7290  | -1.8247 | 30.179    | H | -3.5316 | 1.0398  | 2.0501  | 30.420    |
| H                                               | -0.7375 | 1.7984  | -3.3538 | 31.031    | C | -7.0680 | -0.4518 | 0.0926  | 147.319   |
| H                                               | -0.3999 | 0.2419  | -2.5970 | 31.368    | H | -7.0259 | -1.5416 | 0.0107  | 30.191    |
| C                                               | 0.7003  | -1.2829 | 2.7135  | 156.441   | C | -7.6785 | 0.0956  | -1.2055 | 160.532   |
| H                                               | 1.4609  | -0.6854 | 3.2146  | 30.270    | H | -8.7139 | -0.2351 | -1.3041 | 30.940    |
| H                                               | 1.1454  | -2.2329 | 2.4188  | 30.795    | H | -7.1459 | -0.2360 | -2.0939 | 30.374    |
| H                                               | -0.0840 | -1.4820 | 3.4427  | 30.976    | H | -7.6794 | 1.1882  | -1.2054 | 31.128    |
| O                                               | 1.1160  | -0.4368 | 0.4419  | 203.298   | C | -8.0165 | -0.1222 | 1.2585  | 158.607   |
| C                                               | 2.2825  | 0.2572  | 0.6971  | 81.857    | H | -9.0301 | -0.4546 | 1.0287  | 30.928    |
| H                                               | 2.5329  | 0.2704  | 1.7620  | 27.031    | H | -8.0548 | 0.9559  | 1.4365  | 31.213    |
| O                                               | 2.1212  | 1.6108  | 0.2540  | 227.576   | H | -7.7145 | -0.6032 | 2.1873  | 30.507    |
| C                                               | 3.2599  | 2.4290  | 0.5140  | 106.405   |   |         |         |         |           |

### VCD spectra of peyssonnoside A (1)

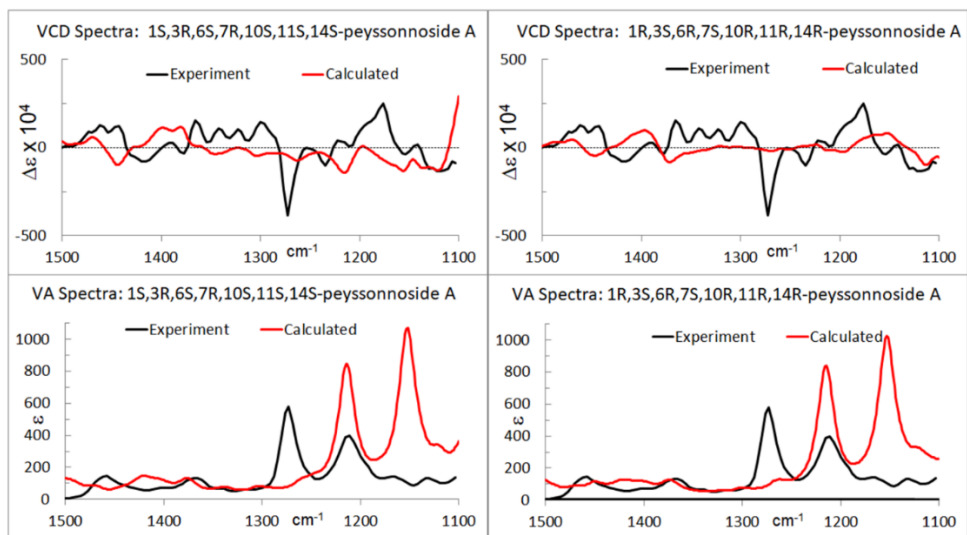

**Figure S13.** Comparison of experimental and calculated vibrational absorption (VA) and vibrational circular dichroism (VCD) spectra of 1'S,2'R,3'S,4'S,5'R,1S,3R,6S,7R,10S,11S,14S-peyssonnoside A (1) and 1'S,2'R,3'S,4'S,5'R,1R,3S,6R,7S,10R,11R,14R-peyssonnoside A (1) with experimental spectra.

**Table S10.** <sup>1</sup>H, <sup>13</sup>C, COSY, HMBC, ROESY NMR correlations for peyssonoside B (2).

| No   | δC                      | δH (mult, J Hz)            | COSY                  | HMBC                                 | ROESY                                        |
|------|-------------------------|----------------------------|-----------------------|--------------------------------------|----------------------------------------------|
| 1    | 13.9 (CH)               | 0.66 dd (9.6, 2.2)         | H-2a, H-2b            | C-3, C-5, C-6, C-7, C-10, C-11, C-12 | H-2b, H-19, H-6'a                            |
| 2a   | 30.5 (CH <sub>2</sub> ) | 0.81 dd (14.8, 2.2)        | H-1                   | C-1, C-4, C-11                       | H-2b, H-12, H-20                             |
| 2b   |                         | 2.39 ddd (14.6, 9.3, 1.7)  | H-1, H-4b             | C-1, C-3, C-4, C-11, C-20            | H-1, H-2a, H-20, H-1', H-5' H-6'b            |
| 3    | 73.0 (C)                |                            |                       |                                      |                                              |
| 4a   | 34.2 (CH <sub>2</sub> ) | 0.75 m                     | H-5a, H-5b            | C-1, C-5 C-20, C-1'                  | H-4b, H-12                                   |
| 4b   |                         | 1.38 m                     | H-2b, H-5b            | C-2, C-3, C-6                        | H-4a, H-5a, H-5b, H-20, H-1'', H-5'', H-6''b |
| 5a   | 21.6 (CH <sub>2</sub> ) | 1.25 m                     | H-4a                  | C-1, C-3, C-4, C-6                   | H-4b, H-5b                                   |
| 5b   |                         | 1.86 ddd (13.7, 12.9, 7.7) | H-4a, H-4b            | C-4, C-6, C-7, C-11                  | H-4a, H-4b, H-5a, H-7, H-19, H-1''           |
| 6    | 23.9 (C)                |                            |                       |                                      |                                              |
| 7    | 34.9 (CH)               | 1.39 m                     | H-8a, H-19            | C-1, C-5, C-8, C-9, C-19             | H-5b, H-8a, H-8b, H-9a, H-19                 |
| 8a   | 26.6 (CH <sub>2</sub> ) | 0.75 m                     | H-7, H-9a, H-9b       | C-7, C-9, C-10                       | H-7, H-8b, H-9b, H-18, H-19                  |
| 8b   |                         | 1.18 m                     | H-9a, H-9b            | C-6, C-7, C-10                       | H-7, H-8a, H-9b                              |
| 9a   | 39.1 (CH <sub>2</sub> ) | 0.91 m                     | H-8a, H-8b            | C-7, C-8, C-10, C-18                 | H-7, H-9b, H-14                              |
| 9b   |                         | 1.49 m                     | H-8a, H-8b            | C-7, C-8, C-10, C-11, C-15, C-18     | H-8a, H-8b, H-9a, H-18                       |
| 10   | 41.5 (C)                |                            |                       |                                      |                                              |
| 11   | 36.3 (C)                |                            |                       |                                      |                                              |
| 12   | 24.9 (CH <sub>2</sub> ) | 1.28 m                     | H-13b                 | C-1, C-6, C-10, C-11, C-13, C-14     | H-2a, H-4a, H-13b                            |
| 13a  | 27.9 (CH <sub>2</sub> ) | 1.20 m                     |                       | C-14                                 | H-13b, H-18                                  |
| 13b  |                         | 1.72 m                     | H-12, H-14            | C-10, C-11, C-12, C-14               | H-12, H-13a, H-17                            |
| 14   | 61.5 (CH)               | 1.19 m                     | H-13b, H-15           | C-9, C-13 C-18                       | H-9a, H-15                                   |
| 15   | 28.5 (CH)               | 1.56 o (6.7)               | H-14, H-16, H-17      | C-10, C-13, C-14, C-16, C-17         | H-14, H-16, H-17, H-18                       |
| 16   | 23.3 (CH <sub>3</sub> ) | 0.91 d (6.6)               | H-15                  | C-14, C-15, C-17                     | H-15                                         |
| 17   | 23.0 (CH <sub>3</sub> ) | 0.88 d (6.6)               | H-15                  | C-14, C-15, C-16                     | H-13b, H-15                                  |
| 18   | 19.0 (CH <sub>3</sub> ) | 0.65 s                     |                       | C-1, C-9, C-10, C-11, C-14, C-15     | H-8a, H-9b, H-13a, H-15                      |
| 19   | 19.5 (CH <sub>3</sub> ) | 1.02 d (6.3)               | H-7                   | C-6, C-7, C-8, C-9                   | H-1, H-5b, H-7, H-8a, H-2', H-6'a, H-1''     |
| 20   | 24.5 (CH <sub>3</sub> ) | 1.13 s                     |                       | C-1, C-2, C-3, C-4, C-5, C-1'        | H-2a, H-2b, H-4b, H-1', H-6''b               |
| 1'   | 96.6 (CH)               | 4.44 d (7.6)               | H-2'                  | C-3, C-2' C-5'                       | H-2b, H-20, H-3', H-5'                       |
| 2'   | 83.3 (CH)               | 3.13 t (8.0)               | H-1', H-3'            | C-1', C-3', C-1''                    | H-19, H-1'', OH (4.94)                       |
| 3'   | 75.6 (CH)               | 3.25 t (8.7)               | H-2', H-4'            | C-1', C-2', C-4'                     | H-1', H-5', OH (4.94)                        |
| 4'   | 70.4 (CH)               | 3.0 m                      | H-3', H-5'            | C-3', C-5', C-6'                     |                                              |
| 5'   | 76.1 (CH)               | 3.11 m                     | H-4', H-6'a, H-6'b    | C-1', C-3', C-4', C-6'               | H-2b, H-1', H-3', H-6'b                      |
| 6'a  | 61.8 (CH <sub>2</sub> ) | 3.35 m                     | H-5'                  | C-5'                                 | H-1, H-19, H-6'b                             |
| 6'b  |                         | 3.73 dd (11.5, 1.5)        | H-5'                  | C-4'                                 | H-2b, H-5', H-6'a                            |
| 1''  | 100.9 (CH)              | 4.53 d (7.7)               | H-2''                 | C-2'', C-2'', C-3'', C-5''           | H-4b, H-5b, H-19, H-2', H-3''                |
| 2''  | 79.7 (CH)               | 3.7 dd (9.2, 8.0)          | H-1'', H-3''          | C-1'', C-3'', C-4''                  | H-4'', OH (4.94)                             |
| 3''  | 75.7 (CH)               | 3.37 t (9.0)               | H-2'', H-4''          | C-1'', C-2'', C-4''                  | H-1'', H-5''                                 |
| 4''  | 69.4 (CH)               | 3.29 t (9.3)               | H-3'', H-5''          | C-3'', C-5'', C-6''                  | H-2''                                        |
| 5''  | 76.4 (CH)               | 3.0 m                      | H-4'', H-6''a, H-6''b | C-1'', C-4''                         | H-4b, H-3''                                  |
| 6''a | 60 (CH <sub>2</sub> )   | 3.55 dd (11.6, 3.0)        | H-5''                 | C-4'', C-5''                         |                                              |
| 6''b |                         | 3.62 dd (11.7, 1.5)        | H-5''                 | C-4'', C-5''                         | H-4b, H-20                                   |
| OH   |                         | 4.1 brs                    |                       |                                      |                                              |
| OH   |                         | 4.28 brs                   |                       |                                      |                                              |
| OH   |                         | 4.47 brs                   |                       |                                      |                                              |
| OH   |                         | 4.94 s                     |                       | C-2', C-3', C-4'                     | H-2', H-3', H-2''                            |
| OH   |                         | 5.03 brs                   |                       |                                      |                                              |
| OH   |                         | 5.17 brs                   |                       |                                      |                                              |

NMR spectra for peyssonoside A (1)

Figure S14. <sup>1</sup>H NMR spectrum of peyssonoside A (1) at 700 MHz in DMSO-d<sub>6</sub>

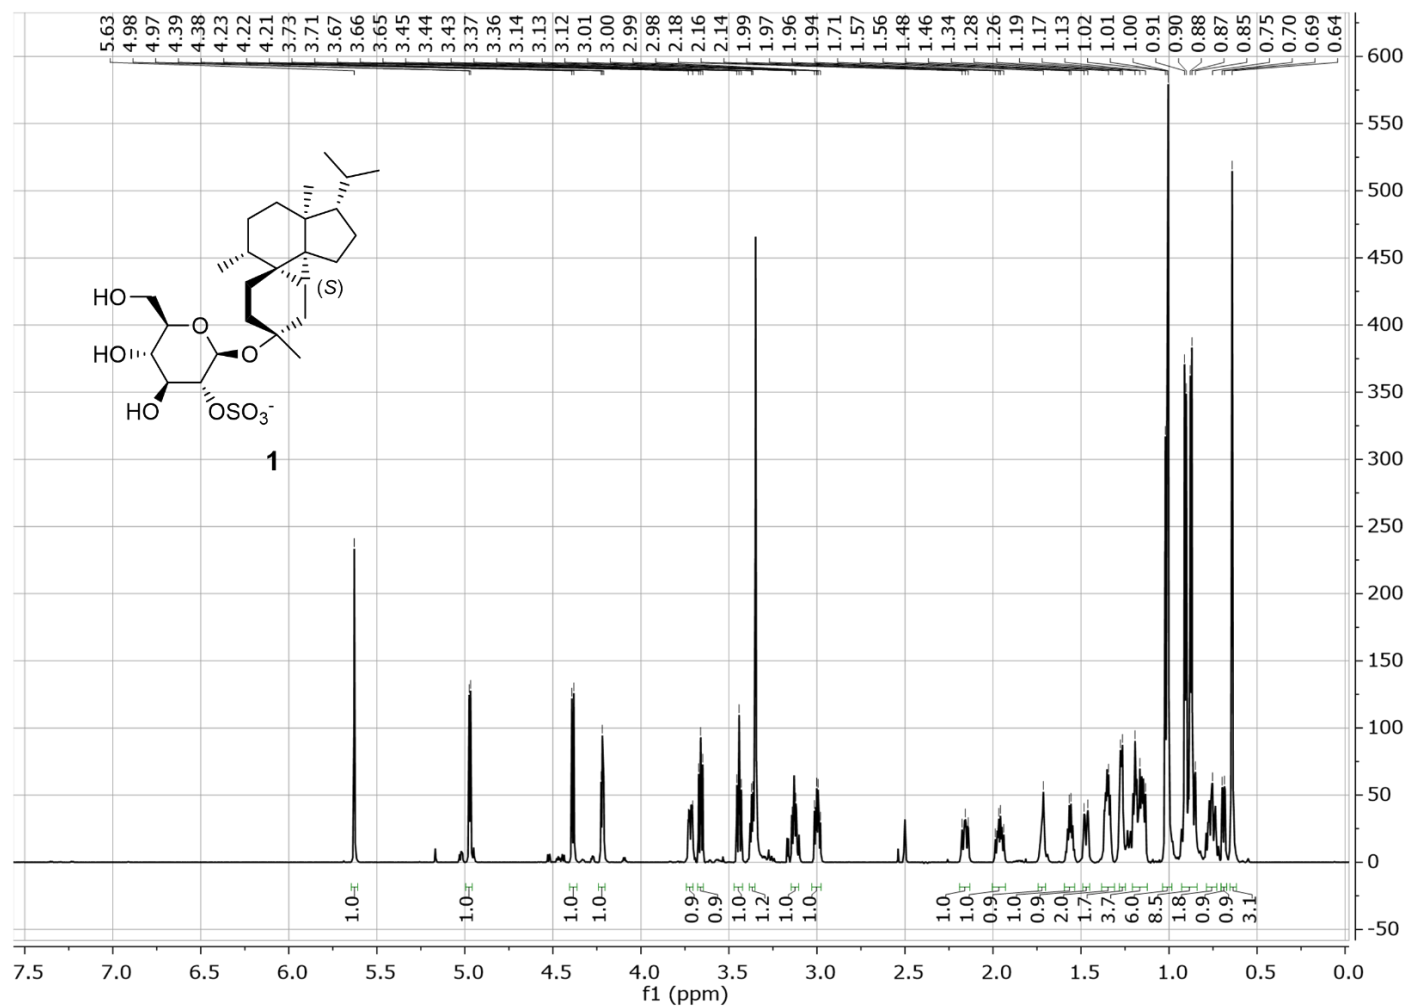

Figure S15.  $^{13}\text{C}$  NMR spectrum of peyssonnoside A (1) at 700 MHz in  $\text{DMSO-d}_6$

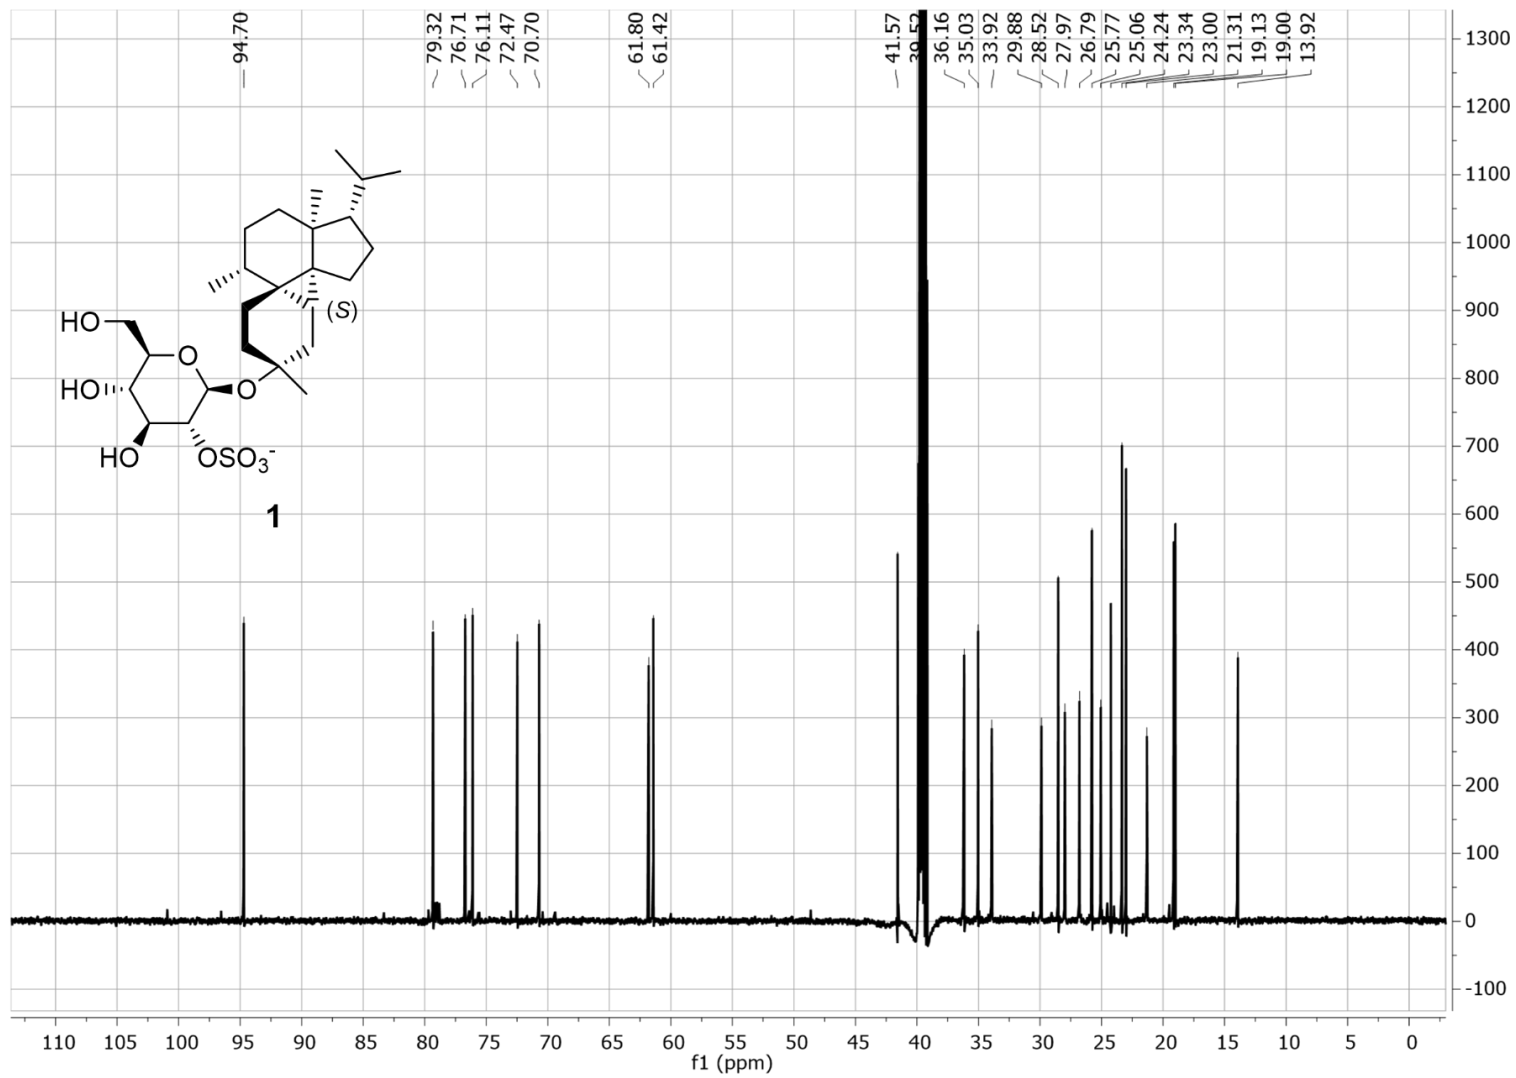

Figure S16. HSQC spectrum of peyssonoside A (1) at 700 MHz in DMSO-d<sub>6</sub>

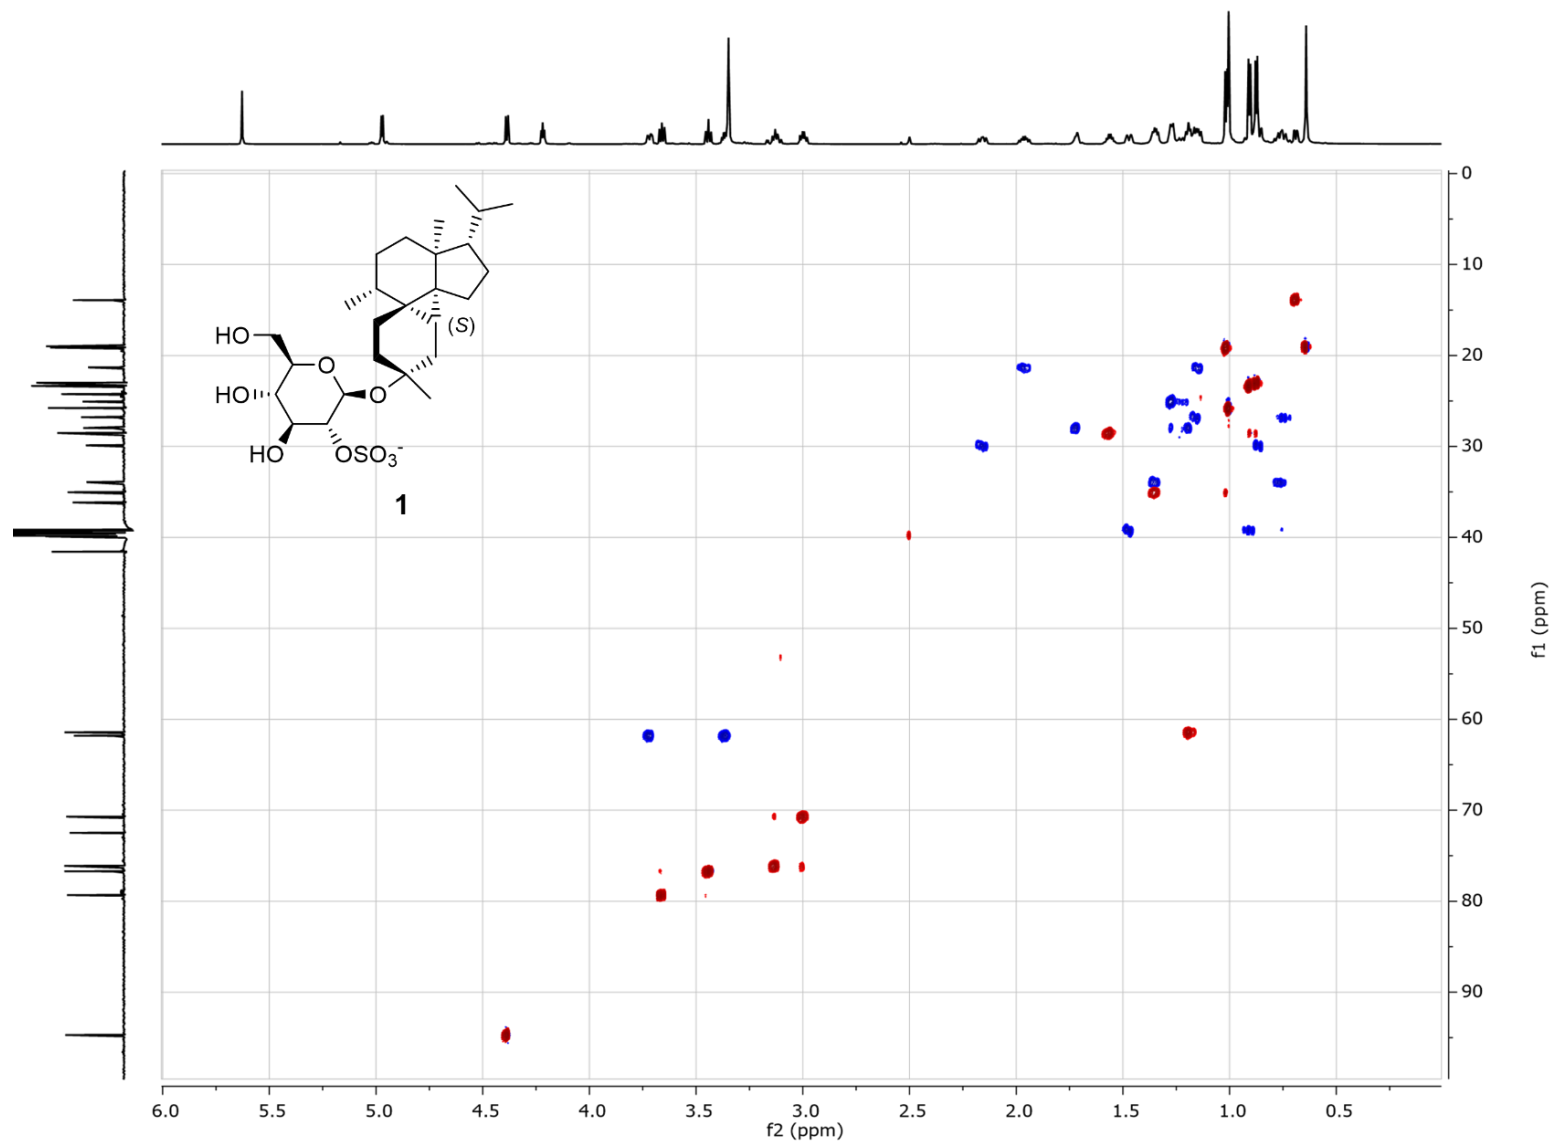



Figure S17. COSY spectrum of peyssonoside A (1) at 700 MHz in DMSO-d<sub>6</sub>

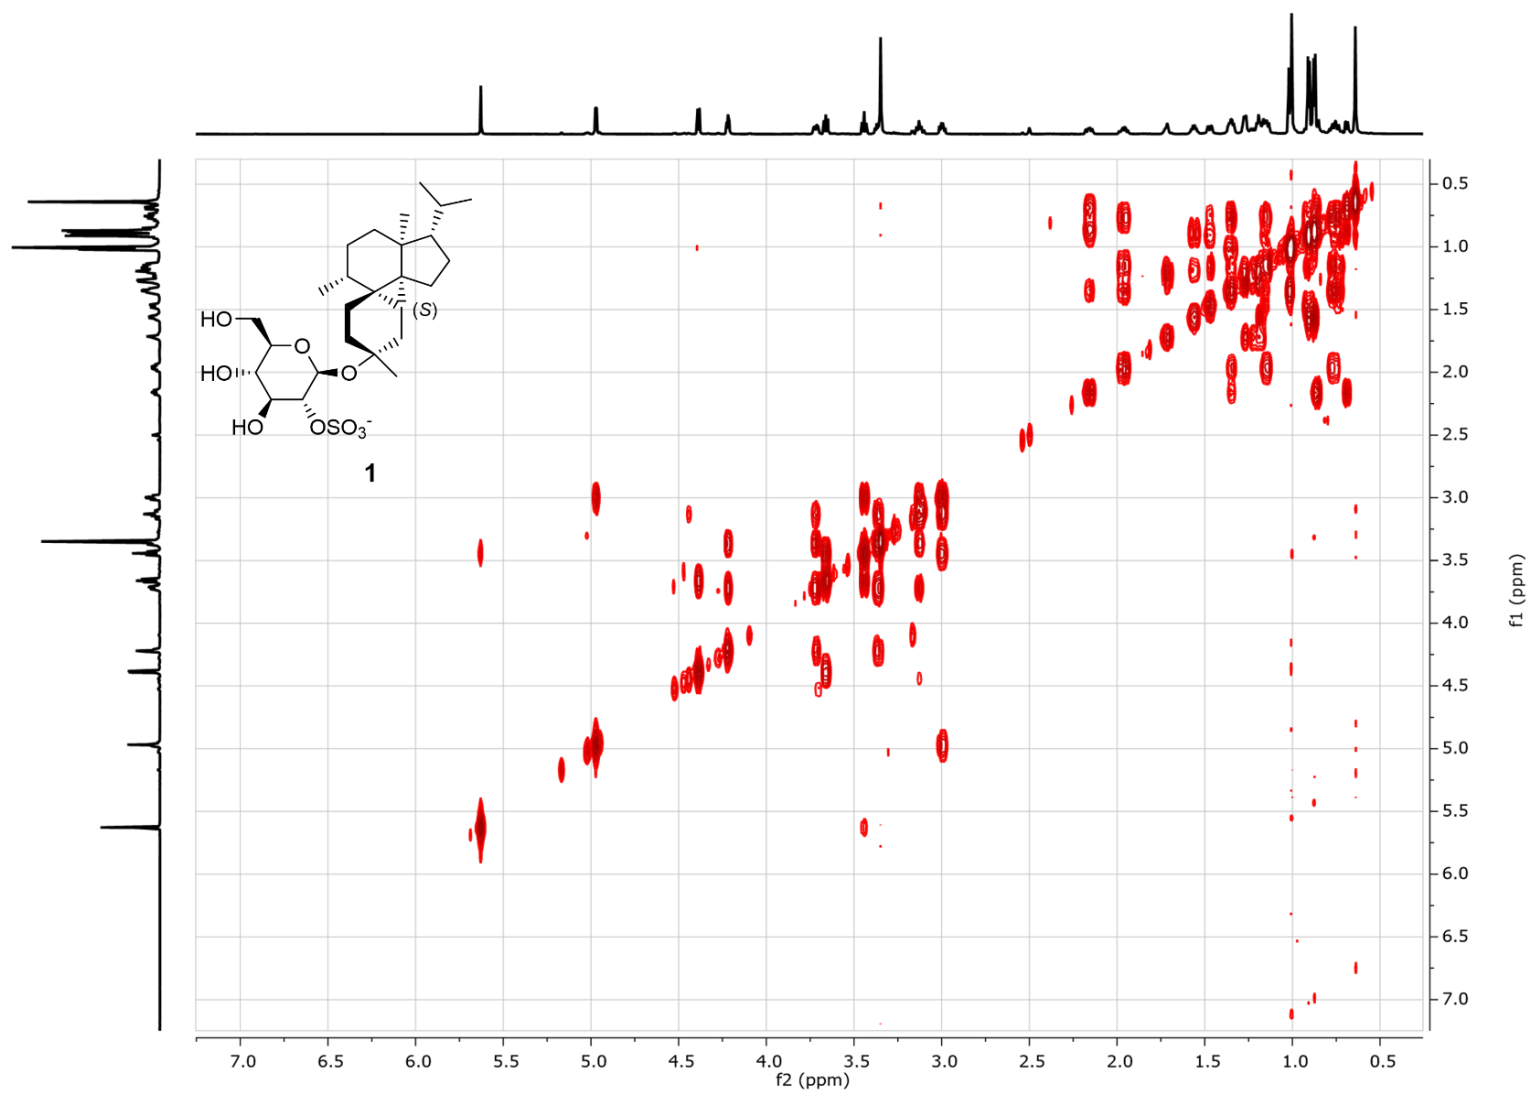

Figure S18. HMBC spectrum of peyssonoside A (**1**) at 700 MHz in DMSO-d<sub>6</sub>

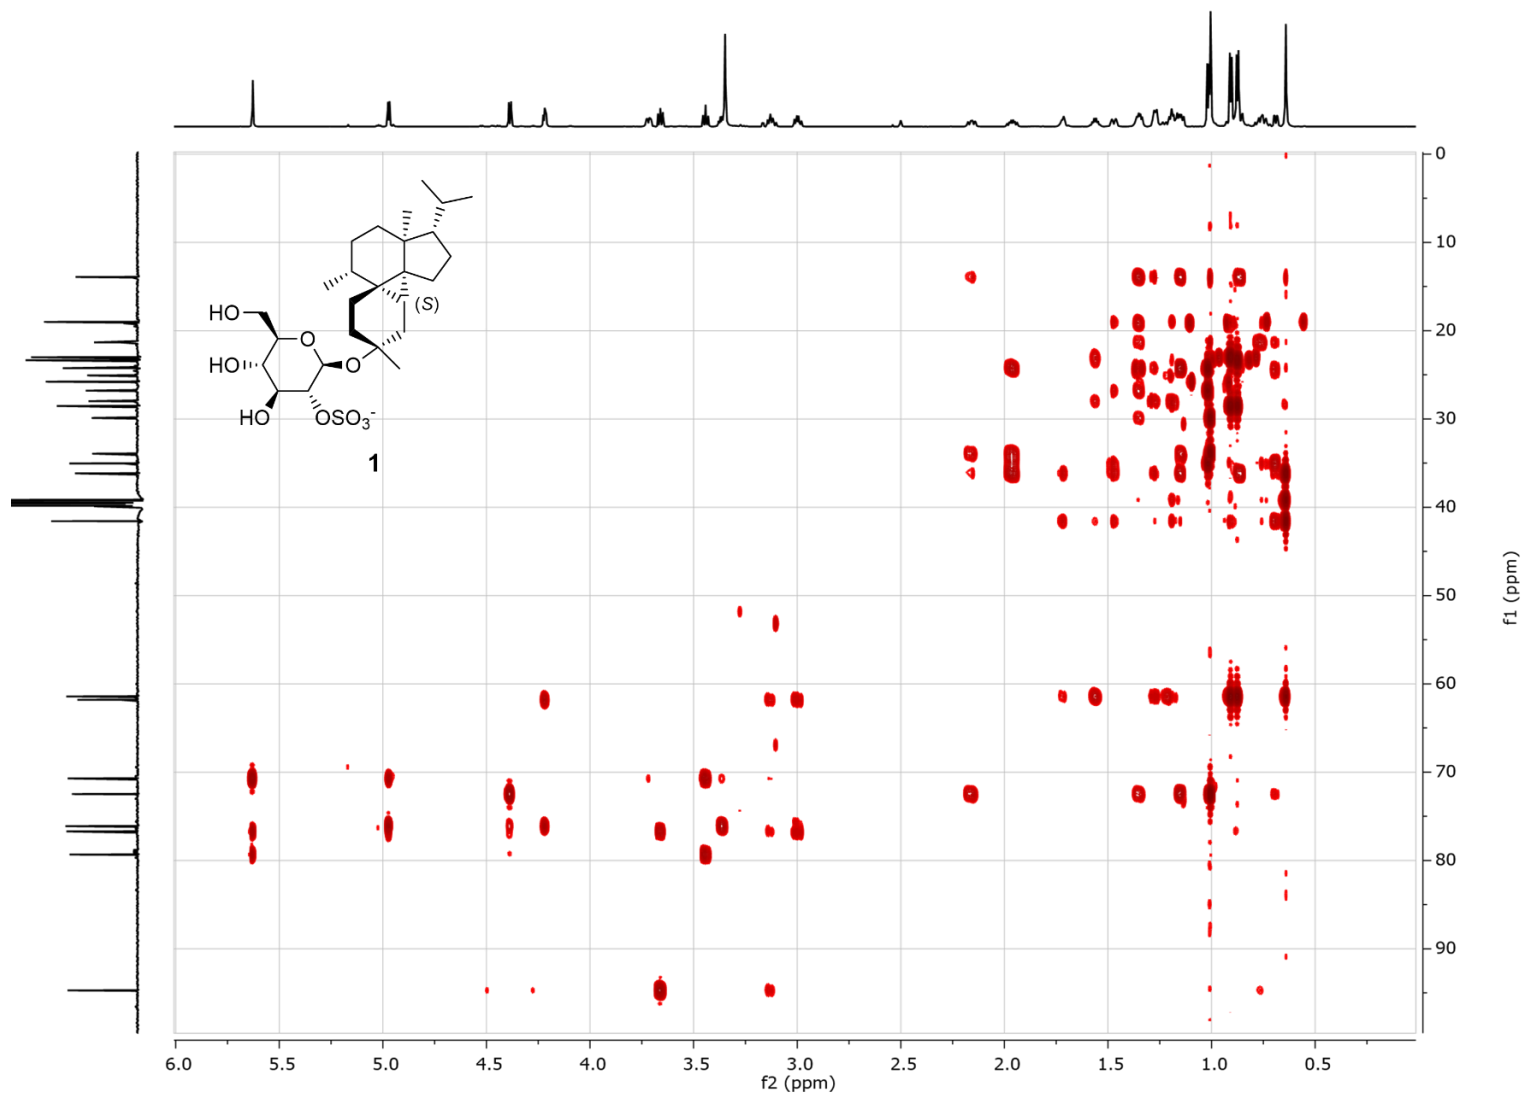

Figure S19.  $J_{CH}$  coupled HSQC spectrum of peyssonnoside A (**1**) at 700 MHz in DMSO- $d_6$

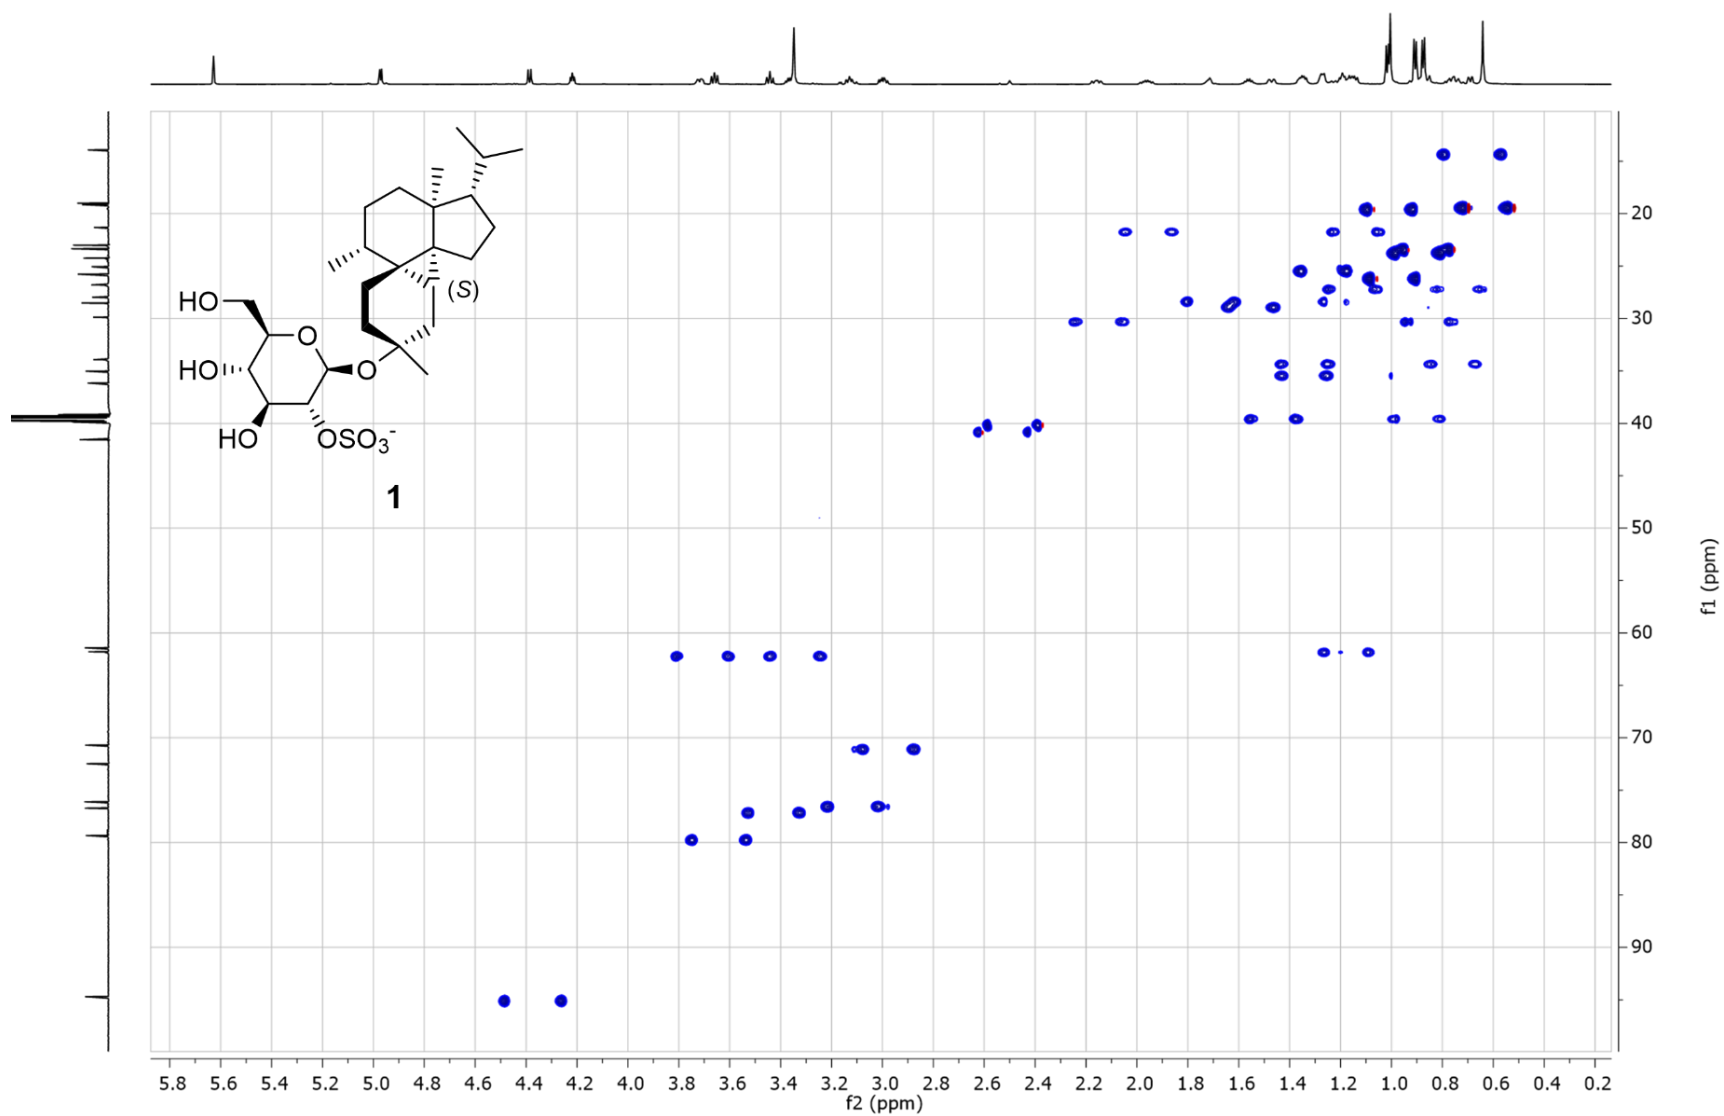

Figure S20. HSQC-ROESY spectrum of peyssonoside A (1) at 700 MHz in DMSO-d<sub>6</sub>

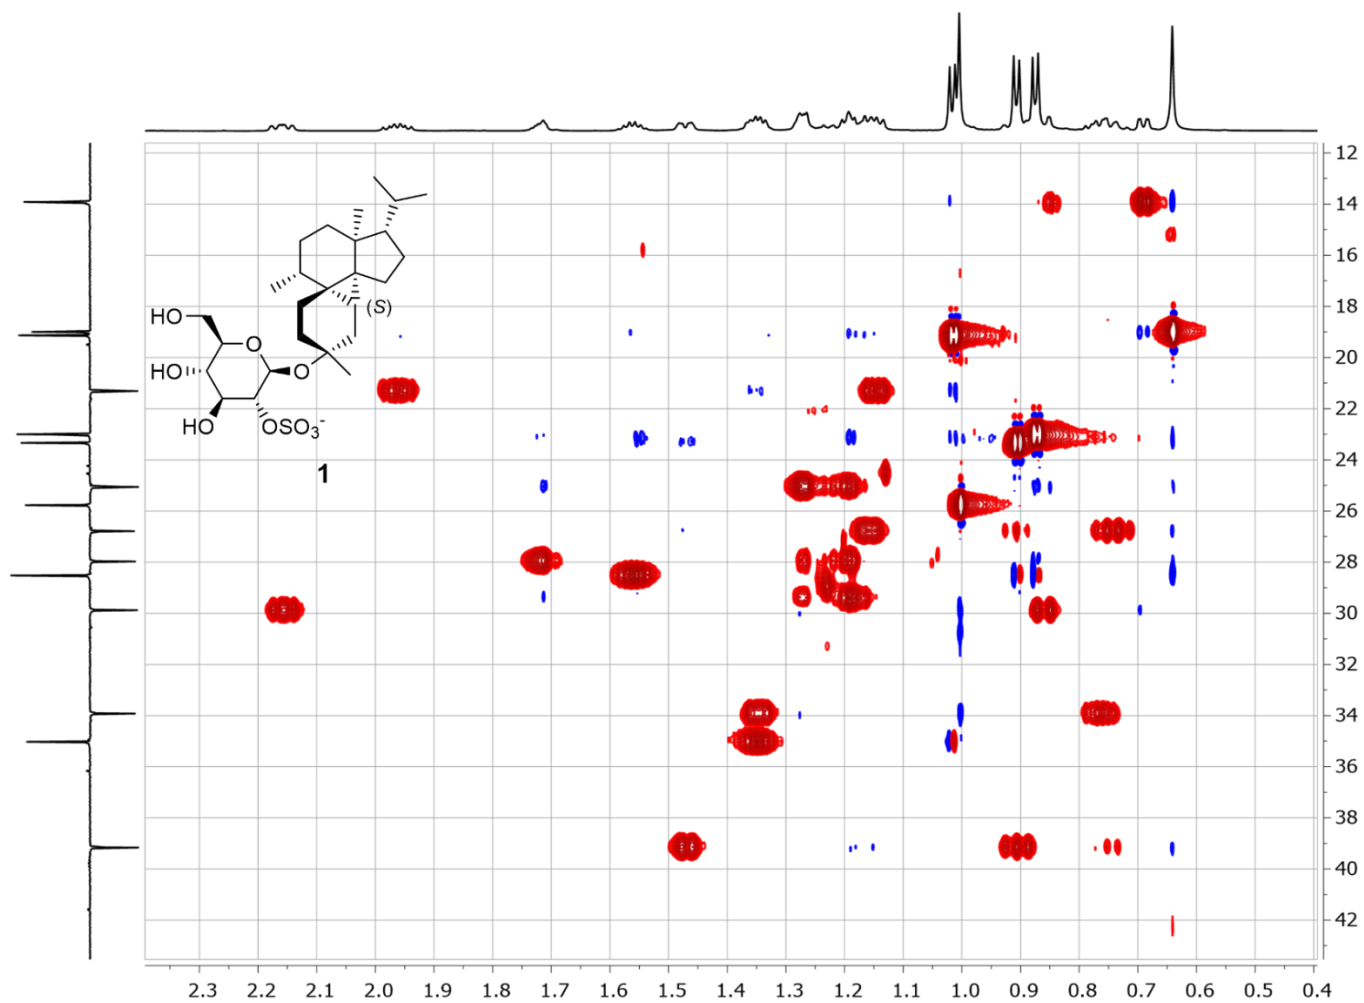

Figure S21. ROESY spectrum of peyssonoside A (**1**) at 700 MHz in DMSO-d<sub>6</sub>

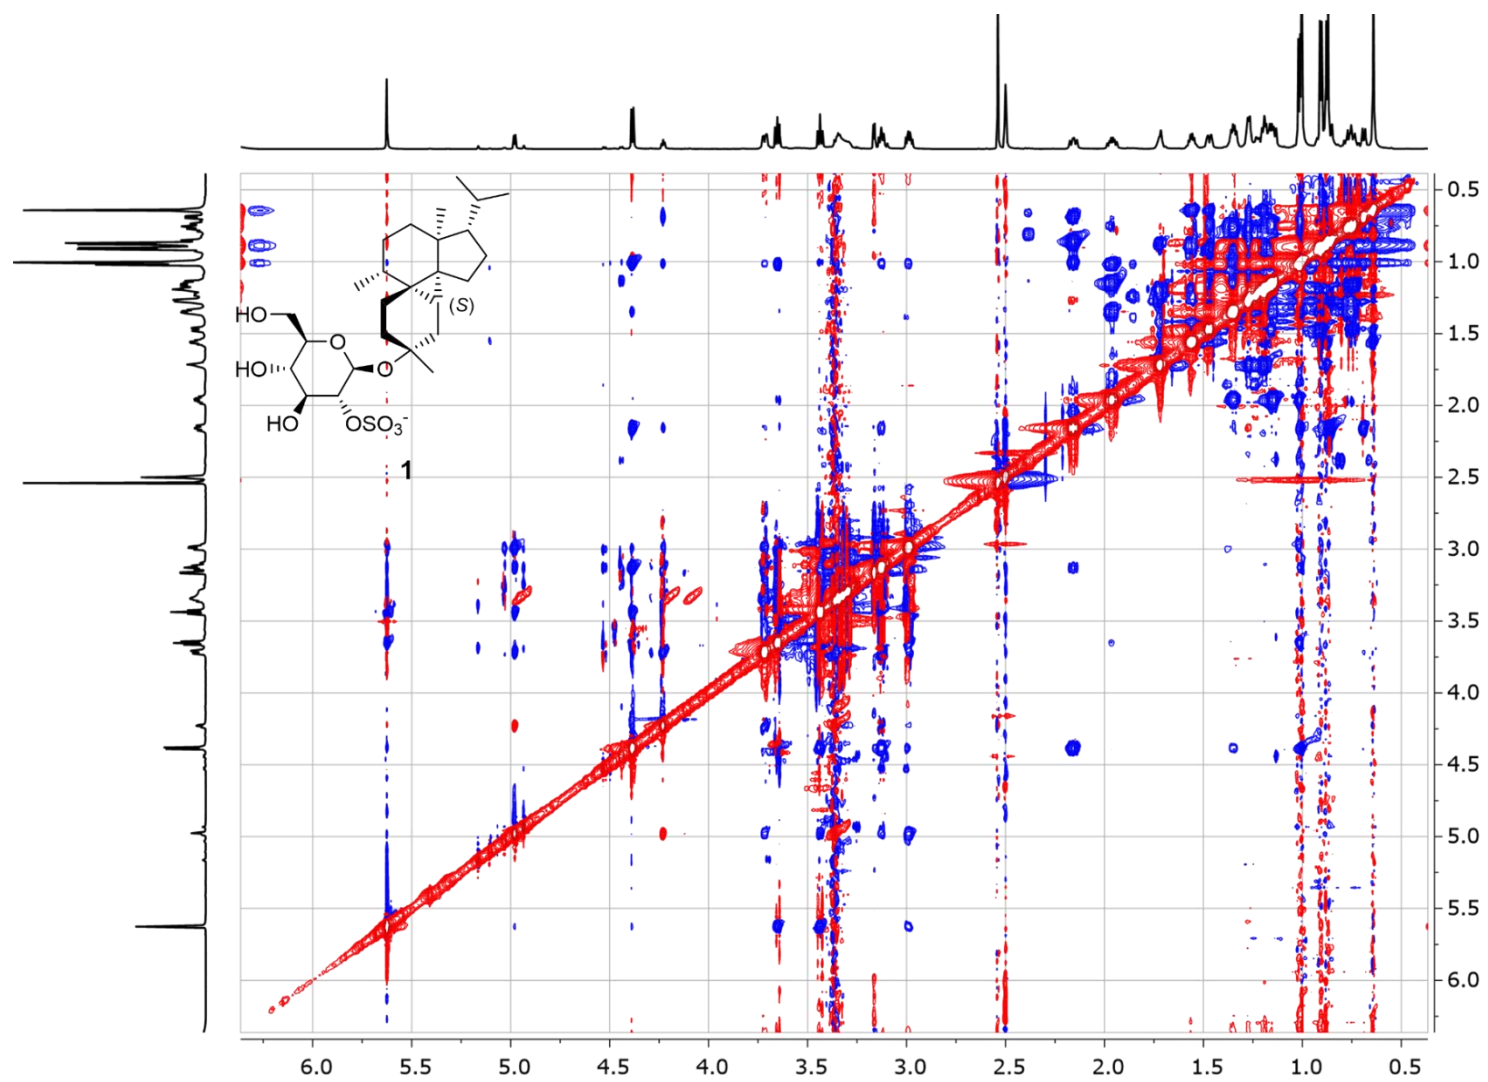

NMR spectra for peyssonoside B (2)

Figure S22. <sup>1</sup>H NMR spectrum of peyssonoside B (2) at 800 MHz in DMSO-d<sub>6</sub>

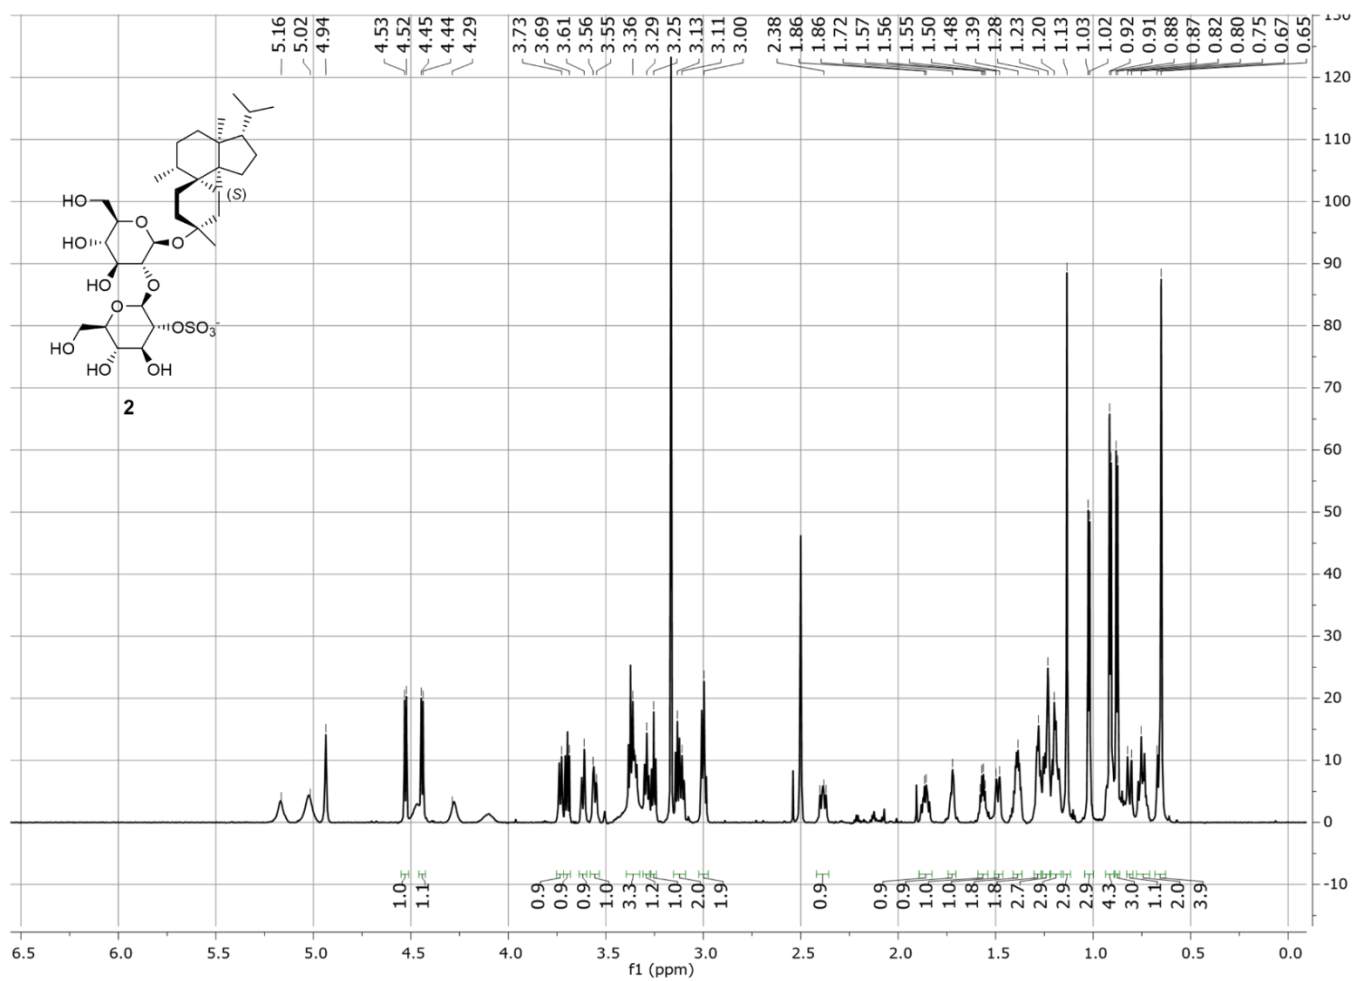

Figure S23.  $^{13}\text{C}$  spectrum of peyssonoside B (**2**) at 800 MHz in  $\text{DMSO-d}_6$

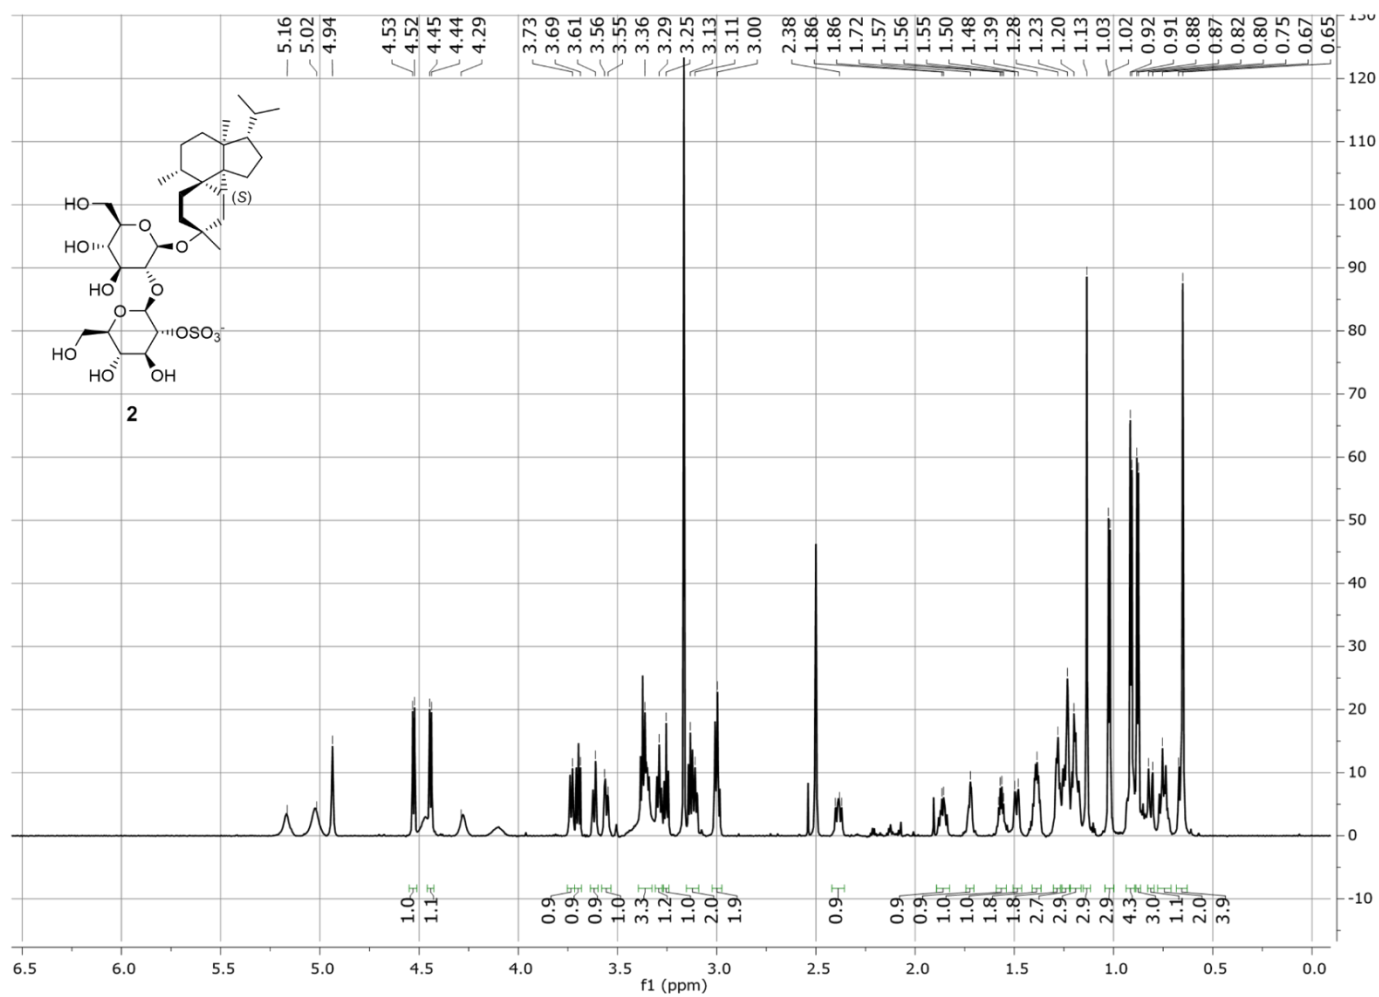

Figure S24. HSQC spectrum of peyssonoside B (2) at 800 MHz in DMSO-d<sub>6</sub>

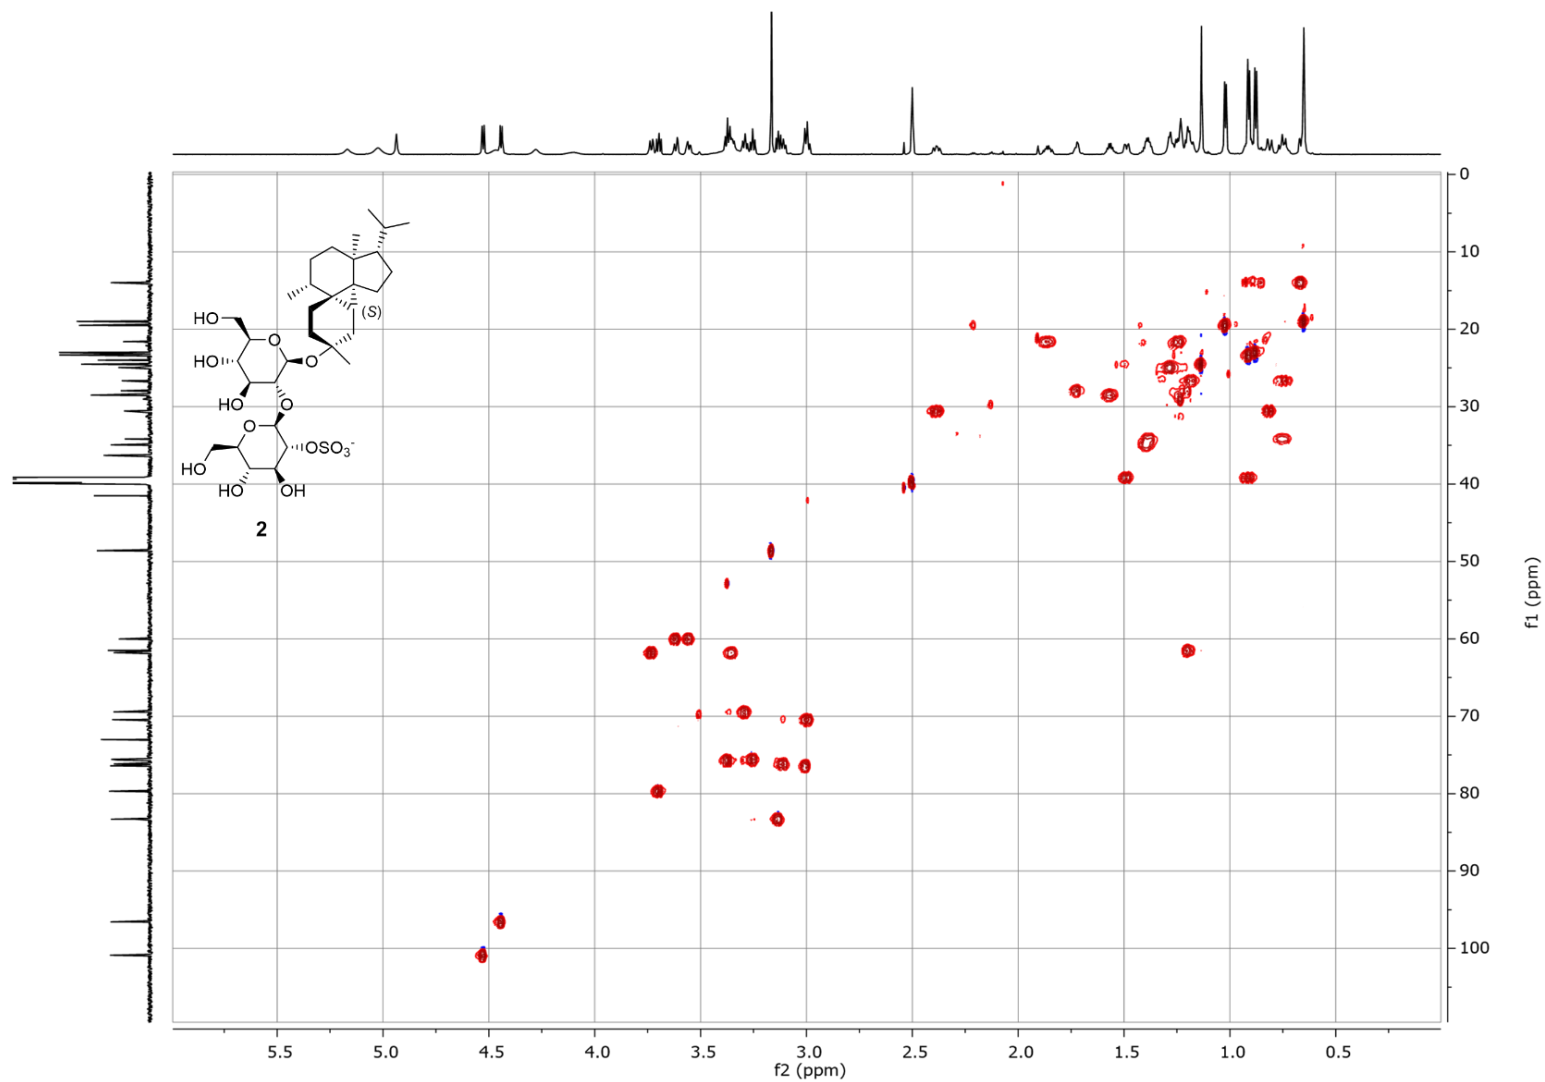



Figure S25. COSY spectrum of peyssonnoside B (**2**) at 800 MHz in DMSO-d<sub>6</sub>

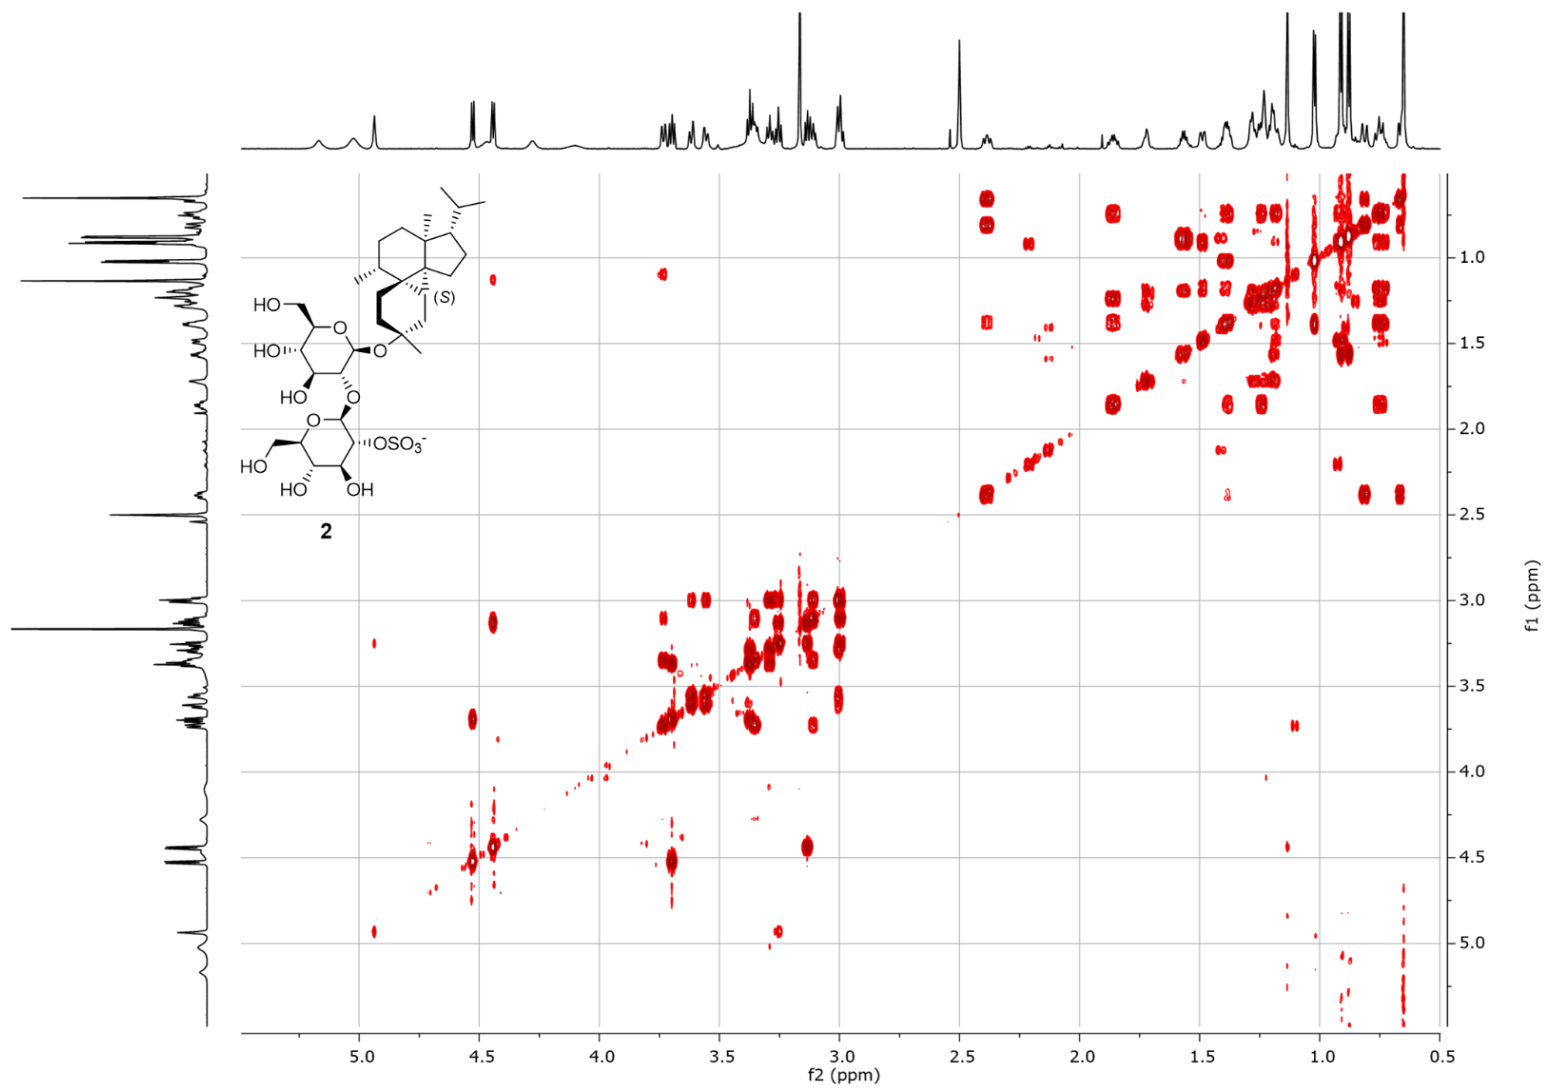

Figure S26. HMBC spectrum of peyssonoside B (**2**) at 800 MHz in DMSO-d<sub>6</sub>

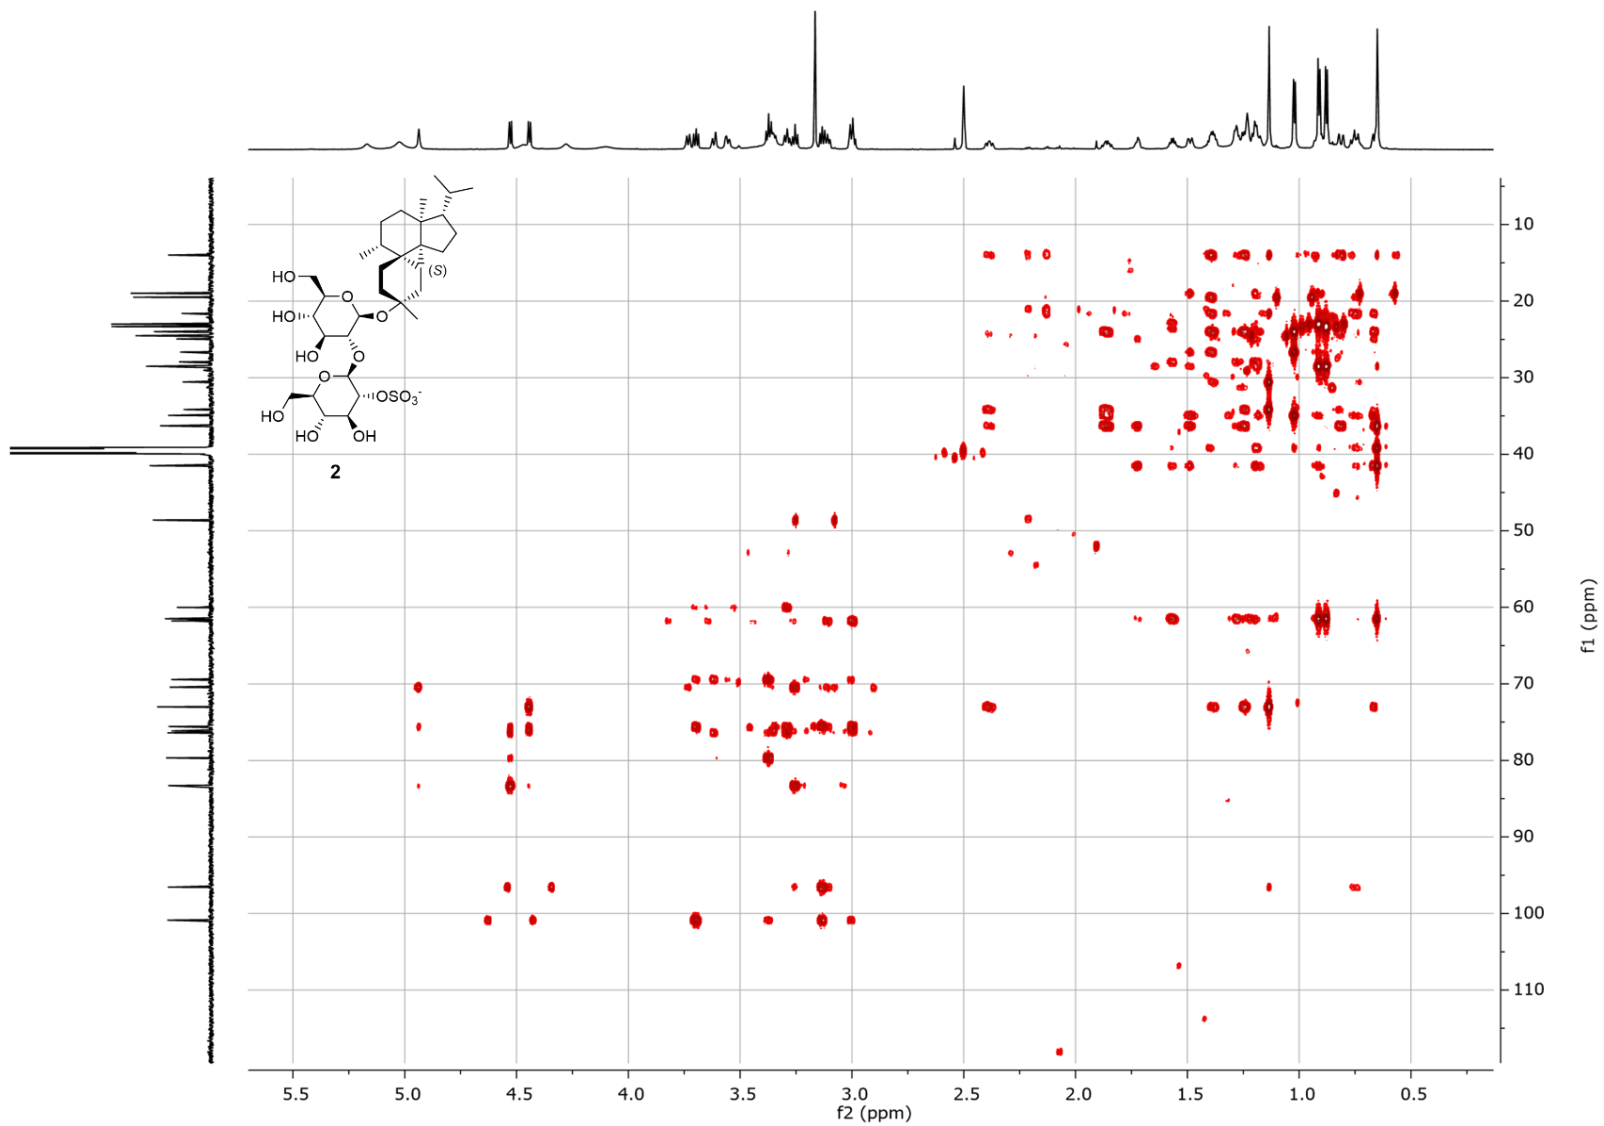

Figure S27. TOCSY spectrum of peyssonoside B (2) at 800 MHz in DMSO-d<sub>6</sub>

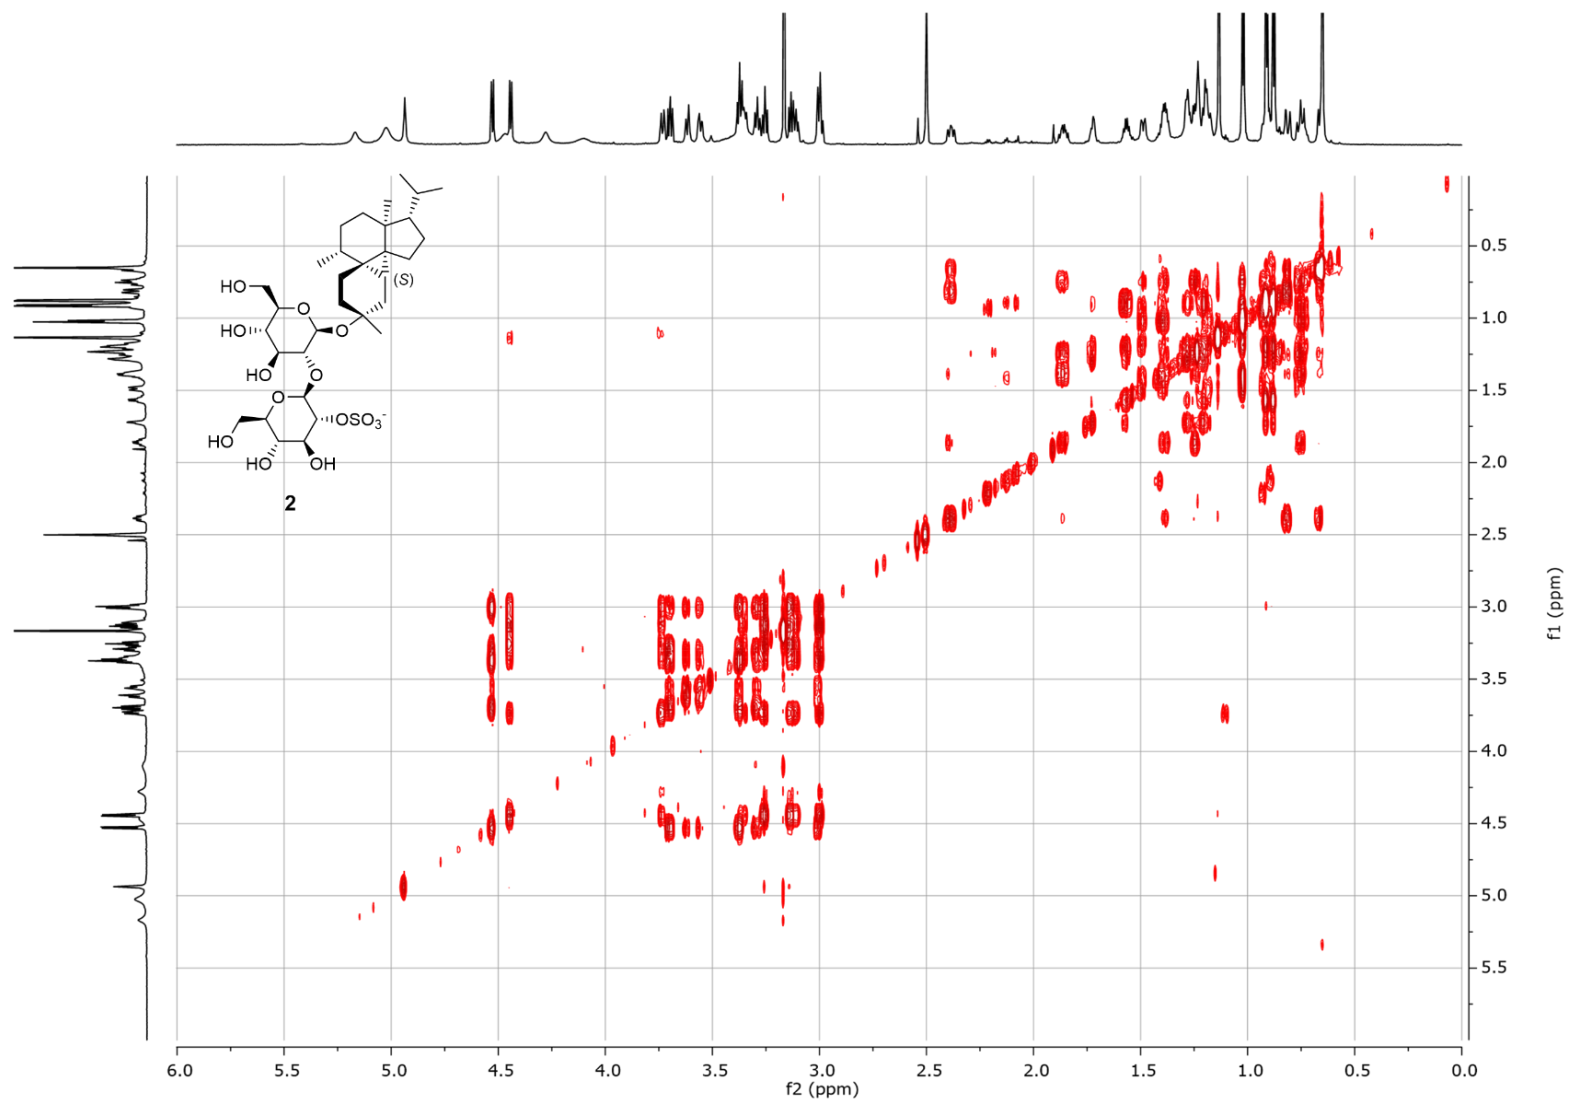

Figure S28. ROESY spectrum of peyssonnoside B (2) at 800 MHz in DMSO-d<sub>6</sub>

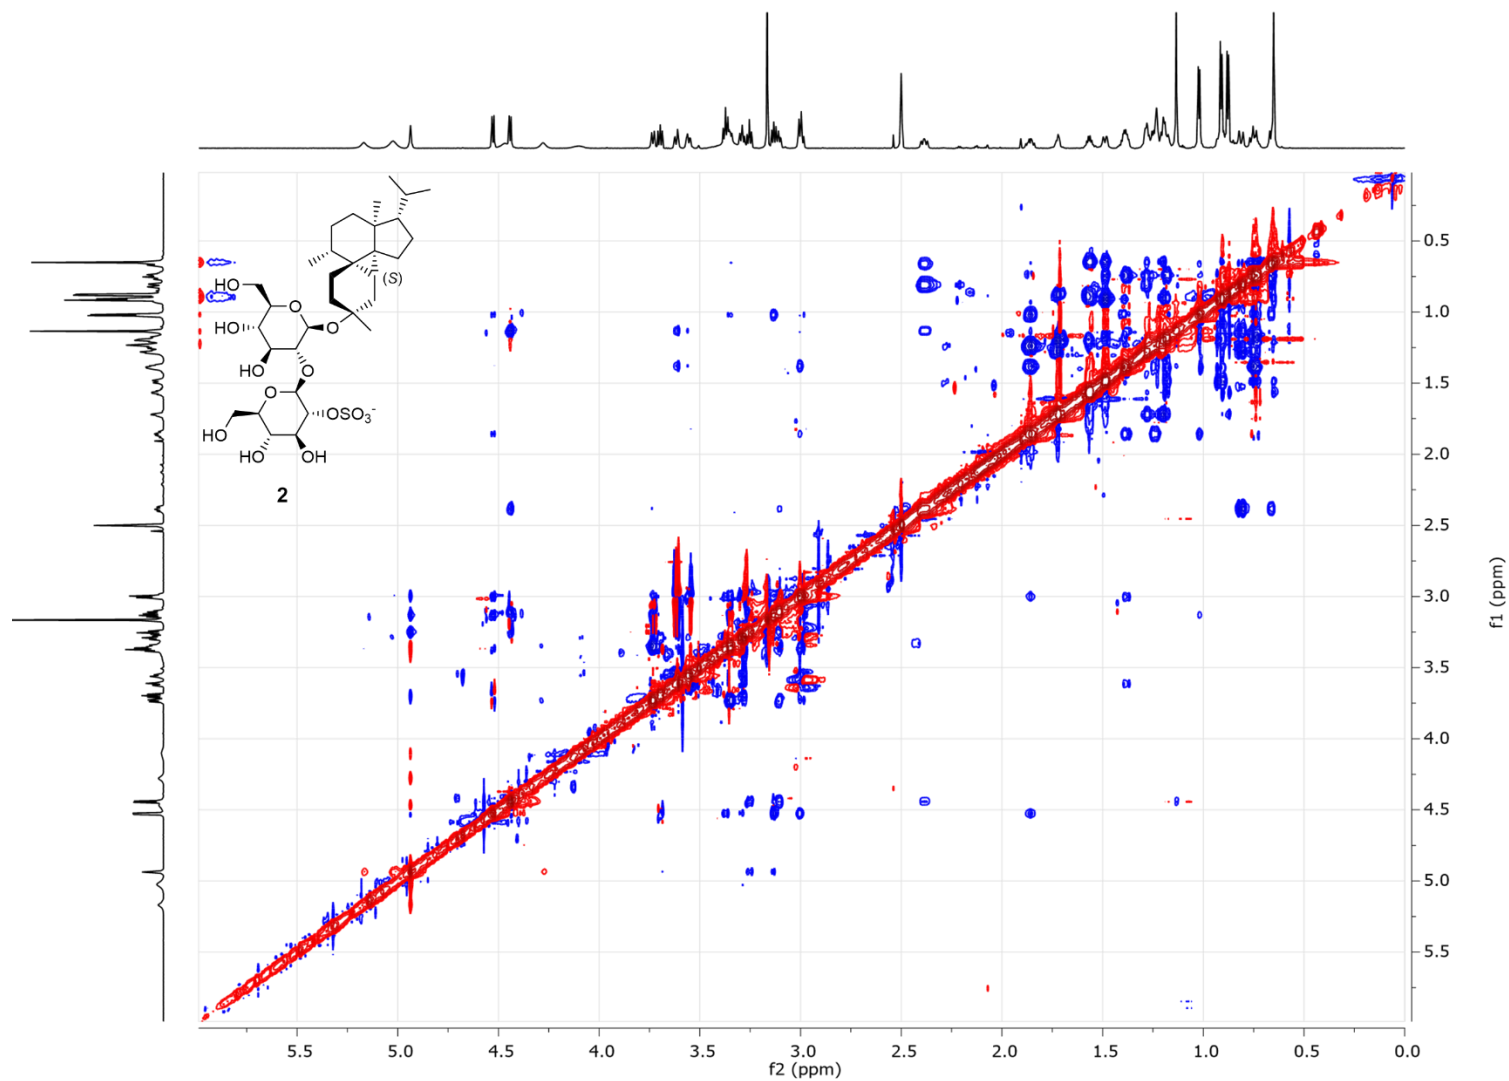

**Figure S29.** 1D ROESY slice extracted from 2D ROESY spectrum of peyssonoside A (**1**) at 700 MHz in DMSO-d<sub>6</sub>

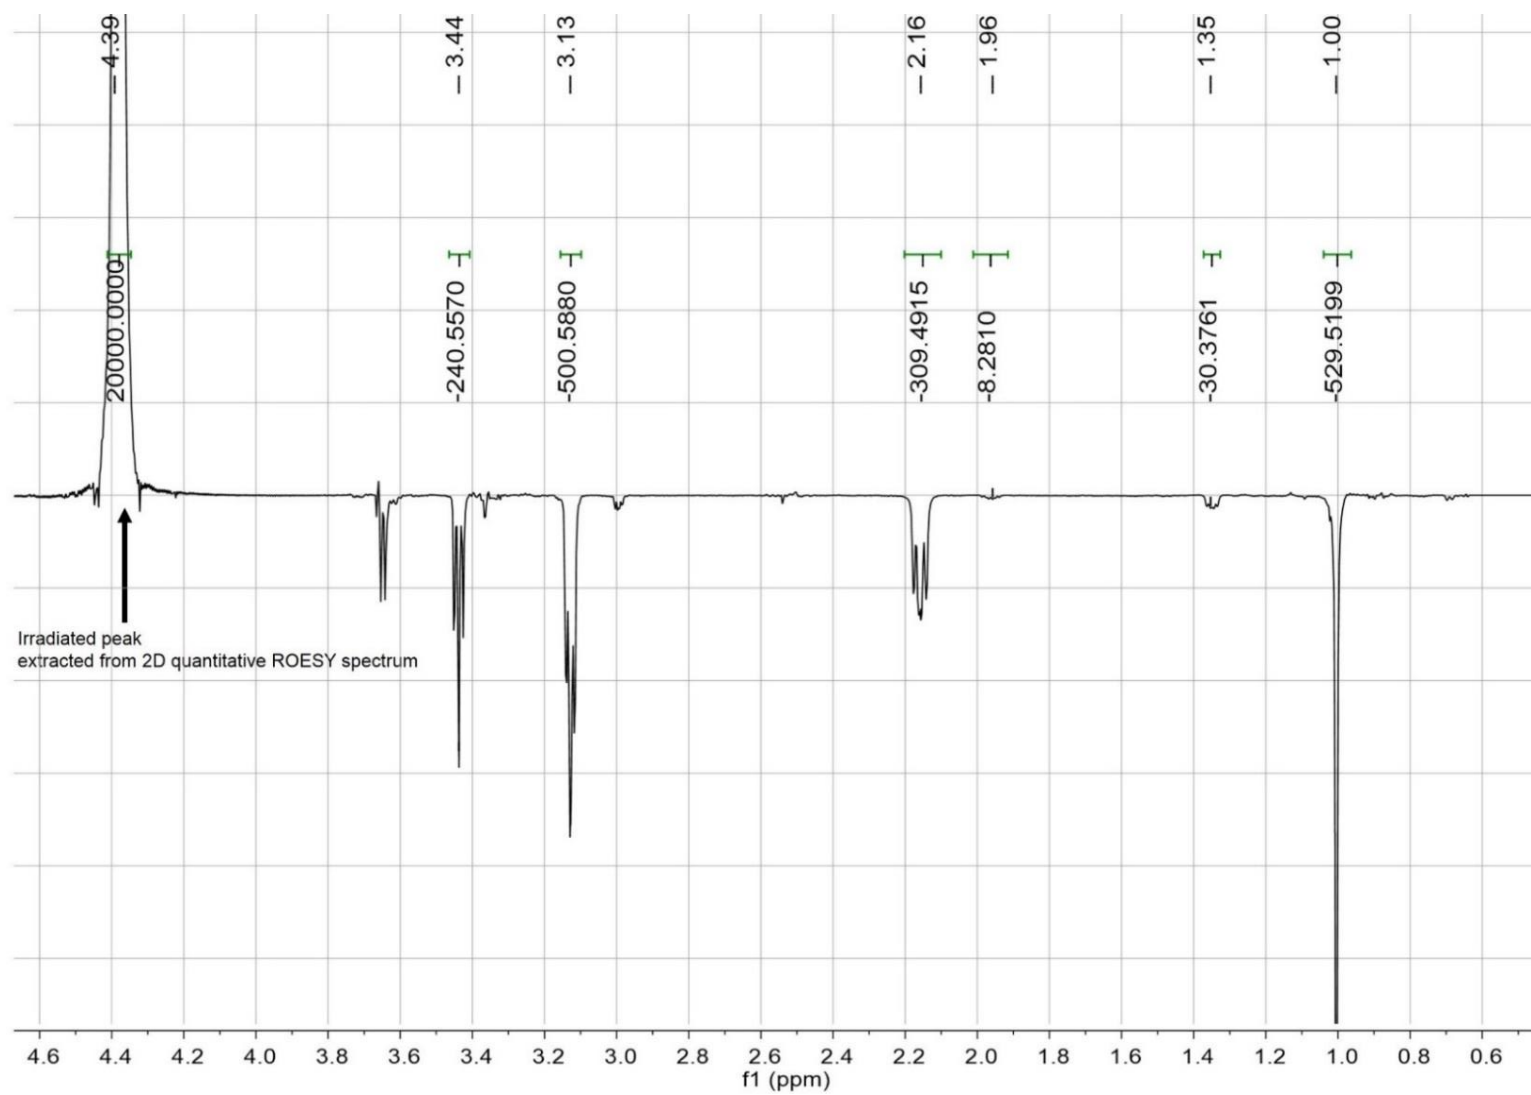

**Figure S30.** 1D ROESY slice extracted from 2D ROESY spectrum of peyssonoside A (**1**) at 700 MHz in DMSO-d<sub>6</sub>

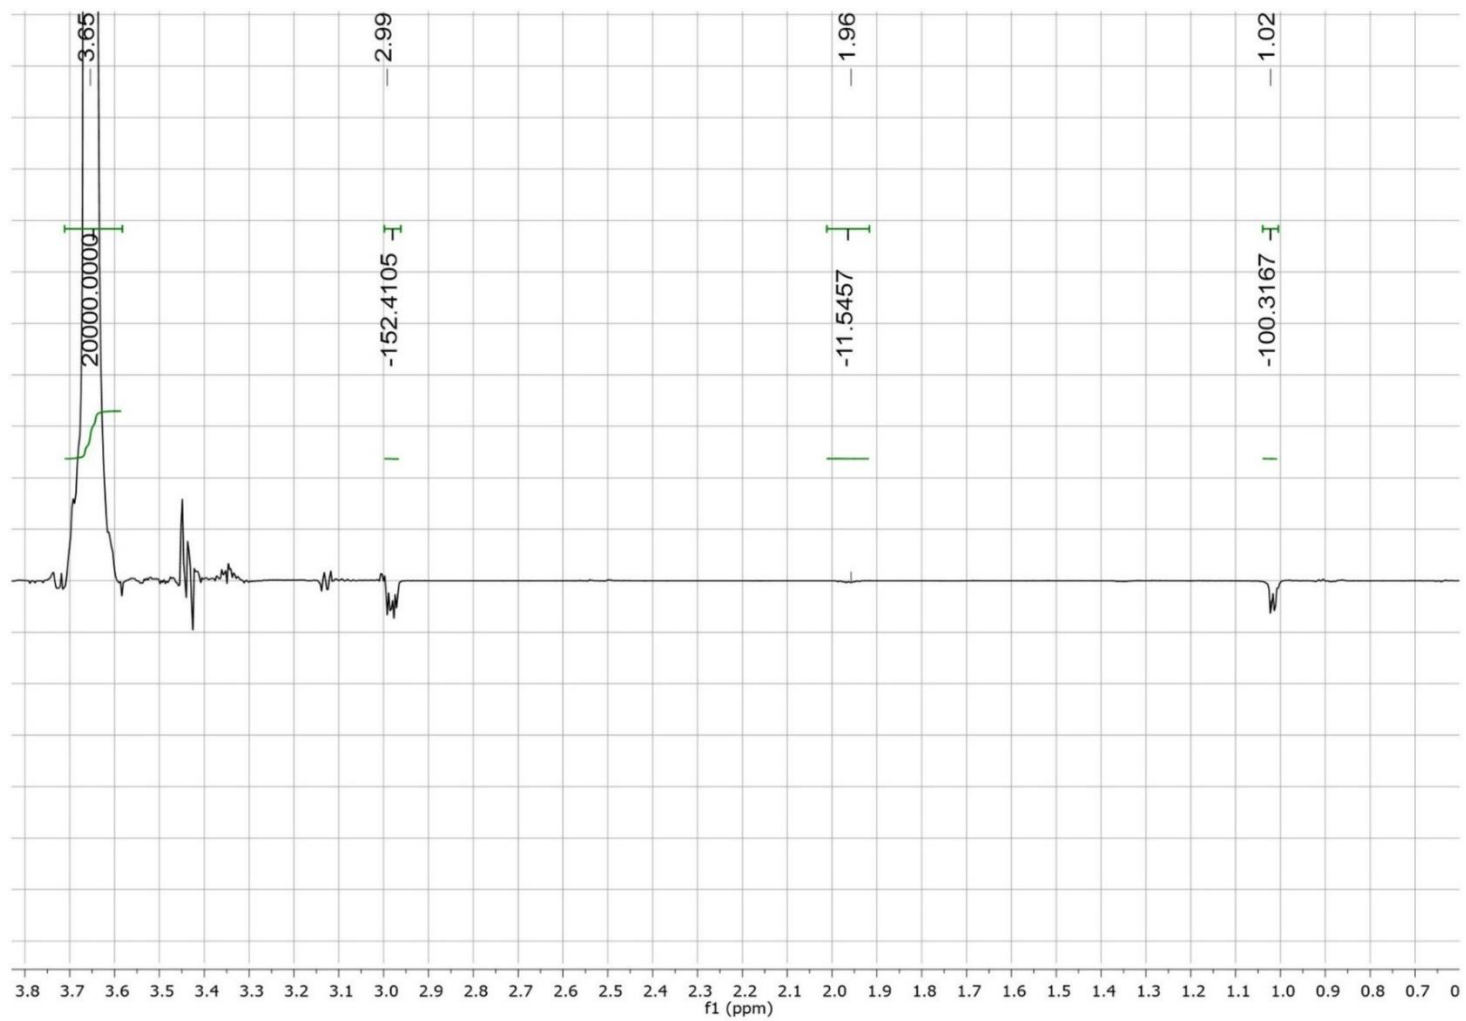

**Figure S31.** 1D ROESY slice extracted from 2D ROESY spectrum of peyssonoside A (**1**) at 700 MHz in DMSO-d<sub>6</sub>

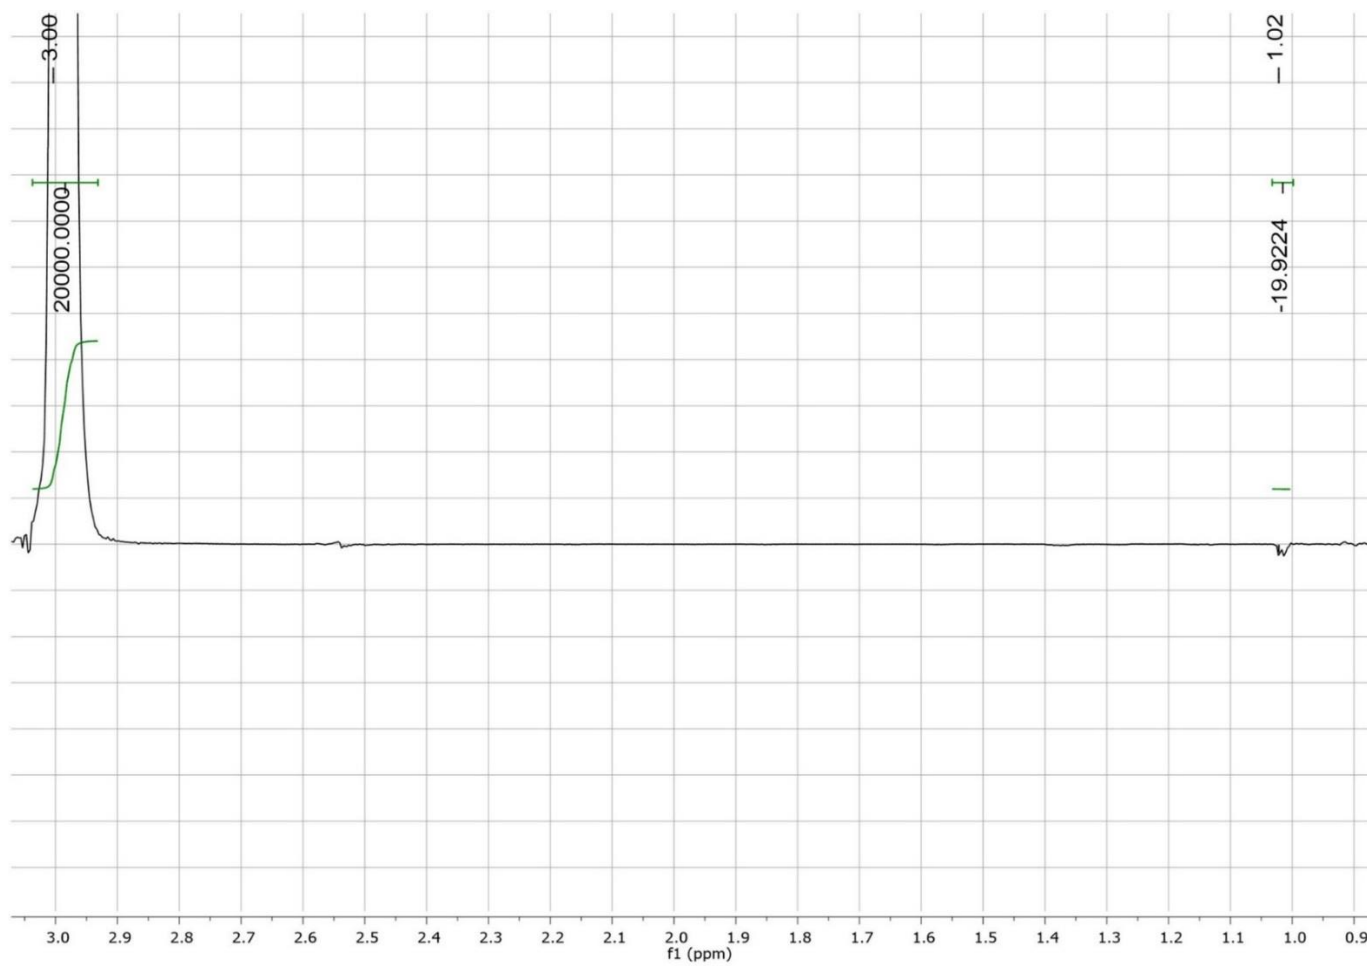

**Figure S32.** 1D ROESY slice extracted from 2D ROESY spectrum of peyssonoside A (**1**) at 700 MHz in DMSO-d<sub>6</sub>

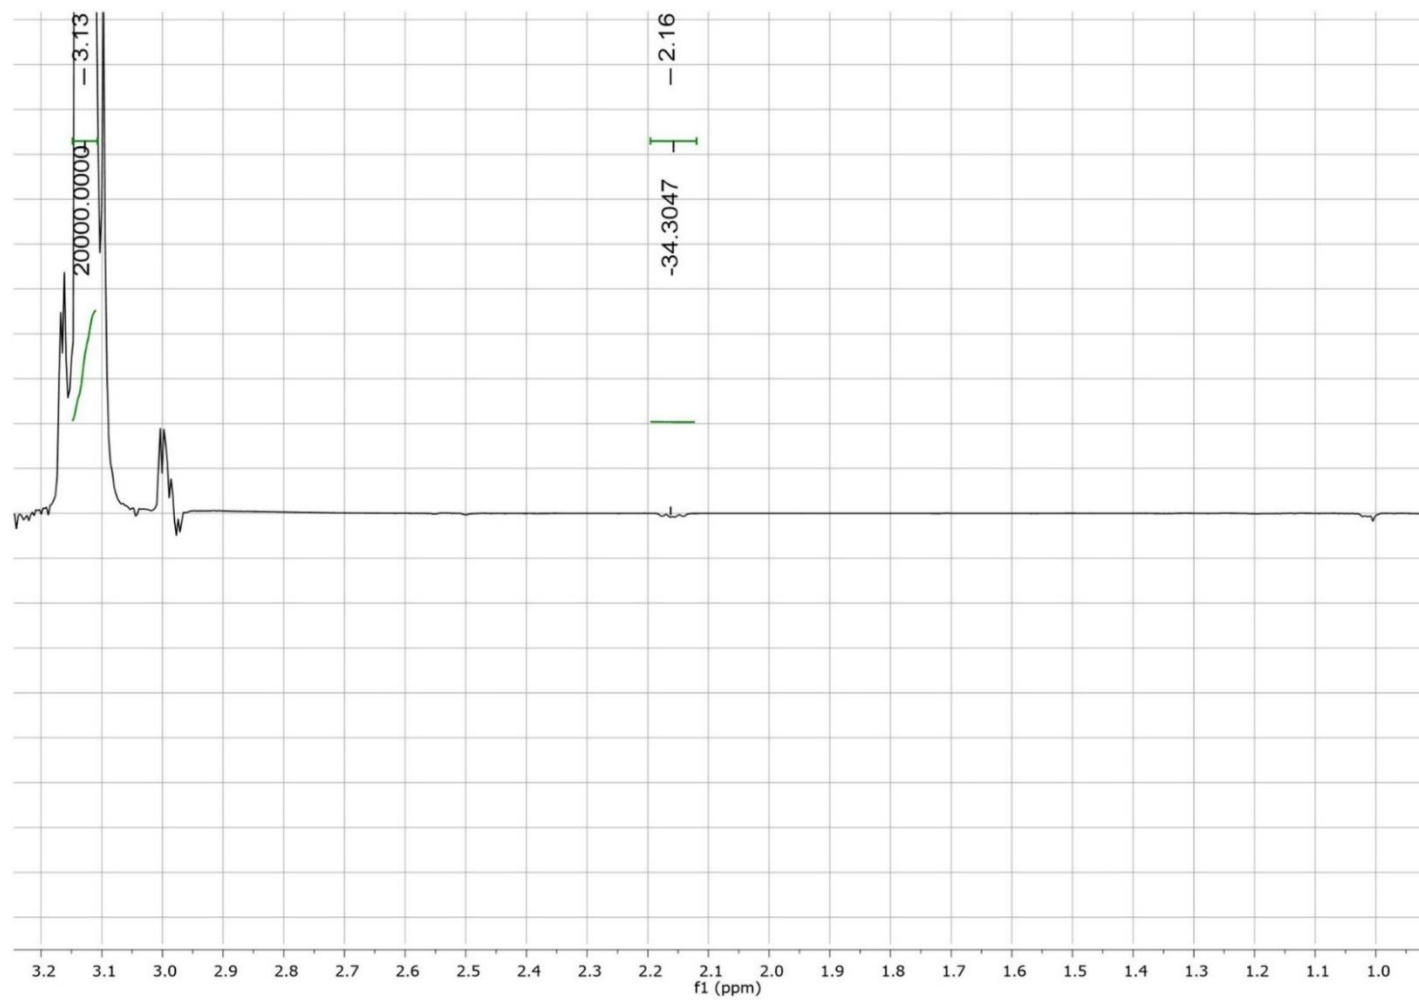



**Figure S33.** 1D ROESY slice extracted from 2D ROESY spectrum of peyssonoside A (**1**) at 700 MHz in DMSO-d<sub>6</sub>

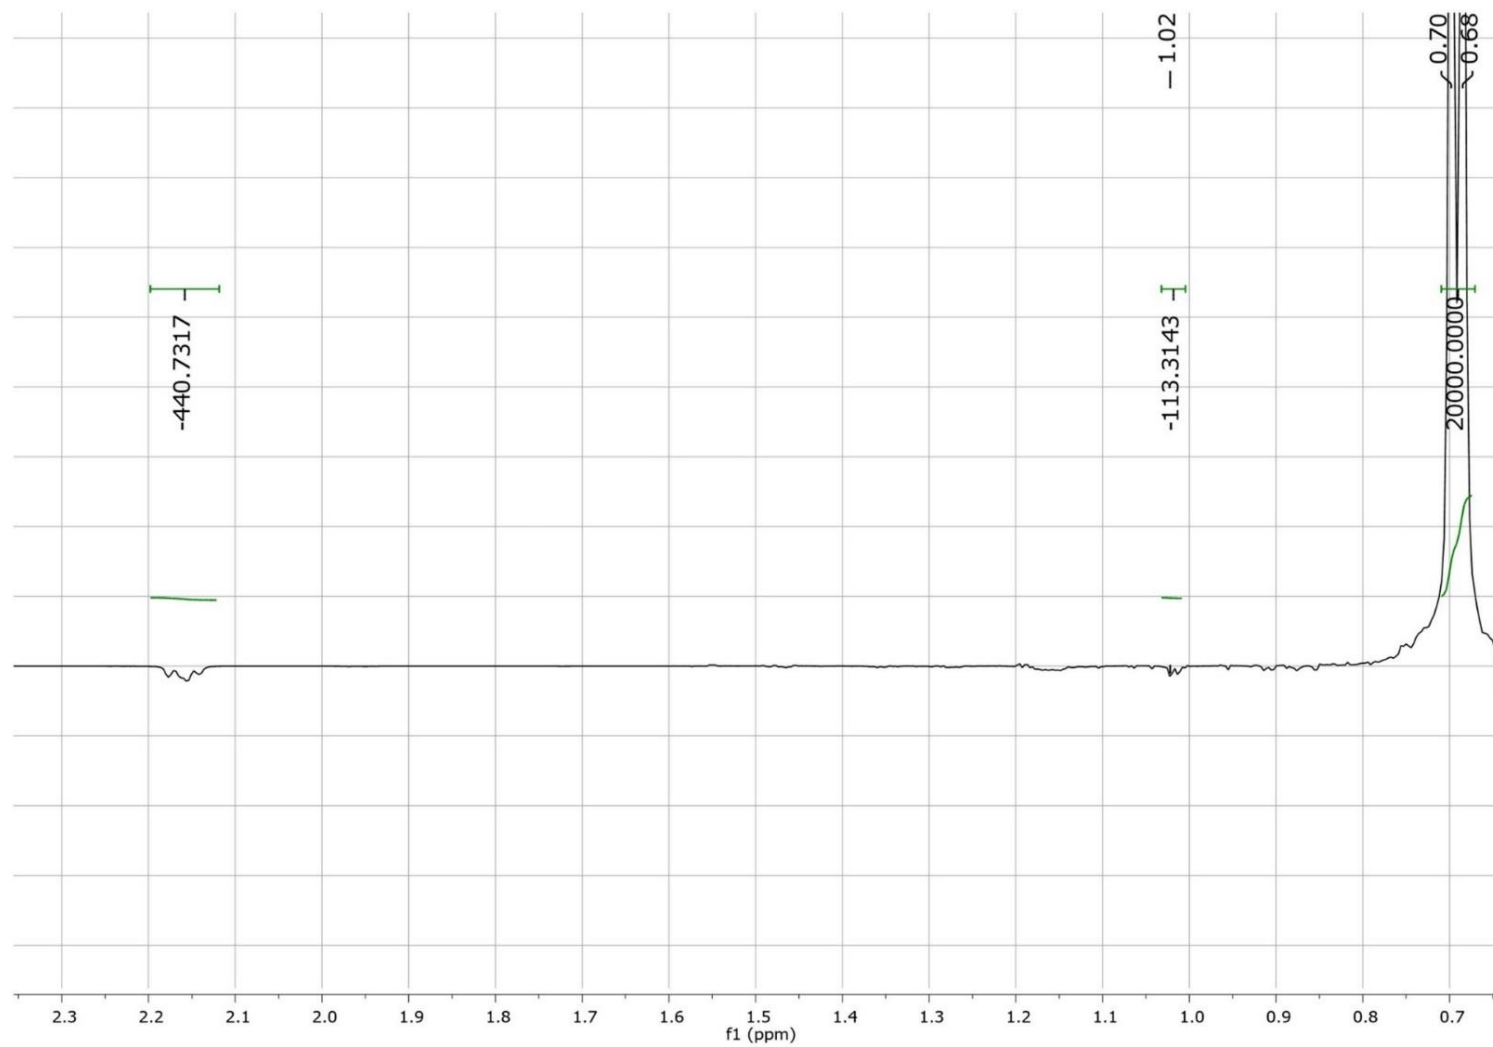

**Figure S34.** 1D ROESY slice extracted from 2D ROESY spectrum of peyssonoside A (**1**) at 700 MHz in DMSO-d<sub>6</sub>

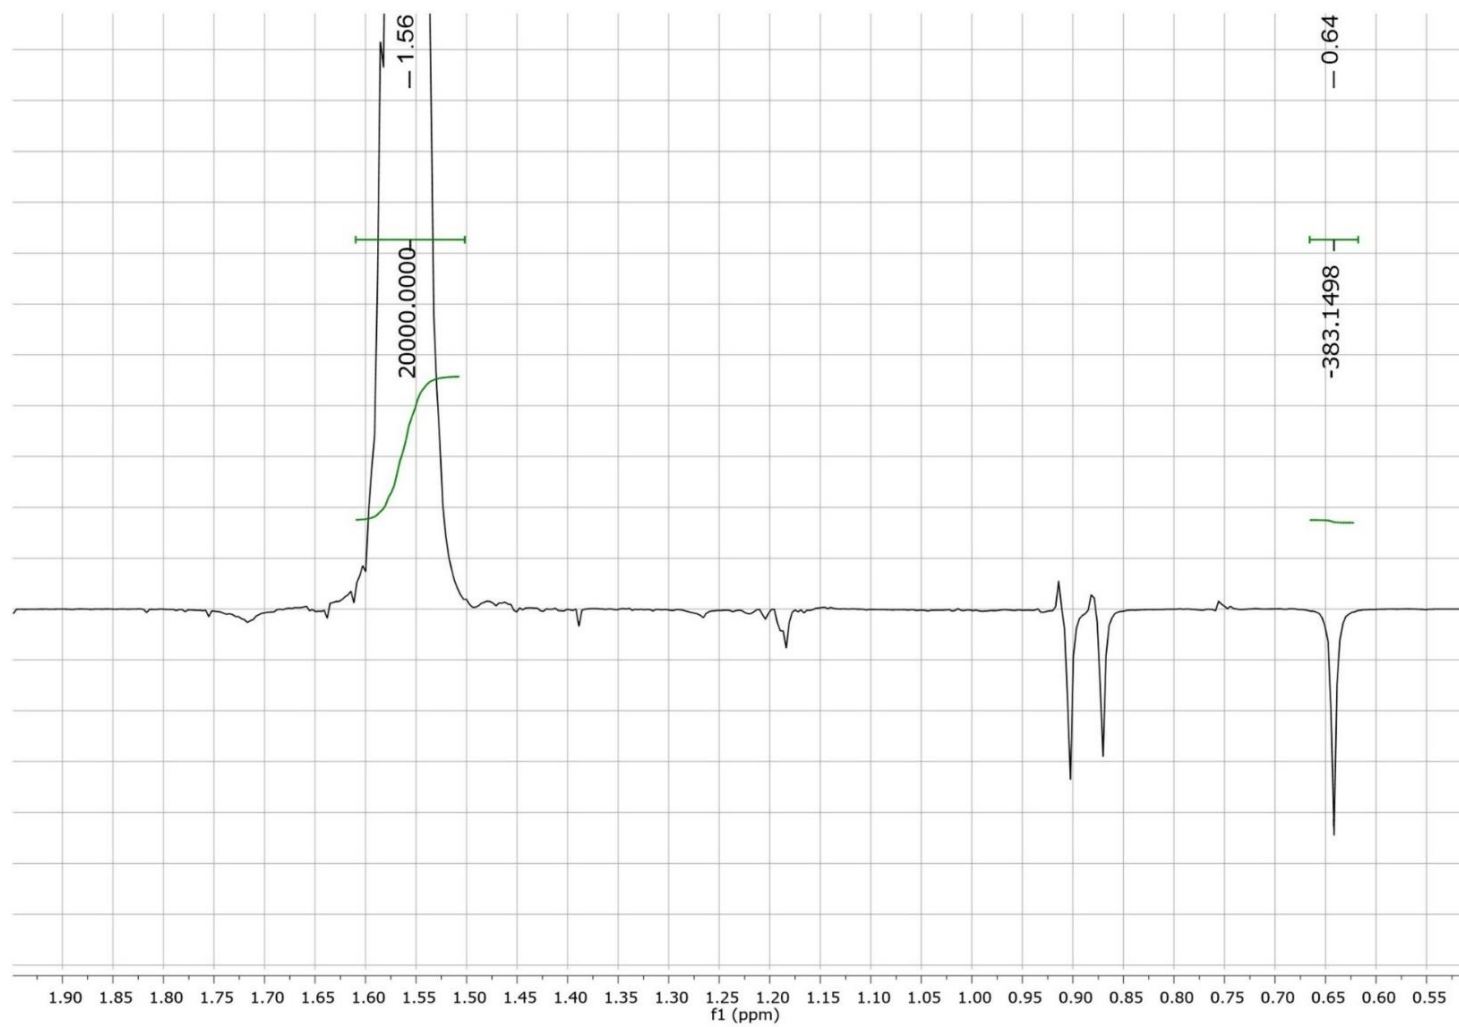

**Figure S35.** 1D ROESY slice extracted from 2D ROESY spectrum of peyssonoside A (**1**) at 700 MHz in DMSO-d<sub>6</sub>

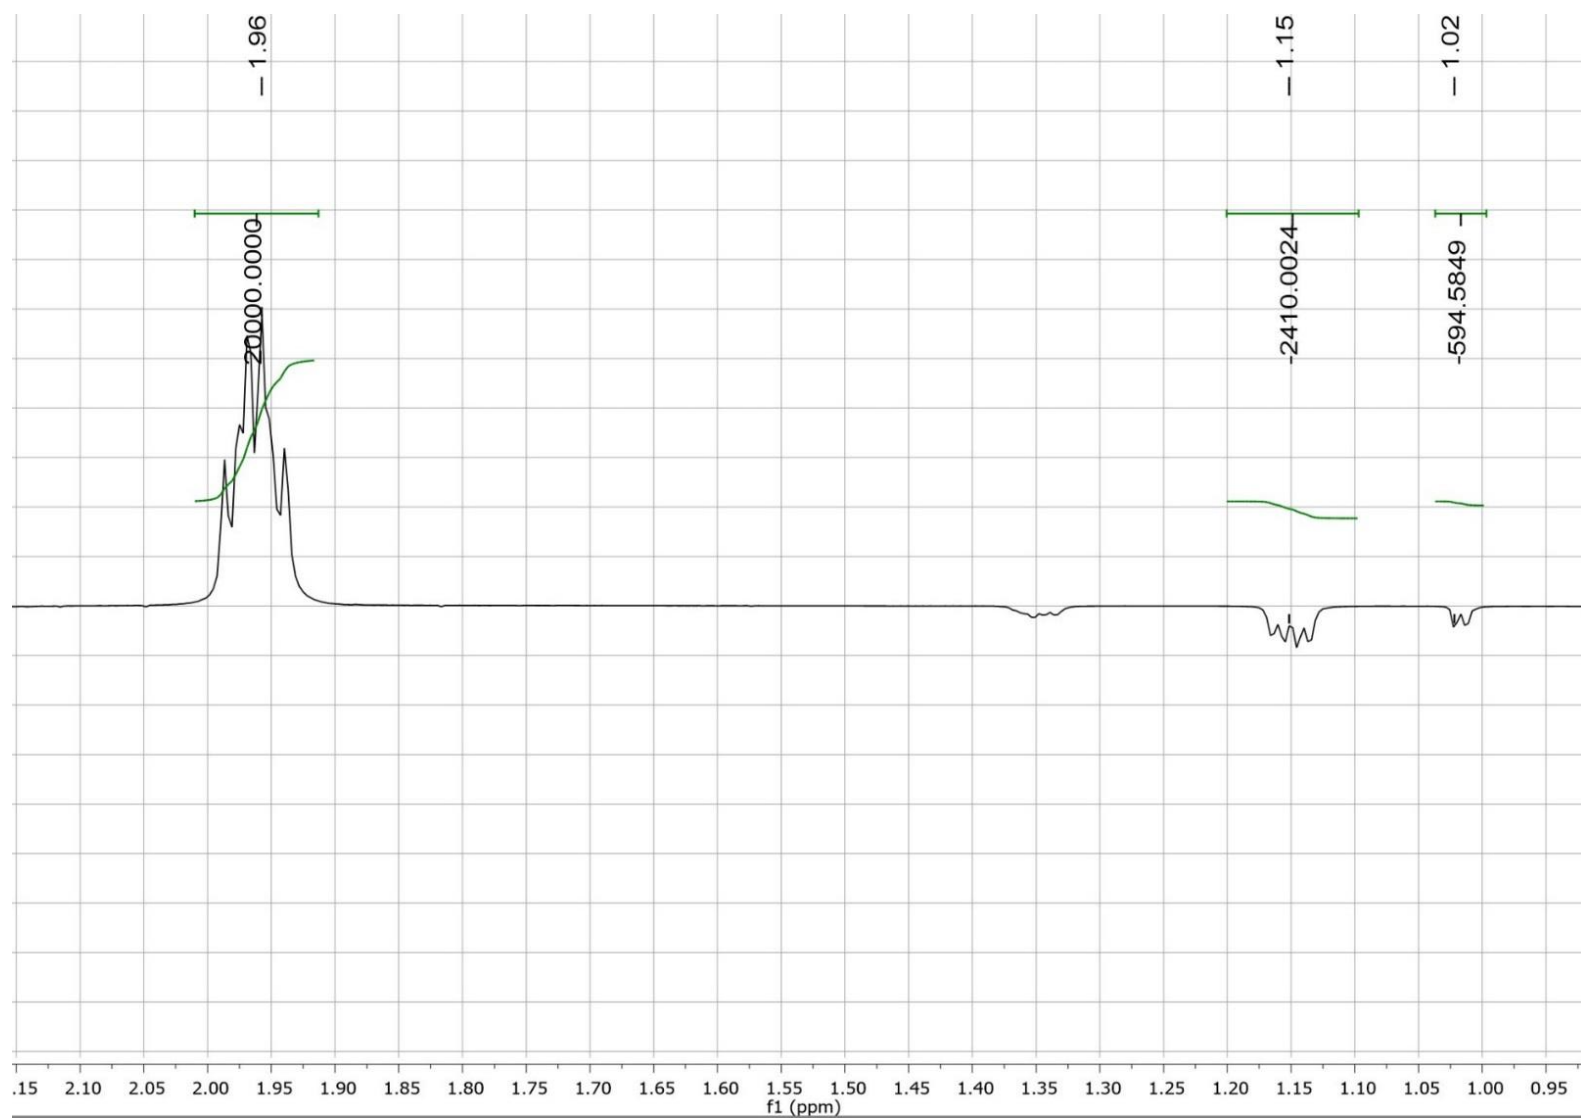

**Figure S36.** 1D ROESY slice extracted from 2D ROESY spectrum of peyssonoside A (**1**) at 700 MHz in DMSO-d<sub>6</sub>

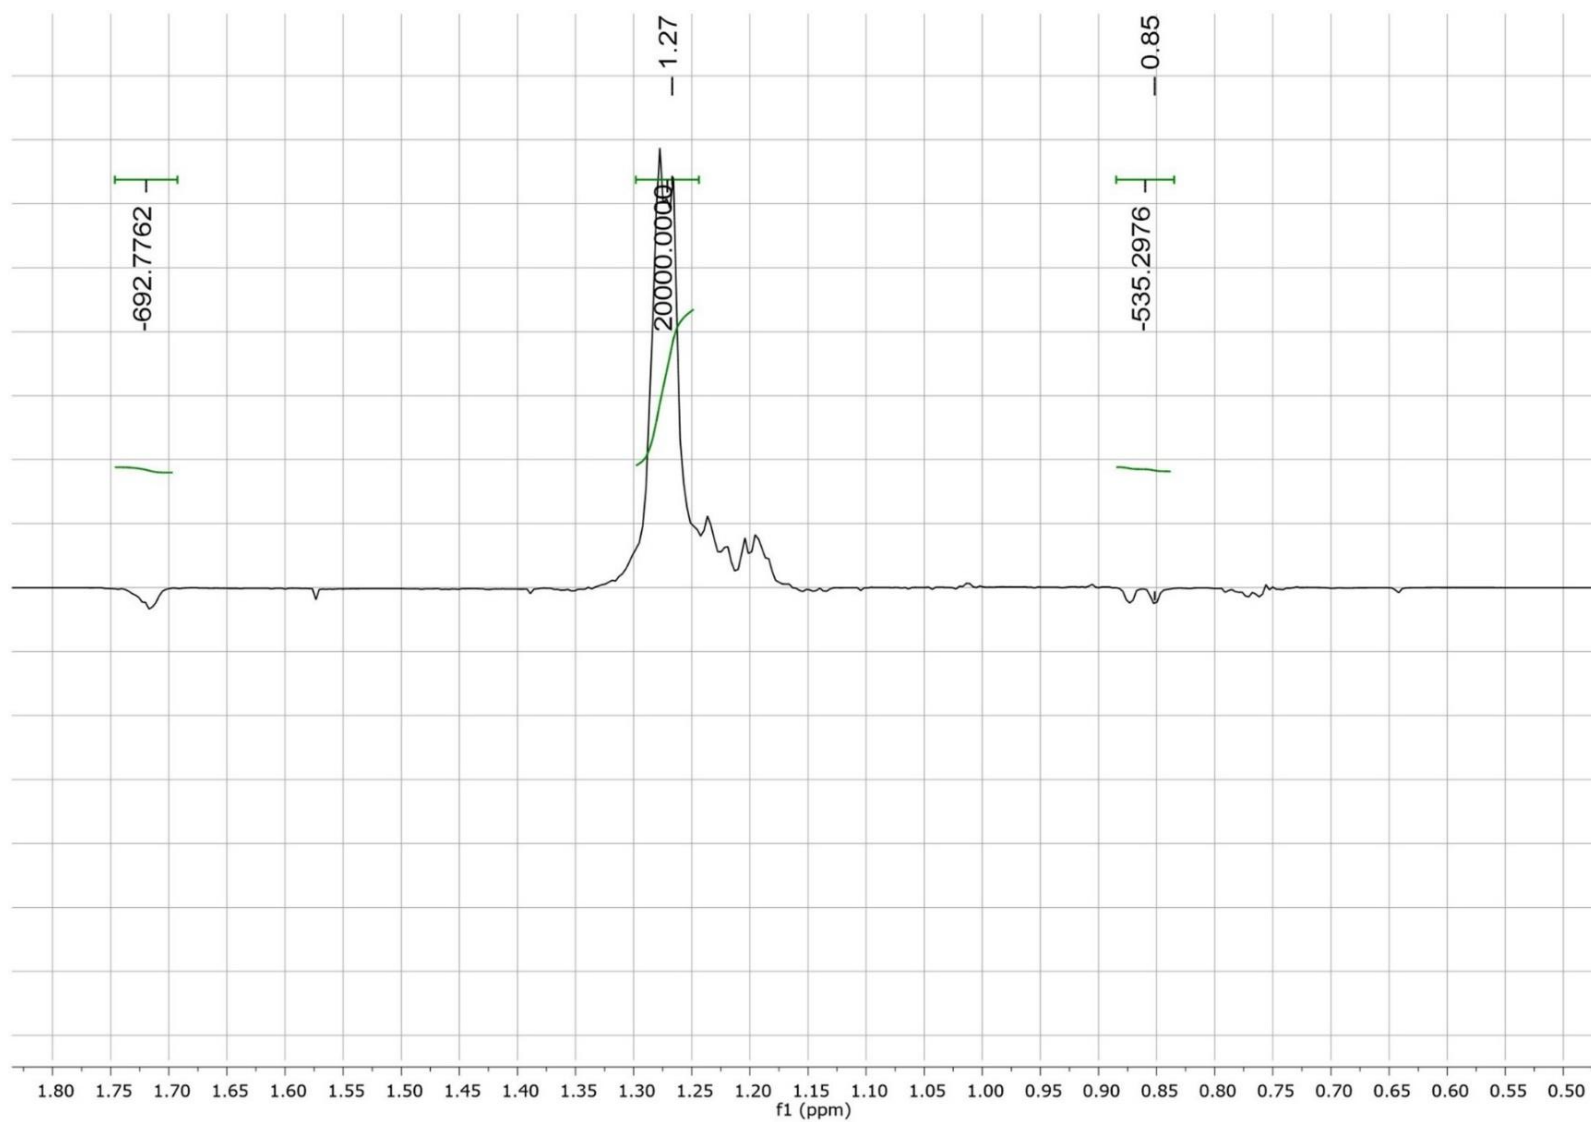

**Figure S37.** 1D ROESY slice extracted from 2D ROESY spectrum of peyssonoside A (**1**) at 700 MHz in DMSO-d<sub>6</sub>

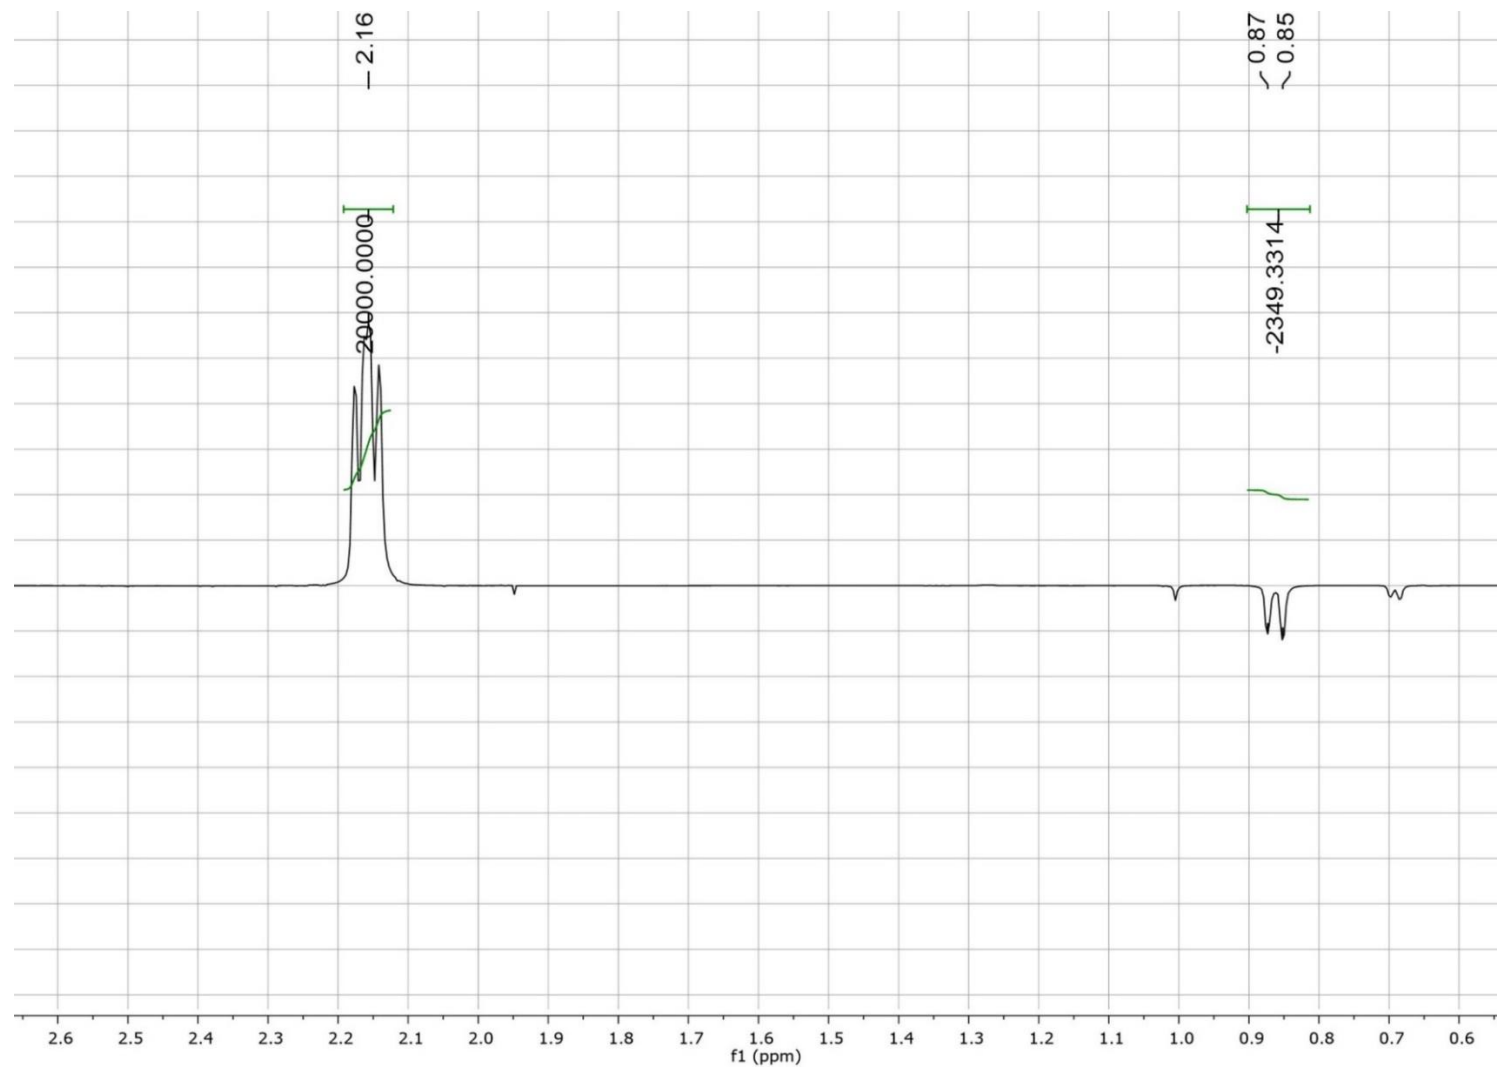

**Figure S38.** Comparison of  $^1\text{H}$  NMR spectra of HP20SS fractions eluting with 80% aqueous methanol for **A** (collection G-1163) and **B** (collection G-1588) at 800 MHz in  $\text{DMSO-d}_6$

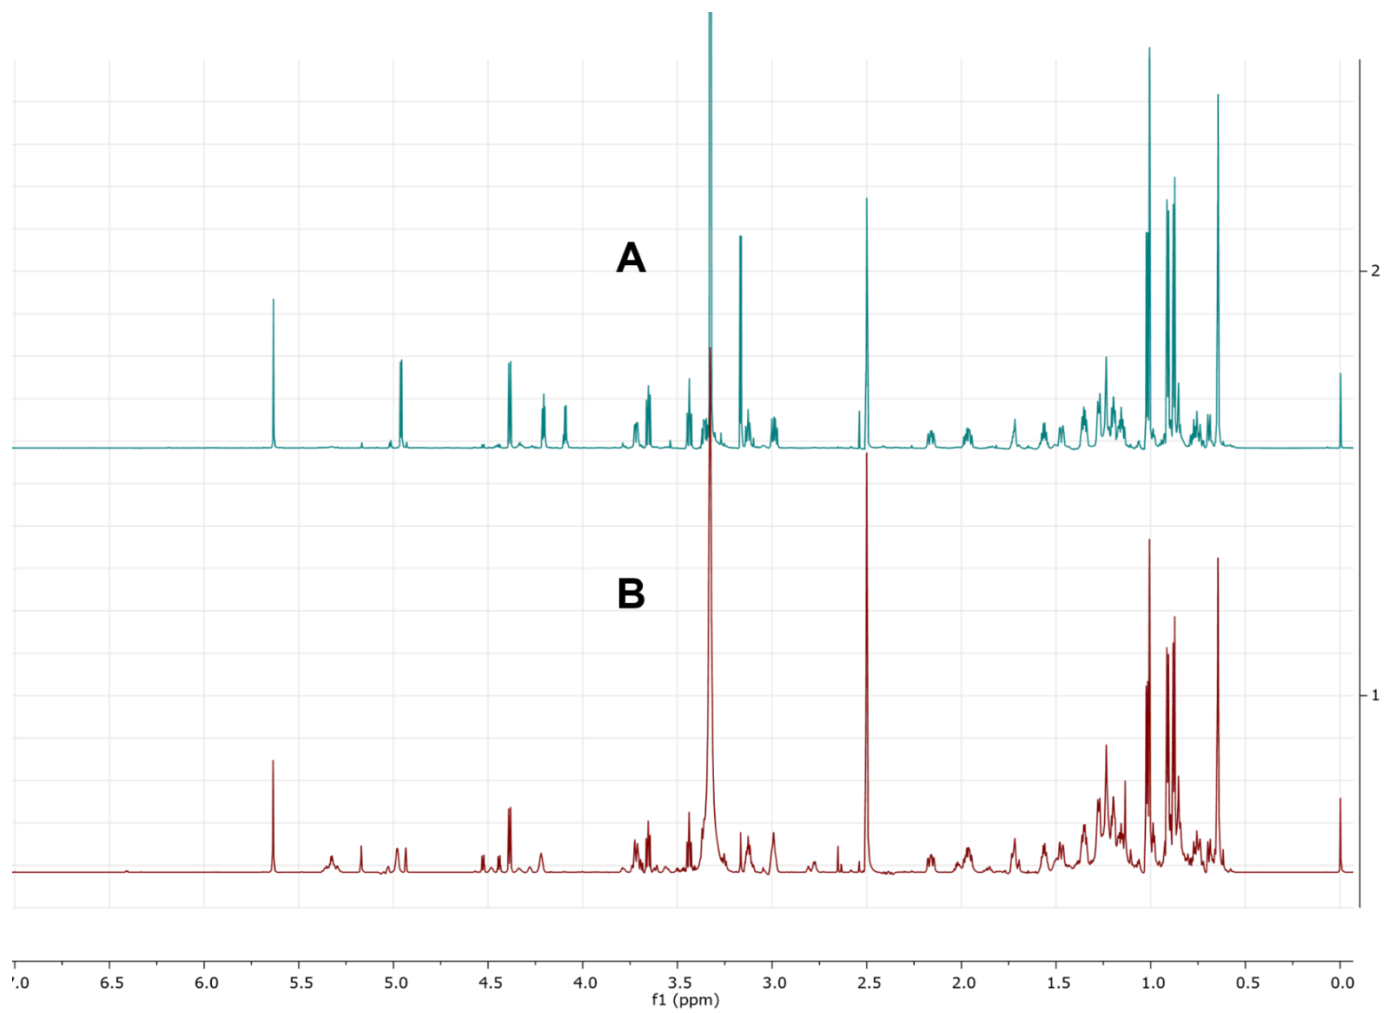

## REFERENCES

- (1) Kimura, M. A simple method for estimating evolutionary rates of base substitutions through comparative studies of nucleotide sequences. *J. Mol. Evol.* **1980**, *16*, 111-120.
- (2) Kumar, S.; Stecher, G.; Li, M.; Knyaz, C.; Tamura, K., MEGA X: Molecular Evolutionary Genetics Analysis across Computing Platforms. *Mol. Biol. Evol.* **2018**, *35*, 1547-1549.
